# Supplementary material for: Silylation of 2H-indazoles by photoinduced hydrogen atom transfer catalysis
Source: Royal Society of Chemistry journal article supplement (doi:10.1039/d3ob01925j), 2023-12-26
Supplement: d3ob01925j1.pdf [file d3ob01925j1.pdf]

# Silylation of 2*H*-Indazoles by Photoinduced Hydrogen-Atom Transfer Catalysis

Krishna Kanta Das and Alakananda Hajra\*

*Department of Chemistry, Visva-Bharati (A Central University), Santiniketan 731235, India;  
Tel./Fax: +913463 261526; E-mail: [alakananda.hajra@visva-bharati.ac.in](mailto:alakananda.hajra@visva-bharati.ac.in)*

## *Table of Contents*

|    |                                                                 |                |
|----|-----------------------------------------------------------------|----------------|
| 1. | <b>General Information</b>                                      | <b>S2</b>      |
| 2. | <b>Experimental Procedures</b>                                  | <b>S3</b>      |
| 3. | <b>Gram-Scale Preparations</b>                                  | <b>S3-S4</b>   |
| 4. | <b>Synthetic Utility</b>                                        | <b>S4</b>      |
| 5. | <b>Starch-Iodine test for the detection of hydrogenperoxide</b> | <b>S4</b>      |
| 6. | <b>Characterization Data for the Synthesized Products</b>       | <b>S5-S11</b>  |
| 7. | <b>X-ray Crystallographic Data of 3p</b>                        | <b>S11-S13</b> |
| 8. | <b>References</b>                                               | <b>S13</b>     |
| 9. | <b>NMR Spectra for the Synthesized Products</b>                 | <b>S14-S64</b> |

## 1. General Information:

All reagents were purchased from commercial sources and used without further purification.  $^1\text{H}$  NMR spectra were determined on 400 MHz spectrometer as solutions in  $\text{CDCl}_3$ . Chemical shifts are expressed in parts per million ( $\delta$ ) and the signals were reported as s (singlet), d (doublet), t (triplet), m (multiplet) and coupling constants ( $J$ ) were given in Hz.  $^{13}\text{C}\{^1\text{H}\}$  NMR spectra were recorded at 100 MHz in  $\text{CDCl}_3$  solution. NMR data are reported relative to residual  $\text{CHCl}_3$  ( $^1\text{H}$ ,  $\delta = 7.26$  ppm) and  $\text{CDCl}_3$  ( $^{13}\text{C}$ ,  $\delta = 77.16$  ppm). TLC was done on silica gel coated glass slide. All 2-arylidazoles<sup>1</sup> were prepared by the reported methods. All solvents were dried and distilled before use. Commercially available solvents were freshly distilled before the reaction. All reactions involving moisture sensitive reactants were executed using oven dried glassware. Melting points (M.p's) were determined after recrystallization of solid compounds from a solution of dichloromethane/petroleum ether (1:3).

### 1.2. Light Information:

Kessil 34 W blue LED (Model No. H150-BLUE) was used as a light source for light promoted reactions.

**Rating of LED:** 24VDC 1.5A 34W

**Model:** H150-BLUE

**Range of wavelength:** 450-530 nm. Manufacturer: Kessil, 1689 Regatta blvd, Richmond, CA94804 ([www.kessil.com](http://www.kessil.com)).

## 2. Experimental Procedures:

### 2.1. Typical Experimental Procedure for 3b:

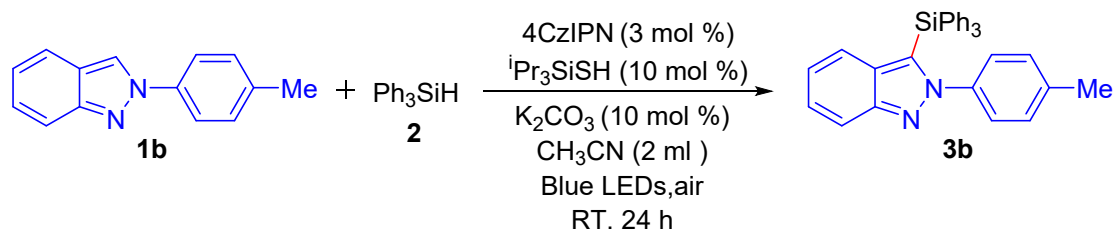

A mixture of 2-(*p*-tolyl)-2*H*-indazole (**1b**) (0.25 mmol, 52.0 mg), Ph<sub>3</sub>SiH (**2**) (2.0 equiv., 130.2 mg), 4CzIPN (3 mol%, 5.9 mg), <sup>i</sup>Pr<sub>3</sub>SiSH (10 mol%, 4.8 mg), K<sub>2</sub>CO<sub>3</sub> (10 mol%, 3.5 mg) and CH<sub>3</sub>CN (2 ml) were added to an oven-dried reaction vessel (tube) equipped with a magnetic stirrer, and the reaction vessel was irradiated with Kessil 34 W blue LED at room temperature under open air atmosphere for 24 h. The progress of the reaction was monitored by TLC, the reaction was cooled to room temperature and extracted with ethyl acetate. The organic phase was dried over anhydrous Na<sub>2</sub>SO<sub>4</sub>. The crude residue was obtained after evaporating the solvent in vacuum and was purified by column chromatography on silica gel using a mixture of petroleum ether and ethyl acetate to afford the pure products.

### 3. Gram-Scale Synthesis for 3b:

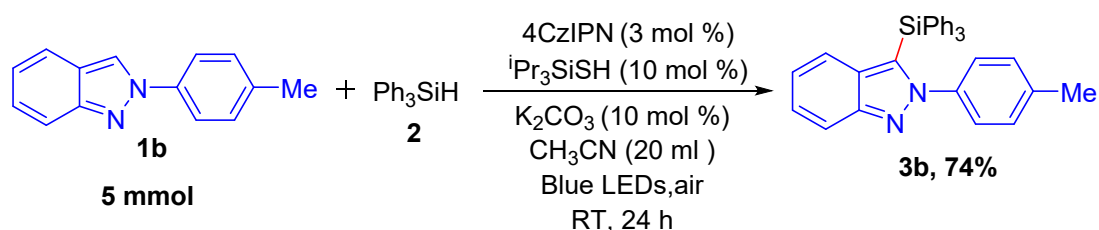

A mixture of 2-(*p*-tolyl)-2*H*-indazole (**1b**) (5.0 mmol, 1.04 g), Ph<sub>3</sub>SiH (2.0 equiv., 2.60 g), 4CzIPN (3 mol%, 118.3 mg), <sup>i</sup>Pr<sub>3</sub>SiSH (10 mol%, 95.2 mg), K<sub>2</sub>CO<sub>3</sub> (10 mol%, 69.1 mg) and CH<sub>3</sub>CN (20 ml) were added to an oven-dried reaction vessel (tube) equipped with a magnetic stirrer, and the reaction vessel was irradiated with Kessil 34 W blue LED at room temperature under open air atmosphere for 24 h. The progress of the reaction was monitored by TLC, the reaction was cooled to room temperature and extracted with ethyl acetate. The organic phase was dried over anhydrous Na<sub>2</sub>SO<sub>4</sub>. The crude residue was obtained after evaporating the solvent in vacuum and was purified by column chromatography on silica gel using a mixture

of petroleum ether and ethyl acetate (92:08) as an eluting solvent to afford the pure product **3b** (1.72 g, 74%) as a white solid.

#### 4. Synthetic Utility:<sup>2</sup>

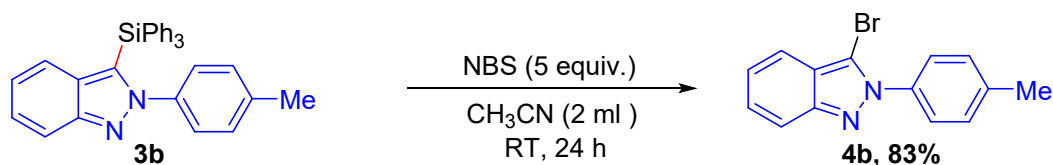

A 25 mL flame-dried Schlenk tube equipped with a magnetic stir bar was charged with N-Bromosuccinimide (NBS) (177.9 mg, 5.0 equiv.), **3b** (93.3 mg, 0.2 mmol), fresh distilled CH<sub>2</sub>Cl<sub>2</sub> or MeCN (2.0 mL) were then added under argon atmosphere. The reaction mixture was allowed to stir at room temperature for 24 h. The reaction mixture was diluted with ethyl acetate. The residue was purified by silica gel flash chromatography to afford the corresponding compound **4b** in 83% yield.

#### 5. Starch-Iodide Test for the Detection of Hydrogenperoxide:<sup>3</sup>

After the completion of reaction (monitored by TLC), aqueous potassium iodide solution was added to the reaction mixture. The aqueous layer turned to light brown-blue colour and the colour was enhanced by addition of starch. To the same aqueous layer, aqueous sodium thiosulfate solution was added and the aqueous layer immediately turned colourless.

The chemical equations involved in this reaction:

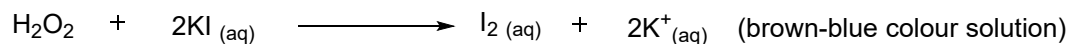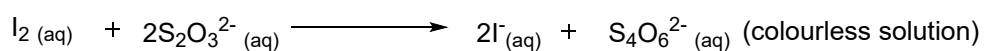

## 6. Characterization Data for the Synthesized Products:

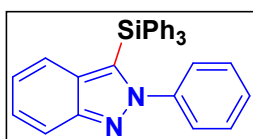

**2-Phenyl-3-(triphenylsilyl)-2H-indazole (3a):** White solid (82%, 92.7 mg);  $R_f = 0.50$  (PE/EA = 92 : 08), M.P. 151-152 °C;  $^1\text{H NMR}$  (400 MHz,  $\text{CDCl}_3$ ):  $\delta$  7.89 (d,  $J = 8.8$  Hz, 1H), 7.48 (d,  $J = 6.8$  Hz, 6H), 7.38 (t,  $J = 7.6$  Hz, 3H), 7.34-7.27 (m, 7H), 7.15-7.09 (m, 3H), 6.98 (d,  $J = 7.6$  Hz, 2H), 6.91-6.86 (m, 2H);  $^{13}\text{C}\{^1\text{H}\}$  NMR (100 MHz,  $\text{CDCl}_3$ ):  $\delta$  149.4, 142.0, 136.2, 132.9, 131.9, 131.5, 129.9, 128.7, 128.3, 128.1, 126.8, 126.2, 122.7, 122.2, 117.9; HRMS (ESI-TOF)  $m/z$ :  $[\text{M} + \text{H}]^+$  Calcd for  $[\text{C}_{31}\text{H}_{25}\text{N}_2\text{Si}]^+$ : 453.1782; found: 453.1794.

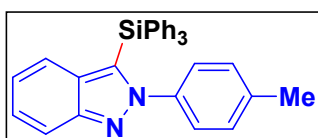

**2-(p-Tolyl)-3-(triphenylsilyl)-2H-indazole (3b):** White solid (85%, 99.0 mg);  $R_f = 0.50$  (PE/EA = 92 : 08), M.P. 177-178 °C;  $^1\text{H NMR}$  (400 MHz,  $\text{CDCl}_3$ ):  $\delta$  7.88 (d,  $J = 8.8$  Hz, 1H), 7.45 (d,  $J = 6.8$  Hz, 6H), 7.37 (t,  $J = 7.6$  Hz, 3H), 7.32-7.29 (m, 1H), 7.27-7.24 (m, 6H), 6.97 (d,  $J = 8.0$  Hz, 2H), 6.87 (d,  $J = 3.6$  Hz, 2H), 6.72 (d,  $J = 8.0$  Hz, 2H), 2.21 (s, 3H);  $^{13}\text{C}\{^1\text{H}\}$  NMR (100 MHz,  $\text{CDCl}_3$ ):  $\delta$  149.3, 139.5, 138.6, 136.2, 135.1, 132.9, 131.7, 129.7, 128.8, 128.0, 126.5, 126.1, 122.6, 122.1, 117.9, 21.1; HRMS (ESI-TOF)  $m/z$ :  $[\text{M} + \text{H}]^+$  Calcd for  $[\text{C}_{32}\text{H}_{27}\text{N}_2\text{Si}]^+$ : 467.1938; found: 467.1940.

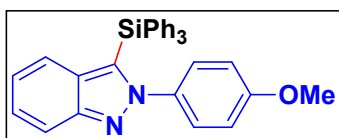

**2-(4-Methoxyphenyl)-3-(triphenylsilyl)-2H-indazole (3c):** White solid (70%, 84.4 mg);  $R_f = 0.50$  (PE/EA = 88 : 12), M.P. 198-199 °C;  $^1\text{H NMR}$  (400 MHz,  $\text{CDCl}_3$ ):  $\delta$  7.85 (d,  $J = 8.0$  Hz, 1H), 7.45-7.43 (m, 6H), 7.36 (t,  $J = 7.6$  Hz, 3H), 7.31-7.24 (m, 7H), 6.99-6.95 (m, 2H), 6.88-6.82 (m, 2H), 6.43-6.39 (m, 2H), 3.69 (s, 3H);  $^{13}\text{C}\{^1\text{H}\}$  NMR (100 MHz,  $\text{CDCl}_3$ ):  $\delta$  159.6, 149.3, 136.2, 135.1, 132.9, 131.9, 131.7, 129.8, 128.0, 127.9, 126.1, 122.6, 122.1, 117.8, 113.4, 55.5; HRMS (ESI-TOF)  $m/z$ :  $[\text{M} + \text{H}]^+$  Calcd for  $[\text{C}_{32}\text{H}_{27}\text{N}_2\text{OSi}]^+$ : 483.1887; found: 483.1901.

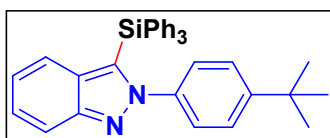

**2-(4-(tert-Butyl)phenyl)-3-(triphenylsilyl)-2H-indazole (3d):** White solid (81%, 103.0 mg);  $R_f = 0.50$  (PE/EA = 93 : 07), M.P. 155-156 °C;  $^1\text{H NMR}$  (400 MHz,  $\text{CDCl}_3$ ):  $\delta$  7.88 (d,  $J = 8.8$  Hz, 1H), 7.49-7.47 (m, 6H), 7.38-7.34 (m, 3H), 7.32-7.29 (m, 1H), 7.28-7.24 (m, 6H),

7.06 (d,  $J = 8.0$  Hz, 2H), 6.97 (d,  $J = 8.8$  Hz, 2H), 6.88-6.87 (m, 2H), 1.22 (s, 9H);  $^{13}\text{C}\{^1\text{H}\}$  NMR (100 MHz,  $\text{CDCl}_3$ ):  $\delta$  151.5, 149.3, 139.4, 136.2, 133.0, 131.8, 131.4, 129.8, 128.0, 126.27, 126.20, 125.3, 122.6, 122.1, 117.9, 34.6, 31.3; Anal. Calcd for  $\text{C}_{35}\text{H}_{32}\text{N}_2\text{Si}$ : C, 82.63; H, 6.34; N, 5.51; Found: C, 82.78; H, 6.37; N, 5.61%.

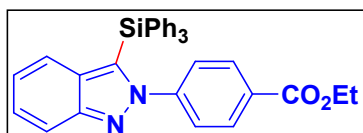

**Ethyl 4-(3-(triphenylsilyl)-2H-indazol-2-yl)benzoate (3e):** White solid (83%, 108.8 mg);  $R_f = 0.50$  (PE/EA = 88 : 12), M.P. 162-163 °C;  $^1\text{H}$  NMR (400 MHz,  $\text{CDCl}_3$ ):  $\delta$  7.88 (d,  $J = 8.8$  Hz, 1H), 7.63 (d,  $J = 8.4$  Hz, 2H), 7.48 (d,  $J = 6.8$  Hz, 6H), 7.38 (d,  $J = 7.6$  Hz, 3H), 7.34-7.30 (m, 1H), 7.28-7.24 (m, 6H), 7.20 (d,  $J = 8.4$  Hz, 2H), 6.91-6.85 (m, 2H), 4.38-4.33 (m, 2H), 1.39 (t,  $J = 7.2$  Hz, 3H);  $^{13}\text{C}\{^1\text{H}\}$  NMR (100 MHz,  $\text{CDCl}_3$ ):  $\delta$  165.7, 149.7, 145.4, 136.2, 132.6, 132.1, 131.8, 130.4, 130.0, 129.7, 128.2, 126.7, 126.6, 122.7, 122.5, 118.0, 61.2, 14.4; HRMS (ESI-TOF)  $m/z$ :  $[\text{M} + \text{H}]^+$  Calcd for  $[\text{C}_{34}\text{H}_{29}\text{N}_2\text{O}_2\text{Si}]^+$ : 525.1993; found: 525.1998.

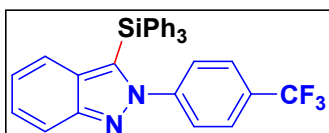

**2-(4-(Trifluoromethyl)phenyl)-3-(triphenylsilyl)-2H-indazole (3f):** White solid (79%, 102.8 mg);  $R_f = 0.50$  (PE/EA = 90 : 10), M.P. 171-172 °C;  $^1\text{H}$  NMR (400 MHz,  $\text{CDCl}_3$ ):  $\delta$  7.89 (d,  $J = 8.4$  Hz, 1H), 7.49-7.47 (m, 6H), 7.41-7.37 (m, 3H), 7.36-7.32 (m, 2H), 7.29 (d,  $J = 7.6$  Hz, 5H), 7.25-7.21 (m, 4H), 6.94-6.91 (m, 2H);  $^{13}\text{C}\{^1\text{H}\}$  NMR (100 MHz,  $\text{CDCl}_3$ ):  $\delta$  149.6, 144.6, 136.1, 132.4, 132.2 (q,  $J = 226.0$  Hz), 132.0, 130.6 (d,  $J = 32.0$  Hz), 130.1, 128.2, 127.2, 126.7, 126.2 (q,  $J = 271.0$  Hz), 125.4 (q,  $J = 4.0$  Hz), 122.7, 122.6, 117.9; Anal. Calcd for  $\text{C}_{32}\text{H}_{23}\text{F}_3\text{N}_2\text{Si}$ : C, 73.82; H, 4.45; N, 5.38%; Found: C, 74.00; H, 4.43; N, 5.30%.

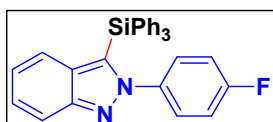

**2-(4-Fluorophenyl)-3-(triphenylsilyl)-2H-indazole (3g):** White solid (78%, 91.7 mg);  $R_f = 0.50$  (PE/EA = 92 : 08), M.P. 162-163 °C;  $^1\text{H}$  NMR (400 MHz,  $\text{CDCl}_3$ ):  $\delta$  7.54 (d,  $J = 8.8$  Hz, 1H), 7.35-7.33 (m, 6H), 7.27 (t,  $J = 7.6$  Hz, 3H), 7.22-7.13 (m, 7H), 6.95-6.92 (m, 2H), 6.79-6.73 (m, 2H), 6.53-6.47 (m, 2H);  $^{13}\text{C}\{^1\text{H}\}$  NMR (100 MHz,  $\text{CDCl}_3$ ):  $\delta$  162.4 (C-F,  $^1J_{\text{C-F}} = 247.0$  Hz), 149.4, 138.13, 138.11, 136.1, 135.1, 132.6, 132.1, 131.8, 130.0, 128.6 (C-F,  $^3J_{\text{C-F}} = 9.0$  Hz), 128.1, 126.5, 122.5 (C-F,  $^2J_{\text{C-F}} = 25.0$  Hz), 117.9, 115.1 (C-F,  $^2J_{\text{C-F}} = 23.0$  Hz); HRMS (ESI-TOF)  $m/z$ :  $[\text{M} + \text{H}]^+$  Calcd for  $[\text{C}_{31}\text{H}_{24}\text{FN}_2\text{Si}]^+$ : 471.1687; found: 471.1703.

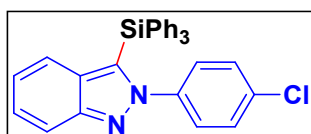

**2-(4-Chlorophenyl)-3-(triphenylsilyl)-2H-indazole (3h):** White solid (69%, 84.0 mg);  $R_f = 0.50$  (PE/EA = 92 : 08), M.P. 184-185 °C;  $^1\text{H}$  NMR (400 MHz,  $\text{CDCl}_3$ ):  $\delta$  7.86 (d,  $J = 8.8$  Hz,

1H), 7.46 (d,  $J = 6.8$  Hz, 6H), 7.40 (t,  $J = 7.6$  Hz, 3H), 7.34-7.27 (m, 7H), 7.01 (d,  $J = 8.8$  Hz, 2H), 6.90-6.86 (m, 4H);  $^{13}\text{C}\{^1\text{H}\}$  NMR (100 MHz,  $\text{CDCl}_3$ ):  $\delta$  149.5, 140.5, 136.2, 134.7, 132.6, 132.1, 131.9, 130.0, 128.4, 128.2, 128.1, 126.5, 122.6, 122.4, 117.9; Anal. Calcd for  $\text{C}_{31}\text{H}_{23}\text{ClN}_2\text{Si}$ : C, 76.44; H, 4.76; N, 5.75; Found: C, 76.24; H, 4.81; N, 5.63%.

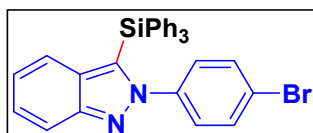

**2-(4-Bromophenyl)-3-(triphenylsilyl)-2H-indazole (3i):** White solid (75%, 99.6 mg);  $R_f = 0.50$  (PE/EA = 92 : 08), M.P. 187-188 °C;  $^1\text{H}$  NMR (400 MHz,  $\text{CDCl}_3$ ):  $\delta$  7.86 (d,  $J = 8.8$  Hz, 1H), 7.45 (d,  $J = 7.2$  Hz, 6H), 7.41 (t,  $J = 7.2$  Hz, 3H), 7.33-7.27 (m, 7H), 7.04 (d,  $J = 8.4$  Hz, 2H), 6.95 (d,  $J = 8.4$  Hz, 2H), 6.91-6.86 (m, 2H);  $^{13}\text{C}\{^1\text{H}\}$  NMR (100 MHz,  $\text{CDCl}_3$ ):  $\delta$  149.5, 140.9, 136.1, 132.5, 132.1, 131.9, 131.4, 130.0, 128.3, 128.2, 126.5, 123.0, 122.6, 122.4, 117.9; HRMS (ESI-TOF)  $m/z$ :  $[\text{M} + \text{Na}]^+$  Calcd for  $[\text{C}_{31}\text{H}_{23}\text{BrN}_2\text{NaSi}]^+$ : 553.0706; found: 553.0706.

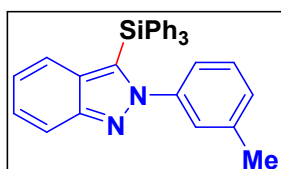

**2-(m-Tolyl)-3-(triphenylsilyl)-2H-indazole (3j):** White solid (83%, 96.8 mg);  $R_f = 0.50$  (PE/EA = 92 : 08), M.P. 183-184 °C;  $^1\text{H}$  NMR (400 MHz,  $\text{CDCl}_3$ ):  $\delta$  7.88 (d,  $J = 8.8$  Hz, 1H), 7.49-7.47 (m, 6H), 7.39-7.35 (m, 3H), 7.33-7.27 (m, 7H), 6.99-6.97 (m, 1H), 6.90-6.87 (m, 5H), 2.02 (s, 3H);  $^{13}\text{C}\{^1\text{H}\}$  NMR (100 MHz,  $\text{CDCl}_3$ ):  $\delta$  149.4, 141.9, 138.3, 136.2, 135.9, 132.9, 131.8, 129.8, 129.5, 128.2, 128.0, 127.6, 126.1, 123.8, 122.6, 122.1, 117.9, 20.9; HRMS (ESI-TOF)  $m/z$ :  $[\text{M} + \text{H}]^+$  Calcd for  $[\text{C}_{32}\text{H}_{27}\text{N}_2\text{Si}]^+$ : 467.1938; found: 467.1936.

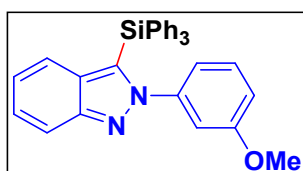

**2-(3-Methoxyphenyl)-3-(triphenylsilyl)-2H-indazole (3k):** White solid (85%, 102.5 mg);  $R_f = 0.50$  (PE/EA = 88 : 12), M.P. 196-197 °C;  $^1\text{H}$  NMR (400 MHz,  $\text{CDCl}_3$ ):  $\delta$  7.88 (d,  $J = 8.8$  Hz, 1H), 7.50-7.48 (m, 6H), 7.38 (t,  $J = 7.6$  Hz, 3H), 7.33-7.26 (m, 7H), 6.91-6.83 (m, 3H), 6.74 (d,  $J = 8.0$  Hz, 1H), 6.66-6.62 (m, 2H), 3.38 (s, 3H);  $^{13}\text{C}\{^1\text{H}\}$  NMR (100 MHz,  $\text{CDCl}_3$ ):  $\delta$  159.2, 149.4, 143.0, 136.2, 132.9, 131.8, 131.5, 129.9, 129.3, 128.0, 126.2, 122.7, 122.2, 119.2, 118.0, 115.9, 111.6, 55.0; Anal. Calcd for  $\text{C}_{32}\text{H}_{26}\text{N}_2\text{OSi}$ : C, 79.63; H, 5.43; N, 5.80; Found: C, 79.79; H, 5.39; N, 5.88%.

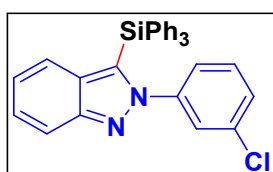

**2-(3-Chlorophenyl)-3-(triphenylsilyl)-2H-indazole (3l):** White solid (73%, 88.0 mg);  $R_f = 0.50$  (PE/EA = 92 : 08), M.P. 168-169 °C;  $^1\text{H NMR}$  (400 MHz,  $\text{CDCl}_3$ ):  $\delta$  7.86 (d,  $J = 8.8$  Hz, 1H), 7.50-7.48 (m, 6H), 7.39 (t,  $J = 7.2$  Hz, 3H), 7.33-7.27 (m, 7H), 7.11-7.10 (m, 1H), 7.07-7.04 (m, 2H), 6.92-6.87 (m, 3H);  $^{13}\text{C}\{^1\text{H}\}$  NMR (100 MHz,  $\text{CDCl}_3$ ):  $\delta$  149.5, 142.9, 136.1, 134.0, 132.6, 132.0, 131.9, 130.1, 129.4, 129.0, 128.2, 127.4, 126.6, 125.0, 122.7, 122.5, 118.0; HRMS (ESI-TOF)  $m/z$ :  $[\text{M} + \text{H}]^+$  Calcd for  $[\text{C}_{31}\text{H}_{24}\text{ClN}_2\text{Si}]^+$ : 487.1392; found: 487.1387.

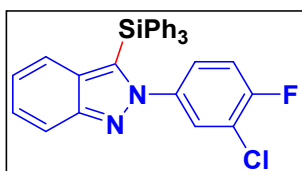

**2-(3-Chloro-4-fluorophenyl)-3-(triphenylsilyl)-2H-indazole (3m):** White solid (87%, 109.8 mg);  $R_f = 0.50$  (PE/EA = 92 : 08), M.P. 177-178 °C;  $^1\text{H NMR}$  (400 MHz,  $\text{CDCl}_3$ ):  $\delta$  7.86 (d,  $J = 8.8$  Hz, 1H), 7.50 (d,  $J = 6.8$  Hz, 6H), 7.42 (t,  $J = 7.6$  Hz, 3H), 7.35-7.30 (m, 7H), 7.14-7.12 (m, 1H), 7.04-7.00 (m, 1H), 6.93-6.88 (m, 2H), 6.71 (t,  $J = 8.8$  Hz, 1H);  $^{13}\text{C}\{^1\text{H}\}$  NMR (100 MHz,  $\text{CDCl}_3$ ):  $\delta$  158.0 (C-F,  $^1J_{\text{C-F}} = 251.0$  Hz), 149.5, 138.56, 138.53, 136.1, 132.4 (C-F,  $^3J_{\text{C-F}} = 9.0$  Hz), 131.8, 130.2, 129.6, 128.2, 126.79, 126.76, 126.72, 122.6 (C-F,  $^3J_{\text{C-F}} = 3.0$  Hz), 120.8 (C-F,  $^2J_{\text{C-F}} = 19.0$  Hz), 117.9, 116.0 (C-F,  $^2J_{\text{C-F}} = 22.0$  Hz); Anal. Calcd for  $\text{C}_{31}\text{H}_{22}\text{ClFN}_2\text{Si}$ : C, 73.72; H, 4.39; N, 5.55; Found: C, 73.91; H, 4.36; N, 5.61%.

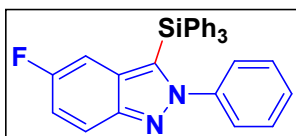

**5-Fluoro-2-phenyl-3-(triphenylsilyl)-2H-indazole (3n):** White solid (72%, 84.6 mg);  $R_f = 0.50$  (PE/EA = 92 : 08), M.P. 157-158 °C;  $^1\text{H NMR}$  (400 MHz,  $\text{CDCl}_3$ ):  $\delta$  7.85-7.82 (m, 1H), 7.46-7.44 (m, 6H), 7.40-7.36 (m, 3H), 7.27 (t,  $J = 8.0$  Hz, 6H), 7.13-7.08 (m, 4H), 6.99-6.95 (m, 2H);  $^{13}\text{C}\{^1\text{H}\}$  NMR (100 MHz,  $\text{CDCl}_3$ ):  $\delta$  158.3 (C-F,  $^1J_{\text{C-F}} = 238.0$  Hz), 146.8, 141.9, 136.1, 132.5, 131.7, 131.5 (C-F,  $^3J_{\text{C-F}} = 11.0$  Hz), 130.0, 128.9, 128.5, 128.2, 126.7, 119.9 (C-F,  $^3J_{\text{C-F}} = 10.0$  Hz), 117.8 (C-F,  $^2J_{\text{C-F}} = 29.0$  Hz), 105.2 (C-F,  $^2J_{\text{C-F}} = 24.0$  Hz); Anal. Calcd for  $\text{C}_{31}\text{H}_{23}\text{FN}_2\text{Si}$ : C, 79.12; H, 4.93; N, 5.95; Found: C, 79.33; H, 4.97; N, 5.86%.

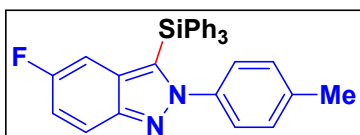

**5-Fluoro-2-(p-tolyl)-3-(triphenylsilyl)-2H-indazole (3o):** White solid (76%, 92.0 mg);  $R_f = 0.50$  (PE/EA = 92 : 08), M.P. 183-184 °C;  $^1\text{H NMR}$  (400 MHz,  $\text{CDCl}_3$ ):  $\delta$  7.83-7.80 (m, 1H), 7.43-7.41 (m, 6H), 7.37 (t,  $J = 7.6$  Hz, 3H), 7.27 (d,  $J = 7.6$  Hz, 4H), 7.24 (d,  $J = 3.2$  Hz, 2H), 7.11-7.06 (m, 1H), 6.93 (d,  $J = 8.0$  Hz, 2H), 6.71 (d,  $J = 8.0$  Hz, 2H), 6.35-6.32 (m, 1H), 2.19 (s, 3H);  $^{13}\text{C}\{^1\text{H}\}$  NMR (100 MHz,  $\text{CDCl}_3$ ):  $\delta$  158.2 (C-F,  $^1J_{\text{C-F}} = 239.0$  Hz), 146.7, 139.4, 138.8, 136.1, 132.5, 131.8, 131.3 (C-F,  $^3J_{\text{C-F}} = 11.0$  Hz), 129.8, 128.9, 128.1, 126.4, 119.8 (C-F,  $^3J_{\text{C-F}} = 10.0$  Hz), 117.6 (C-F,  $^2J_{\text{C-F}} = 29.0$  Hz), 105.2 (C-F,  $^2J_{\text{C-F}} = 24.0$  Hz), 21.1;



Anal. Calcd for C<sub>32</sub>H<sub>25</sub>FN<sub>2</sub>Si: C, 79.31; H, 5.20; N, 5.78; Found: C, 79.14; H, 5.22; N, 5.88%.

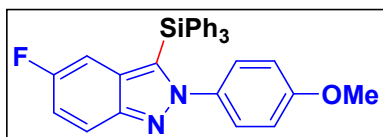

**5-Fluoro-2-(4-methoxyphenyl)-3-(triphenylsilyl)-2H-indazole (3p):** White solid (68%, 85.1 mg);  $R_f = 0.50$  (PE/EA = 87 : 13), M.P. 202-203 °C; <sup>1</sup>H NMR (400 MHz, CDCl<sub>3</sub>):  $\delta$  7.84-7.81 (m, 1H), 7.46-7.44 (m, 6H), 7.39 (t,  $J = 7.6$  Hz, 3H), 7.30-7.26 (m, 6H), 7.12-7.07 (m, 1H), 7.00-6.96 (m, 2H), 6.44-6.41 (m, 2H), 6.36-6.33 (m, 1H), 3.70 (s, 3H); <sup>13</sup>C{<sup>1</sup>H} NMR (100 MHz, CDCl<sub>3</sub>):  $\delta$  159.8, 158.3 (C-F,  $^1J_{C-F} = 239.0$  Hz), 146.6, 136.2, 134.9, 132.6, 132.2, 131.3 (C-F,  $^3J_{C-F} = 11.0$  Hz), 130.0, 128.1, 127.9, 119.8 (C-F,  $^3J_{C-F} = 9.0$  Hz), 117.8 (C-F,  $^2J_{C-F} = 29.0$  Hz), 113.6, 105.2 (C-F,  $^2J_{C-F} = 25.0$  Hz), 55.6; Anal. Calcd for C<sub>32</sub>H<sub>25</sub>FN<sub>2</sub>OSi: C, 76.77; H, 5.03; N, 5.60; Found: C, 76.64; H, 4.99; N, 5.53%.

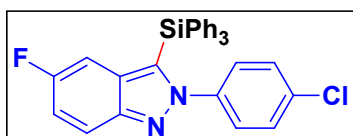

**2-(4-Chlorophenyl)-5-fluoro-3-(triphenylsilyl)-2H-indazole (3q):** White solid (79%, 99.7 mg);  $R_f = 0.50$  (PE/EA = 92 : 08), M.P. 204-205 °C; <sup>1</sup>H NMR (400 MHz, CDCl<sub>3</sub>):  $\delta$  7.85-7.81 (m, 1H), 7.47-7.40 (m, 9H), 7.30 (t,  $J = 7.6$  Hz, 6H), 7.14-7.09 (m, 1H), 7.01 (d,  $J = 7.2$  Hz, 2H), 6.90 (d,  $J = 8.4$  Hz, 2H), 6.38 (d,  $J = 10.0$  Hz, 1H); <sup>13</sup>C{<sup>1</sup>H} NMR (100 MHz, CDCl<sub>3</sub>):  $\delta$  158.4 (C-F,  $^1J_{C-F} = 239.0$  Hz), 146.9, 140.3, 136.1, 134.9, 132.3, 132.2, 131.5 (C-F,  $^3J_{C-F} = 12.0$  Hz), 130.1, 128.5, 128.3, 128.0, 119.9 (C-F,  $^3J_{C-F} = 10.0$  Hz), 118.1 (C-F,  $^2J_{C-F} = 29.0$  Hz), 105.2 (C-F,  $^2J_{C-F} = 25.0$  Hz); Anal. Calcd for C<sub>31</sub>H<sub>22</sub>ClFN<sub>2</sub>Si: C, 73.72; H, 4.39; N, 5.55; Found: C, 73.91; H, 4.44; N, 5.63%.

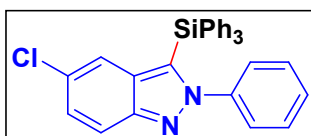

**5-Chloro-2-phenyl-3-(triphenylsilyl)-2H-indazole (3r):** White solid (81%, 98.6 mg);  $R_f = 0.50$  (PE/EA = 92 : 08), M.P. 163-164 °C; <sup>1</sup>H NMR (400 MHz, CDCl<sub>3</sub>):  $\delta$  7.79 (d,  $J = 8.8$  Hz, 1H), 7.45 (d,  $J = 7.2$  Hz, 6H), 7.38 (t,  $J = 7.6$  Hz, 3H), 7.28 (d,  $J = 7.6$  Hz, 6H), 7.24-7.21 (m, 1H), 7.12-7.08 (m, 3H), 6.96 (t,  $J = 8.0$  Hz, 2H), 6.68 (d,  $J = 1.2$  Hz, 1H); <sup>13</sup>C{<sup>1</sup>H} NMR (100 MHz, CDCl<sub>3</sub>):  $\delta$  147.7, 141.7, 136.1, 135.0, 132.3, 131.6, 130.1, 128.9, 128.5, 128.2, 127.7, 127.6, 126.6, 121.4, 119.4; HRMS (ESI-TOF)  $m/z$ : [M + H]<sup>+</sup> Calcd for [C<sub>31</sub>H<sub>24</sub>ClN<sub>2</sub>Si]<sup>+</sup>: 487.1392; found: 487.1391.

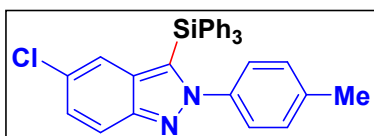

**5-Chloro-2-(p-tolyl)-3-(triphenylsilyl)-2H-indazole (3s):** White solid (65%, 81.4 mg);  $R_f = 0.50$  (PE/EA = 92 : 08), M.P. 196-197 °C; <sup>1</sup>H NMR (400 MHz, CDCl<sub>3</sub>):  $\delta$  7.79 (d,  $J = 9.2$  Hz,

1H), 7.43 (d,  $J = 6.8$  Hz, 6H), 7.39 (t,  $J = 7.6$  Hz, 3H), 7.27 (d,  $J = 8.0$  Hz, 6H), 7.23-7.21 (m, 1H), 6.94 (d,  $J = 8.4$  Hz, 2H), 6.73-6.69 (m, 3H), 2.20 (s, 3H);  $^{13}\text{C}\{^1\text{H}\}$  NMR (100 MHz,  $\text{CDCl}_3$ ):  $\delta$  147.7, 139.3, 138.9, 136.2, 132.5, 132.2, 131.8, 129.9, 128.9, 128.1, 127.7, 127.5, 126.4, 121.4, 119.4, 21.1; HRMS (ESI-TOF)  $m/z$ :  $[\text{M} + \text{H}]^+$  Calcd for  $[\text{C}_{32}\text{H}_{26}\text{ClN}_2\text{Si}]^+$ : 501.1548; found: 501.1558.

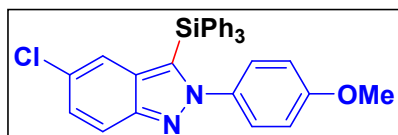

**5-Chloro-2-(4-methoxyphenyl)-3-(triphenylsilyl)-2H-indazole (3t):** White solid (84%, 108.5 mg);  $R_f = 0.50$  (PE/EA = 87 : 13), M.P. 199-200 °C;  $^1\text{H}$  NMR (400 MHz,  $\text{CDCl}_3$ ):  $\delta$  7.79 (d,  $J = 9.2$  Hz, 1H), 7.47-7.45 (m, 6H), 7.42-7.38 (m, 3H), 7.30 (t,  $J = 7.6$  Hz, 6H), 7.24-7.22 (m, 1H), 7.01-6.97 (m, 2H), 6.71 (d,  $J = 1.2$  Hz, 1H), 3.70 (s, 3H);  $^{13}\text{C}\{^1\text{H}\}$  NMR (100 MHz,  $\text{CDCl}_3$ ):  $\delta$  159.8, 147.7, 136.2, 134.9, 132.5, 132.1, 132.0, 130.0, 128.1, 127.8, 127.7, 127.5, 121.3, 119.3, 113.5, 55.5; Anal. Calcd for  $\text{C}_{32}\text{H}_{25}\text{ClN}_2\text{OSi}$ : C, 74.33; H, 4.87; N, 5.42; Found: C, 74.47; H, 4.84; N, 5.31%.

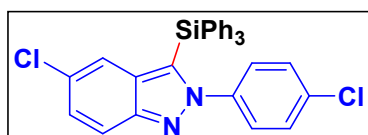

**5-Chloro-2-(4-chlorophenyl)-3-(triphenylsilyl)-2H-indazole (3u):** White solid (89%, 116.0 mg);  $R_f = 0.50$  (PE/EA = 92 : 08), M.P. 154-155 °C;  $^1\text{H}$  NMR (400 MHz,  $\text{CDCl}_3$ ):  $\delta$  7.80 (d,  $J = 8.8$  Hz, 1H), 7.48-7.46 (m, 6H), 7.43 (d,  $J = 7.6$  Hz, 3H), 7.32 (t,  $J = 7.6$  Hz, 6H), 7.27-7.24 (m, 1H), 7.02 (d,  $J = 8.4$  Hz, 2H), 6.91 (d,  $J = 8.8$  Hz, 2H), 6.73 (d,  $J = 1.6$  Hz, 1H);  $^{13}\text{C}\{^1\text{H}\}$  NMR (100 MHz,  $\text{CDCl}_3$ ):  $\delta$  147.9, 140.2, 136.1, 135.1, 135.0, 132.3, 132.2, 130.2, 128.5, 128.3, 128.0, 127.99, 127.95, 121.3, 119.4; Anal. Calcd for  $\text{C}_{31}\text{H}_{22}\text{Cl}_2\text{N}_2\text{Si}$ : C, 71.40; H, 4.25; N, 5.37; Found: C, 71.25; H, 4.23; N, 5.27%.

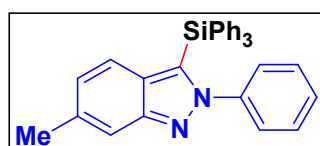

**6-Methyl-2-phenyl-3-(triphenylsilyl)-2H-indazole (3v):** White solid (74%, 86.3 mg);  $R_f = 0.50$  (PE/EA = 92 : 08), M.P. 178-179 °C;  $^1\text{H}$  NMR (400 MHz,  $\text{CDCl}_3$ ):  $\delta$  7.62 (d,  $J = 0.8$  Hz, 1H), 7.47-7.45 (m, 6H), 7.38-7.34 (m, 3H), 7.26 (t,  $J = 2.0$  Hz, 6H), 7.12-7.07 (m, 3H), 6.95 (t,  $J = 8.0$  Hz, 2H), 6.73 (s, 2H), 2.43 (s, 3H);  $^{13}\text{C}\{^1\text{H}\}$  NMR (100 MHz,  $\text{CDCl}_3$ ):  $\delta$  149.7, 141.8, 136.2, 135.1, 132.9, 131.6, 130.3, 129.9, 128.7, 128.4, 128.1, 126.8, 125.2, 122.2, 116.1, 22.1; Anal. Calcd for  $\text{C}_{32}\text{H}_{26}\text{N}_2\text{Si}$ : C, 82.36; H, 5.62; N, 6.00; Found: C, 82.52; H, 5.58; N, 6.12%.

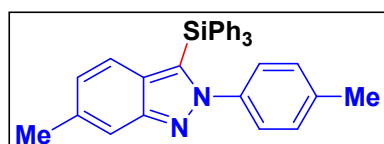

**6-Methyl-2-(*p*-tolyl)-3-(triphenylsilyl)-2*H*-indazole (3w):** White solid (71%, 85.3 mg);  $R_f = 0.50$  (PE/EA = 92 : 08), M.P. 189-190 °C;  $^1\text{H}$  NMR (400 MHz,  $\text{CDCl}_3$ ):  $\delta$  7.60 (s, 1H), 7.44-7.42 (m, 6H), 7.37-7.33 (m, 3H), 7.24 (t,  $J = 7.6$  Hz, 6H), 6.94 (d,  $J = 8.0$  Hz, 2H), 6.72-6.68 (m, 4H), 2.42 (s, 3H), 2.18 (s, 3H);  $^{13}\text{C}\{^1\text{H}\}$  NMR (100 MHz,  $\text{CDCl}_3$ ):  $\delta$  149.9, 139.6, 138.5, 136.2, 136.0, 133.0, 131.5, 130.2, 129.7, 128.8, 128.0, 126.6, 125.0, 122.1, 116.2, 22.18, 21.15; Anal. Calcd for  $\text{C}_{33}\text{H}_{28}\text{N}_2\text{Si}$ : C, 82.46; H, 5.87; N, 5.83; Found: C, 82.26; H, 5.89; N, 5.75%.

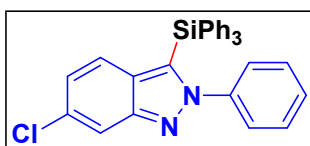

**6-Chloro-2-phenyl-3-(triphenylsilyl)-2*H*-indazole (3x):** White solid (67%, 81.5 mg);  $R_f = 0.50$  (PE/EA = 92 : 08), M.P. 166-167 °C;  $^1\text{H}$  NMR (400 MHz,  $\text{CDCl}_3$ ):  $\delta$  7.84 (d,  $J = 0.3$  Hz, 1H), 7.45-7.43 (m, 6H), 7.41-7.35 (m, 3H), 7.29-7.25 (m, 6H), 7.13-7.09 (m, 3H), 6.99-6.95 (m, 2H), 6.83-6.80 (m, 1H), 6.74 (d,  $J = 8.8$  Hz, 1H);  $^{13}\text{C}\{^1\text{H}\}$  NMR (100 MHz,  $\text{CDCl}_3$ ):  $\delta$  149.6, 141.7, 136.1, 132.6, 132.5, 132.3, 130.2, 130.1, 128.9, 128.5, 128.2, 126.7, 123.9, 123.7, 116.8; Anal. Calcd for  $\text{C}_{31}\text{H}_{23}\text{ClN}_2\text{Si}$ : C, 76.44; H, 4.76; N, 5.75; Found: C, 76.30; H, 4.79; N, 5.81%.

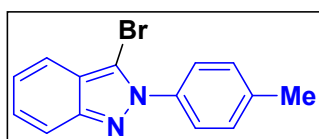

**3-Bromo-2-(*p*-tolyl)-2*H*-indazole (4b)<sup>4</sup>:** White solid (83%, 47.6 mg);  $R_f = 0.50$  (PE/EA = 96 : 04);  $^1\text{H}$  NMR (400 MHz,  $\text{CDCl}_3$ )  $\delta$  7.75 (d,  $J = 8.8$  Hz, 1 H), 7.59-7.54 (m, 3H), 7.38-7.33 (m, 3H), 7.19-7.15 (m, 1 H);  $^{13}\text{C}$  NMR (100 MHz,  $\text{CDCl}_3$ )  $\delta$  149.1, 139.4, 136.7, 129.6, 127.5, 125.9, 122.8, 122.9, 119.7, 118.1, 106.3, 21.3.

## 7. Structure Determination (X-ray Crystallographic Data for 3p):

The white crystal of **3p** was obtained by crystallization from a solution in dichloromethane/petroleum ether after purification by column chromatography. Chemical Formula:  $\text{C}_{32}\text{H}_{25}\text{FN}_2\text{OSi}$ .

View of ORTEP (with 50% probability) diagram for the structure 5-fluoro-2-(4-methoxyphenyl)-3-(triphenylsilyl)-2*H*-indazole (**3p**).

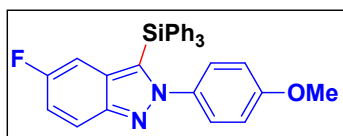

≡

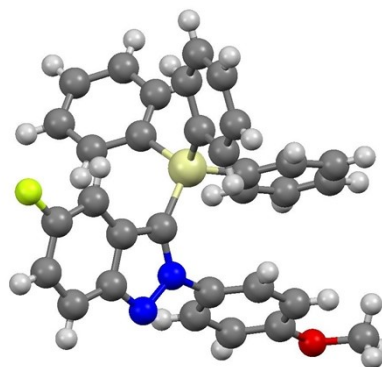

Datablock AKBKKD\_2 - ellipsoid plot

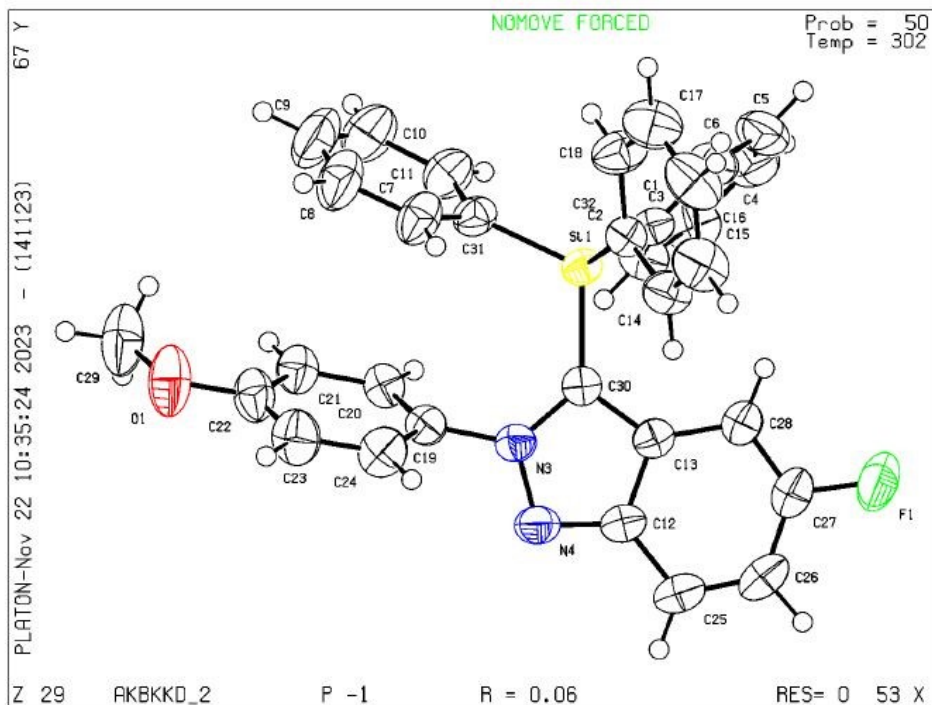

|                             |                                                     |                 |
|-----------------------------|-----------------------------------------------------|-----------------|
| <b>Wavelength</b>           | 0.71073 Å                                           |                 |
| <b>Formula</b>              | C <sub>32</sub> H <sub>25</sub> FN <sub>2</sub> OSi |                 |
| <b>Crystal system</b>       | Triclinic                                           |                 |
| <b>Space group</b>          | P -1                                                |                 |
| <b>Unit cell dimensions</b> | a = 9.840(2) Å                                      | α = 102.890(7)° |
|                             | b = 12.074(3) Å                                     | β = 107.408(7)° |
|                             | c = 13.093(3) Å                                     | γ = 110.200(6)° |
| <b>Volume</b>               | 1297.2 Å <sup>3</sup>                               |                 |
| <b>Z</b>                    | 2                                                   |                 |
| <b>R factor</b>             | 5.69                                                |                 |

The crystallographic data have been deposited with the Cambridge Crystallographic Data centre as a supplementary publication with a CCDC reference number 2308886.

## 8. References:

(1) (a) M. R. Kumar, A. Park, N. Park and S. Lee, *Org. Lett.*, 2011, **13**, 3542. (b) G. Bogonda, H. Y. Kim, K. Oh, *Org. Lett.*, 2018, **20**, 2711.

(2) C. Zarate, M. Nakajima and R. Martin, *J. Am. Chem. Soc.*, 2017, **139**, 1191.

(3) (a) A. Guerrero-Corella, A. M. Martinez-Gualda, F. Ahmadi, E. Ming, A. Fraile and J. Alemán, *J. Chem. Commun.*, 2017, **53**, 10463. (b) G. K. Fekarurhobo, S. S. Angaye and F. G. Obomann, *J. Emerg. Trends Engg. Appl. Sci.*, (JETEAS) 2013, **4**, 394.

(4) X. Liu, Z. Wu, C. Feng, W. Liu, M. Li and Z. Shen, *Eur. J. Org. Chem.*, 2022, **2022**, e202200262.

## **9. NMR Spectra for the Synthesized Products**

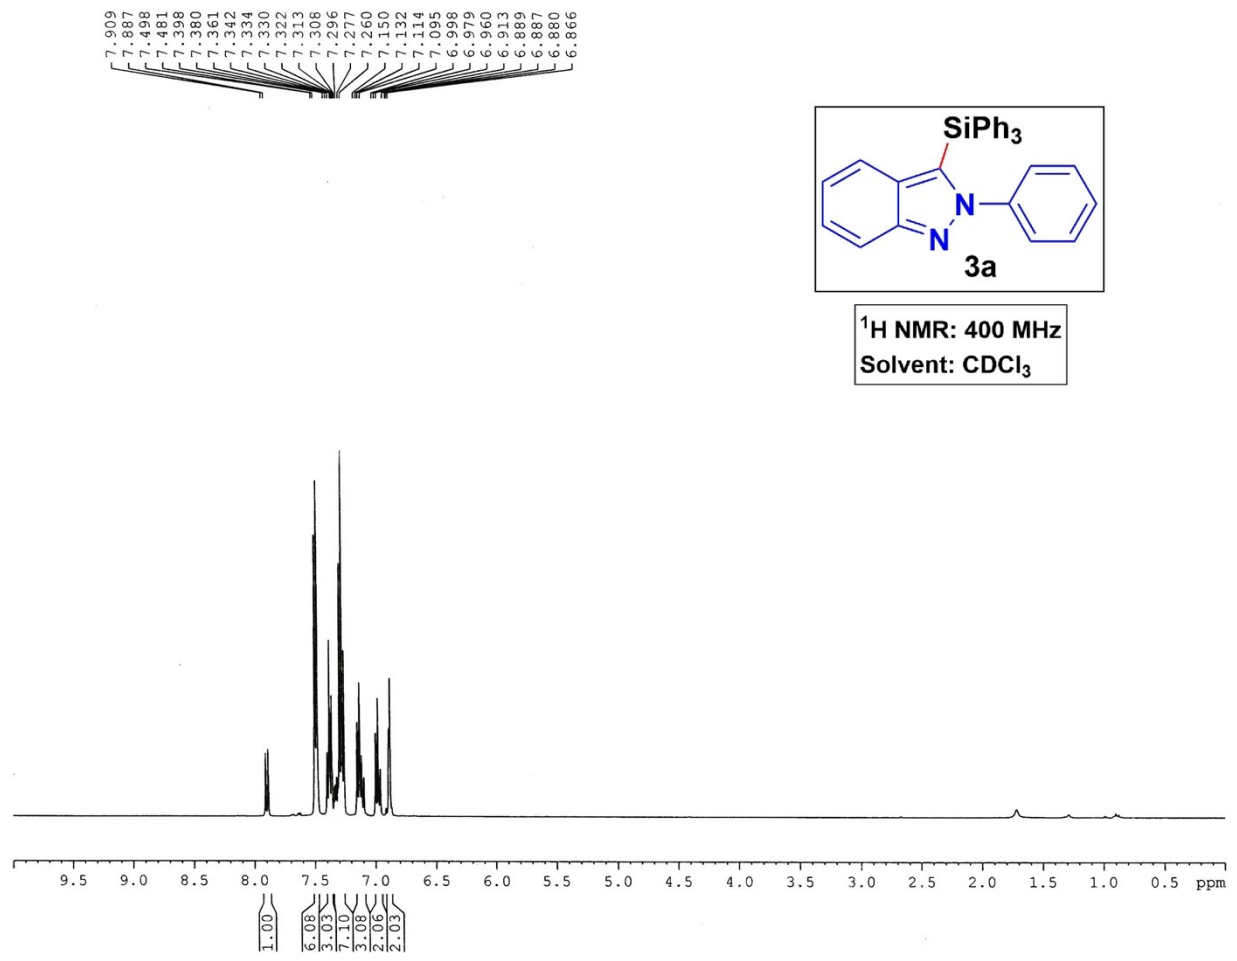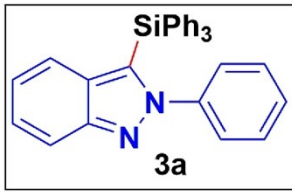

<sup>1</sup>H NMR: 400 MHz  
Solvent: CDCl<sub>3</sub>

Current Data Parameters  
NAME Dr. A HAJRA 2023 1H  
EXPNO 323  
PROCNO 1

F2 - Acquisition Parameters  
Date\_ 20230314  
Time 12.13  
INSTRUM spect  
PROBHD 5 mm PABBO BB/  
PULPROG zg30  
TD 32768  
SOLVENT CDCl3  
NS 8  
DS 2  
SWH 8223.685 Hz  
FIDRES 0.250967 Hz  
AQ 1.9922944 sec  
RG 77.59  
DW 60.800 usec  
DE 6.50 usec  
TE 296.8 K  
D1 1.00000000 sec  
TD0 1

===== CHANNEL f1 =====  
SFO1 400.1524711 MHz  
NUC1 1H  
P1 14.75 usec  
PLW1 12.00000000 W

F2 - Processing parameters  
SI 16384  
SF 400.1500089 MHz  
WDW EM  
SSB 0  
LB 0.30 Hz  
GB 0  
PC 1.00

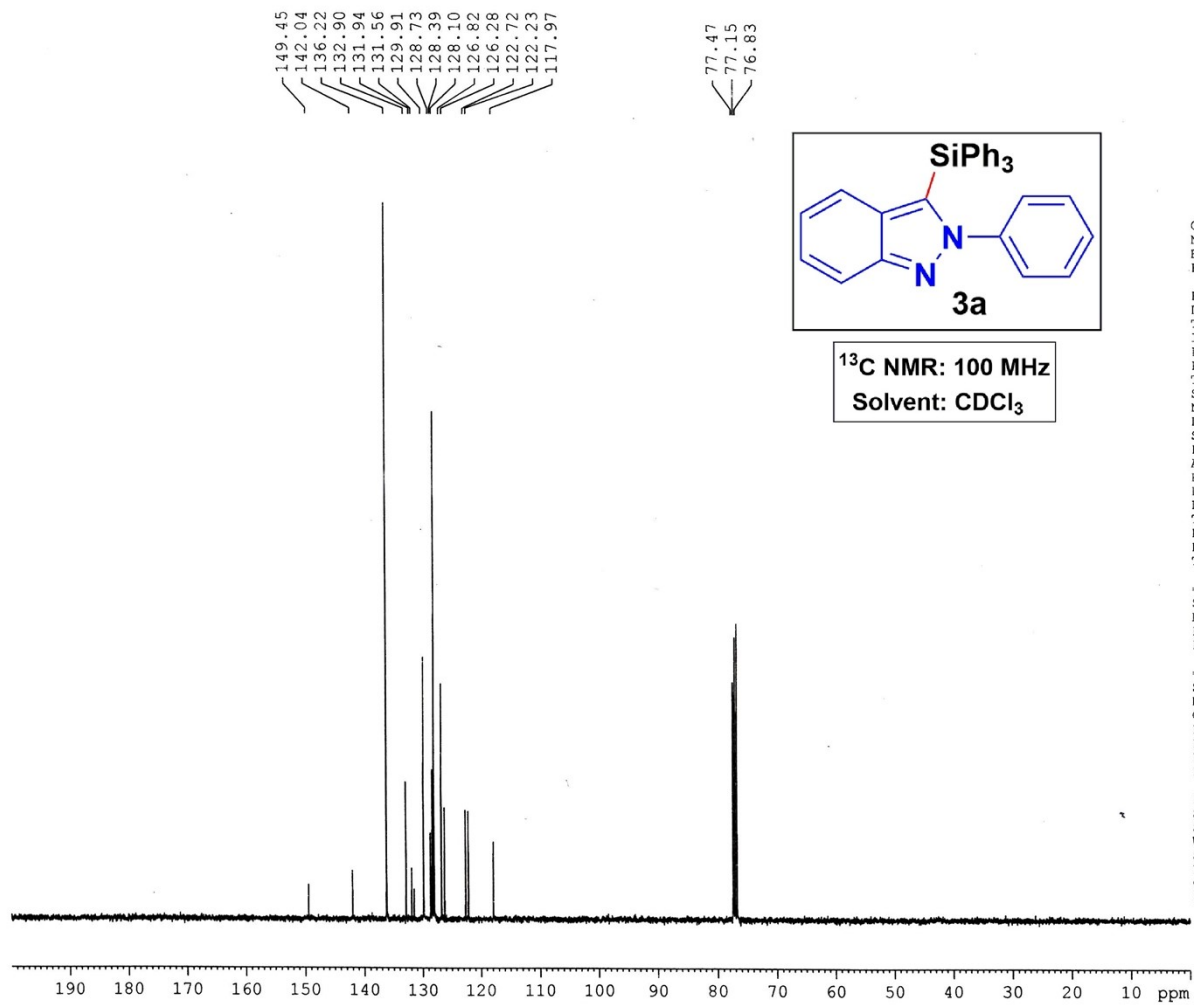

Current Data Parameters  
 NAME Dr. A HAJRA-2023-13C  
 EXPNO 83  
 PROCNO 1

F2 - Acquisition Parameters  
 Date\_ 20230314  
 Time 12.25  
 INSTRUM spect  
 PROBHD 5 mm PABBO BB/  
 PULPROG zgpg30  
 TD 32768  
 SOLVENT CDCl3  
 NS 192  
 DS 2  
 SWH 24038.461 Hz  
 FIDRES 0.733596 Hz  
 AQ 0.6815744 sec  
 RG 186.42  
 DW 20.800 usec  
 DE 6.50 usec  
 TE 297.0 K  
 D1 2.0000000 sec  
 D11 0.0300000 sec  
 TDO 1

===== CHANNEL f1 =====  
 SFO1 100.6279588 MHz  
 NUC1 13C  
 P1 8.90 usec  
 PLW1 54.0000000 W

===== CHANNEL f2 =====  
 SFO2 400.1516006 MHz  
 NUC2 1H  
 CPDPRG[2] waltz16  
 PCPD2 90.00 usec  
 PLW2 12.0000000 W  
 PLW12 0.32231000 W  
 PLW13 0.16212000 W

F2 - Processing parameters  
 SI 16384  
 SF 100.6177887 MHz  
 WDW EM  
 SSB 0  
 LB 1.00 Hz  
 GB 0  
 FC 1.40



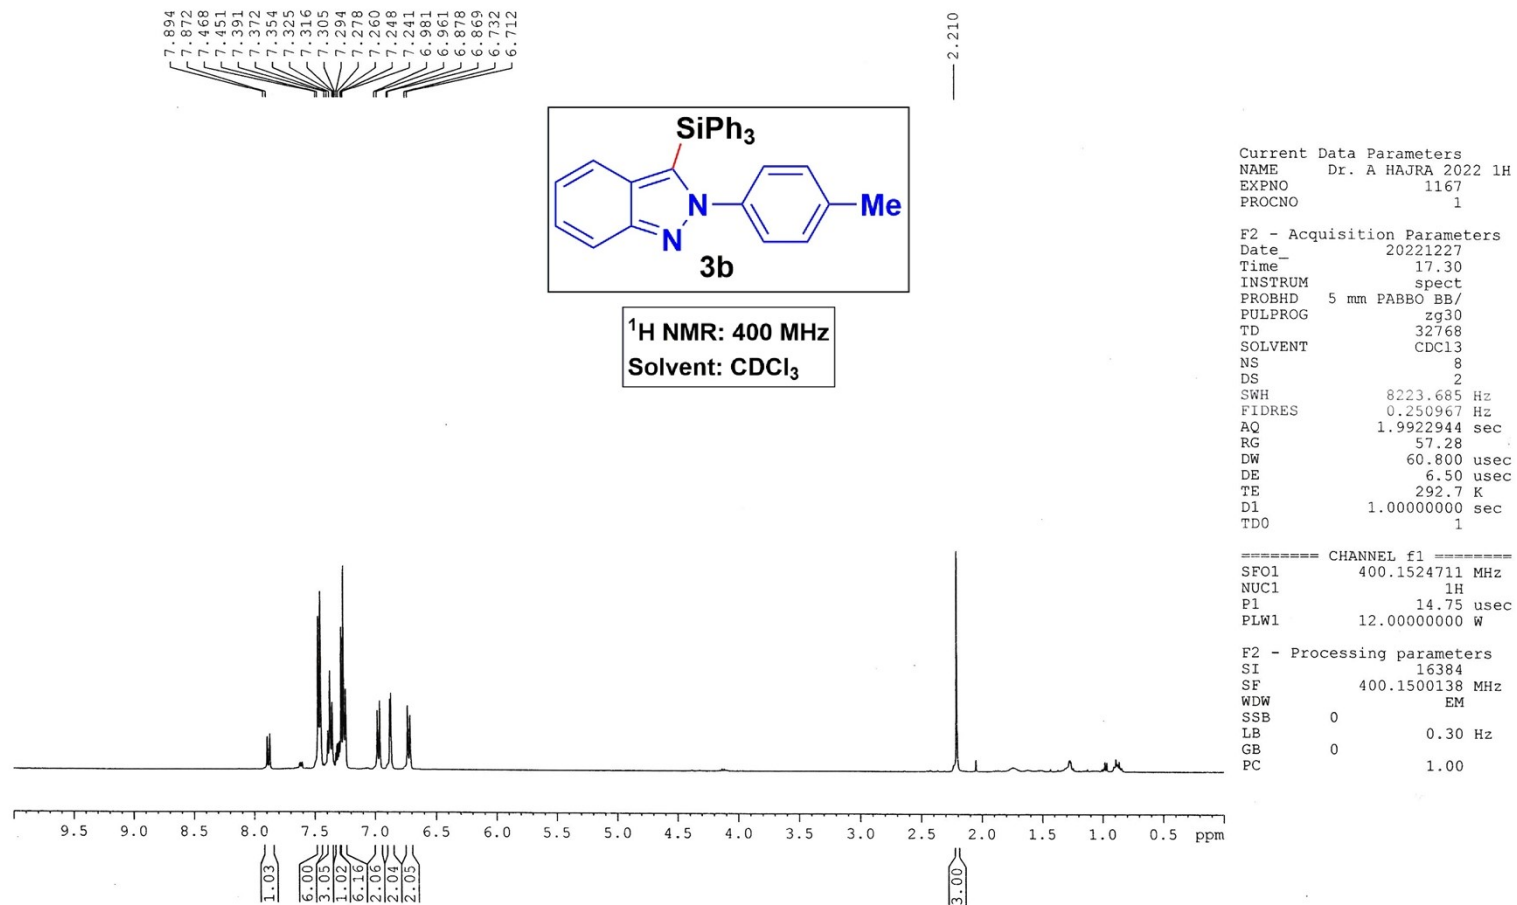

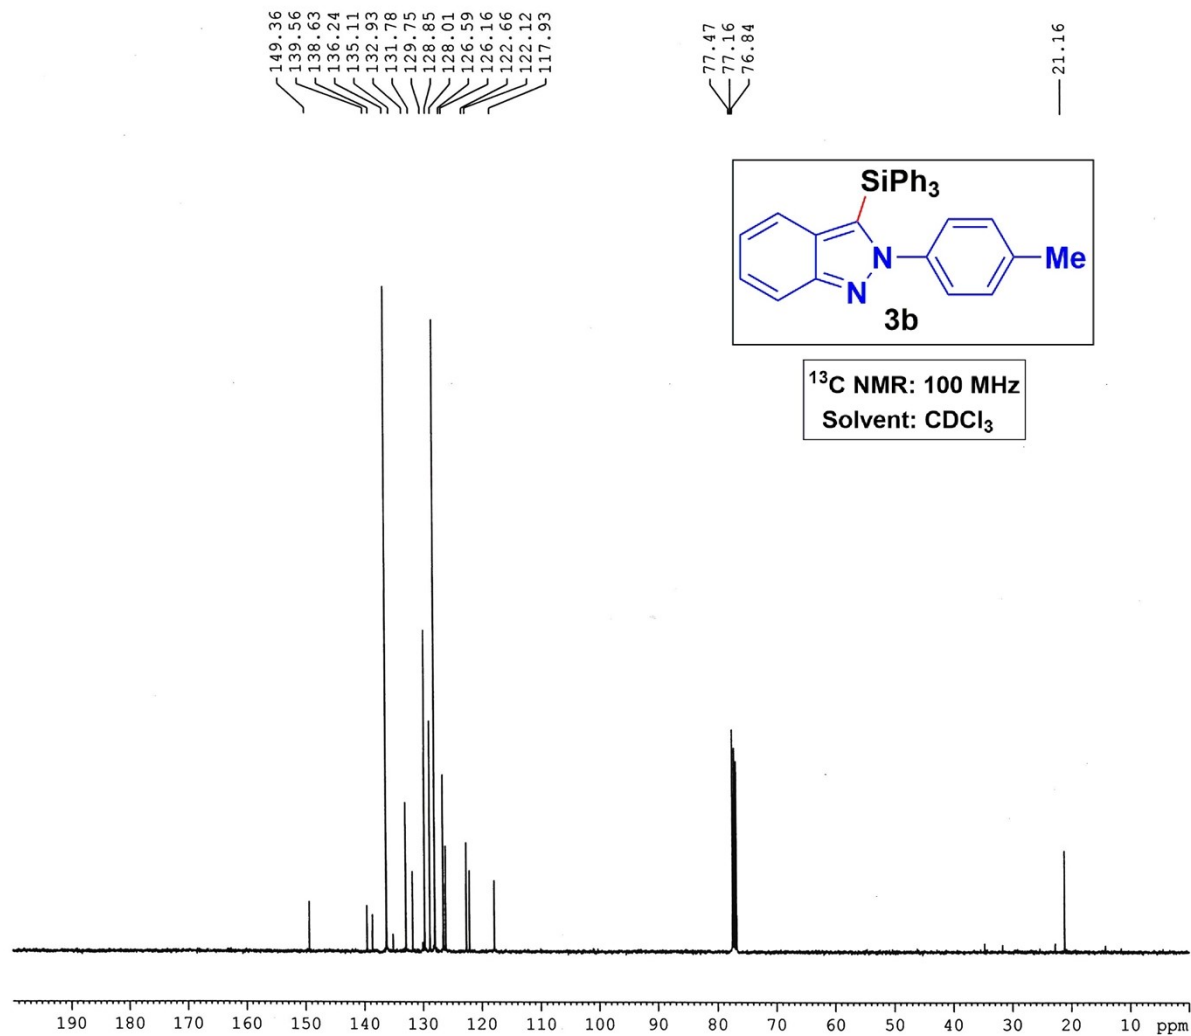

Current Data Parameters  
NAME Dr. A HAJRA-2022-13C  
EXPNO 464  
PROCNO 1

F2 - Acquisition Parameters  
Date\_ 20221227  
Time 17.55  
INSTRUM spect  
PROBHD 5 mm PABBO BB/  
PULPROG zgpg30  
TD 32768  
SOLVENT CDCl3  
NS 400  
DS 2  
SWH 24038.461 Hz  
FIDRES 0.733596 Hz  
AQ 0.6815744 sec  
RG 186.42  
DW 20.800 usec  
DE 6.50 usec  
TE 292.9 K  
D1 2.00000000 sec  
D11 0.03000000 sec  
TD0 1

===== CHANNEL f1 =====  
SFO1 100.6278598 MHz  
NUC1 13C  
P1 8.90 usec  
PLW1 54.00000000 W

===== CHANNEL f2 =====  
SFO2 400.1516006 MHz  
NUC2 1H  
CPDPRG(2) waltz16  
PCPD2 90.00 usec  
PLW2 12.00000000 W  
PLW12 0.32231000 W  
PLW13 0.16212000 W

F2 - Processing parameters  
SI 16384  
SF 100.6177902 MHz  
WDW EM  
SSB 0  
LB 1.00 Hz  
GB 0  
PC 1.40

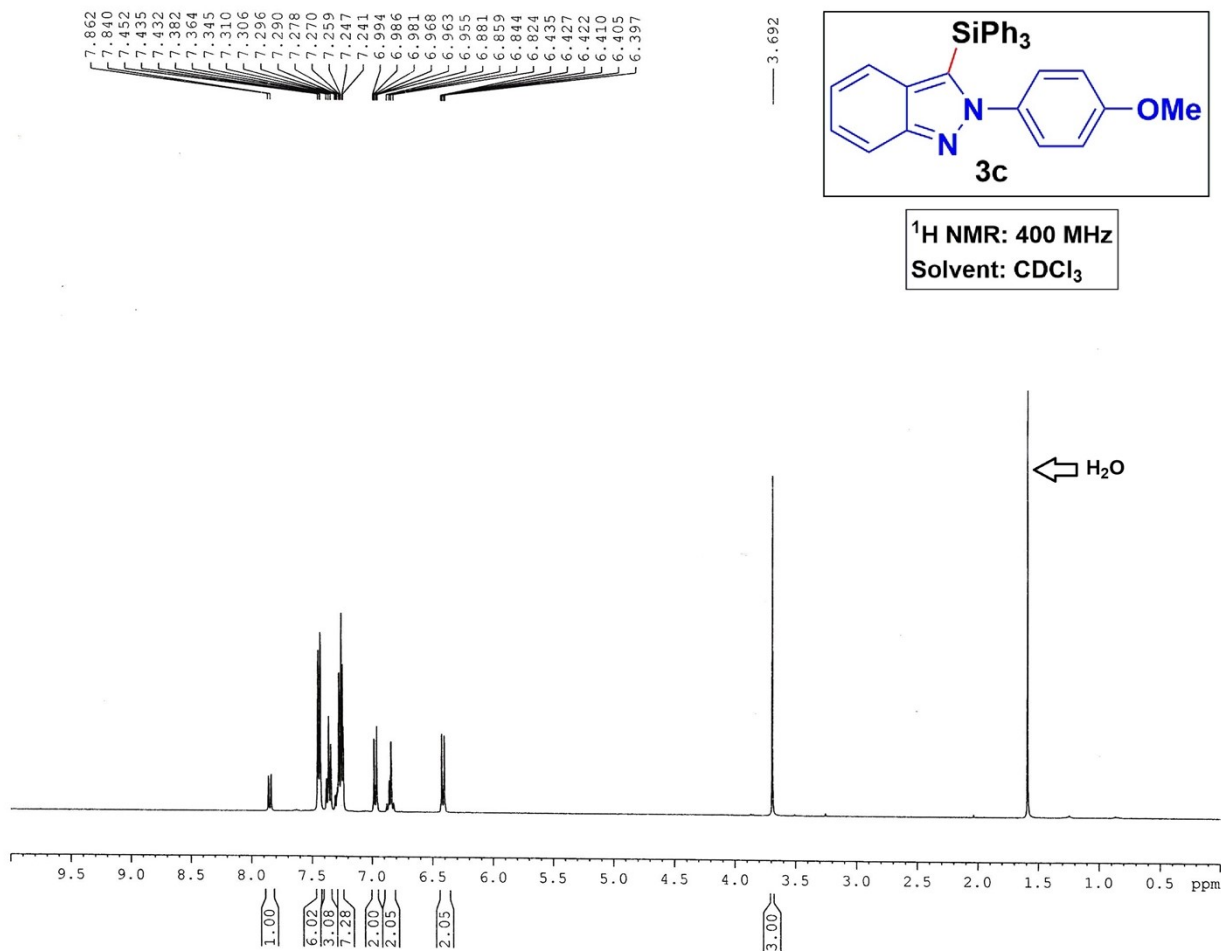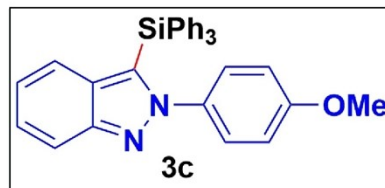

<sup>1</sup>H NMR: 400 MHz  
Solvent: CDCl<sub>3</sub>

Current Data Parameters  
NAME Dr. A HAJRA 2023 1H  
EXPNO 24  
PROCNO 1

F2 - Acquisition Parameters  
Date\_ 20230114  
Time 17.51  
INSTRUM spect  
PROBHD 5 mm PABBO BB/  
PULPROG zg30  
TD 32768  
SOLVENT CDCl3  
NS 8  
DS 2  
SWH 8223.685 Hz  
FIDRES 0.250967 Hz  
AQ 1.9922944 sec  
RG 148.91  
DW 60.800 usec  
DE 6.50 usec  
TE 289.8 K  
D1 1.00000000 sec  
TDO 1

===== CHANNEL f1 =====  
SF01 400.1524711 MHz  
NUC1 1H  
P1 14.75 usec  
PLW1 12.00000000 W

F2 - Processing parameters  
SI 16384  
SF 400.1500147 MHz  
WDW EM  
SSB 0  
LB 0.30 Hz  
GB 0  
PC 1.00

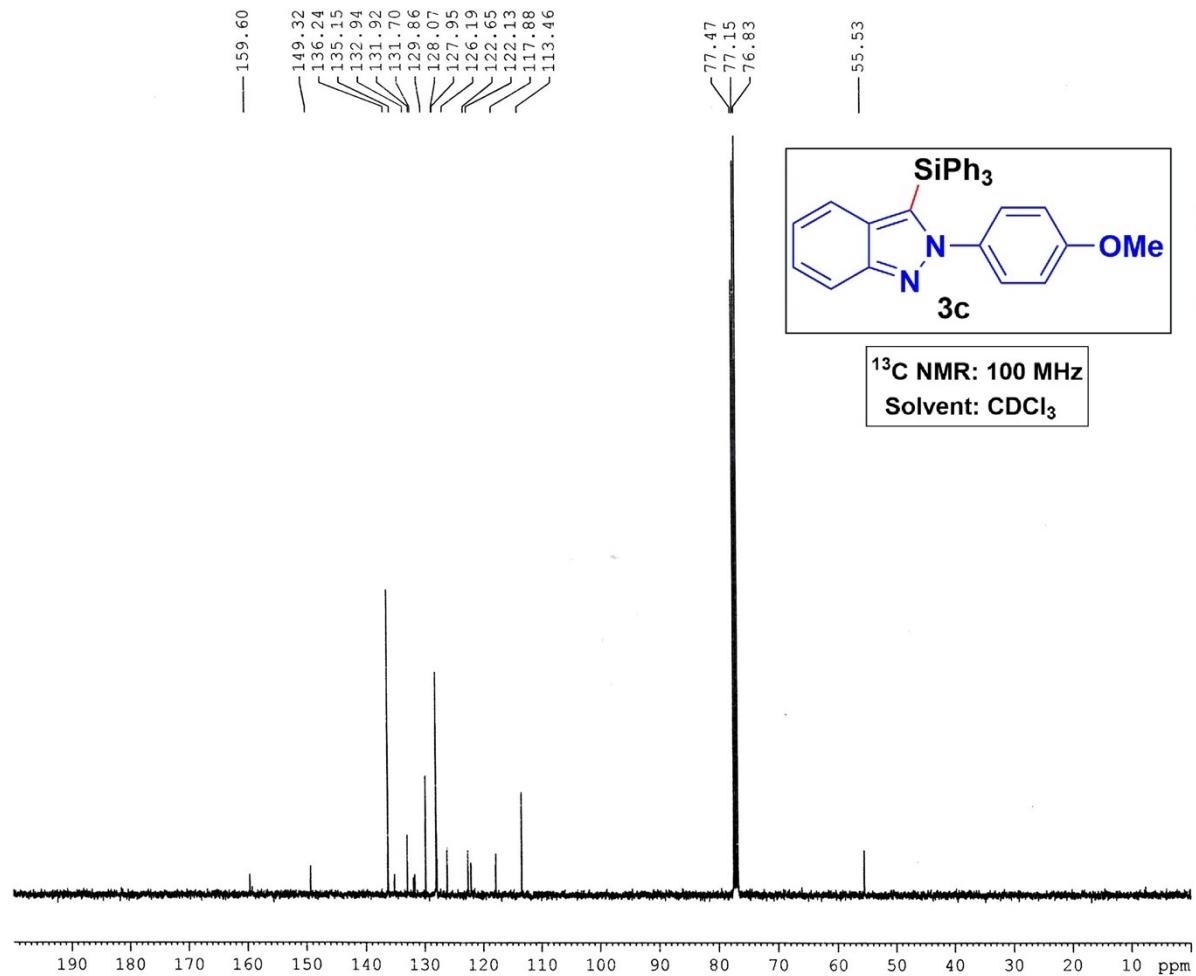

Current Data Parameters  
 NAME Dr. A HAJRA-2023-13C  
 EXPNO 13  
 PROCNO 1

F2 - Acquisition Parameters  
 Date\_ 20230114  
 Time\_ 18.43  
 INSTRUM spect  
 PROBHD 5 mm PABBO BB/  
 PULPROG zgpg30  
 TD 32768  
 SOLVENT CDCl3  
 NS 750  
 DS 2  
 SWH 24038.461 Hz  
 FIDRES 0.733596 Hz  
 AQ 0.6815744 sec  
 RG 186.42  
 DW 20.800 usec  
 DE 6.50 usec  
 TE 290.2 K  
 D1 2.0000000 sec  
 D11 0.0300000 sec  
 TDO 1

===== CHANNEL f1 =====  
 SF01 100.6278588 MHz  
 NUC1 13C  
 P1 8.90 usec  
 PLW1 54.0000000 W

===== CHANNEL f2 =====  
 SF02 400.1516006 MHz  
 NUC2 1H  
 CPDPRG[2] waltz16  
 PCPD2 90.00 usec  
 FLW2 12.0000000 W  
 PLW12 0.32231000 W  
 PLW13 0.16212000 W

F2 - Processing parameters  
 SI 16384  
 SF 100.6177873 MHz  
 WDW EM  
 SSB 0  
 LB 1.00 Hz  
 GB 0  
 PC 1.40

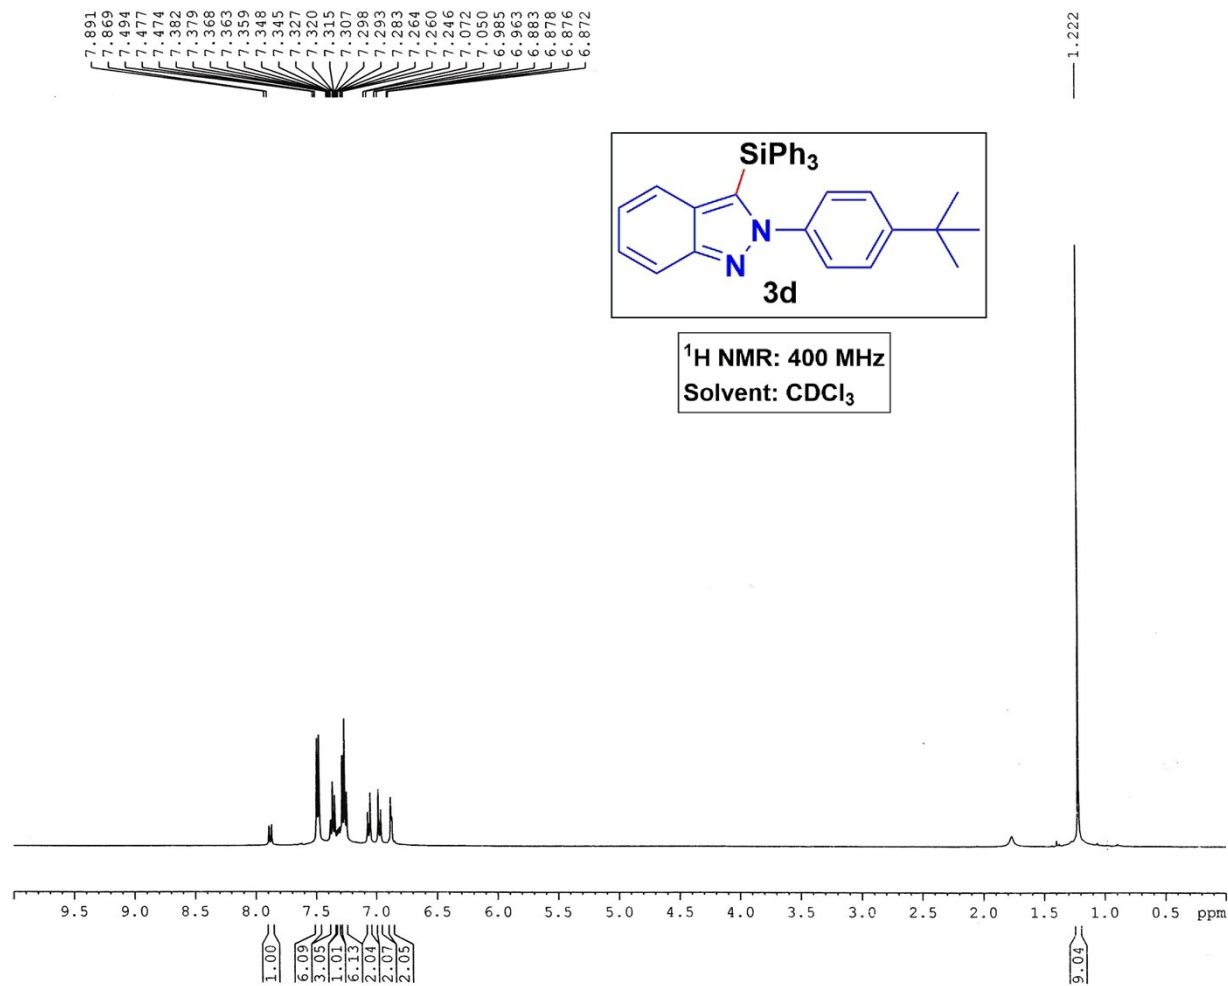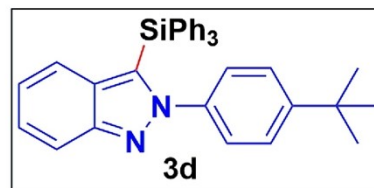

<sup>1</sup>H NMR: 400 MHz  
Solvent: CDCl<sub>3</sub>

Current Data Parameters  
NAME Dr. A HAJRA 2023 1H  
EXPNO 911  
PROCNO 1

F2 - Acquisition Parameters  
Date\_ 20230729  
Time 17.43  
INSTRUM spect  
PROBHD 5 mm PABBO BB/  
PULPROG zg30  
TD 32768  
SOLVENT CDCl3  
NS 8  
DS 2  
SWH 8223.685 Hz  
FIDRES 0.250967 Hz  
AQ 1.9922944 sec  
RG 77.59  
DW 60.800 usec  
DE 6.50 usec  
TE 298.6 K  
D1 1.00000000 sec  
TDO 1

===== CHANNEL f1 =====  
SFO1 400.1524711 MHz  
NUC1 1H  
P1 14.75 usec  
PLW1 12.00000000 W

F2 - Processing parameters  
SI 16384  
SF 400.1500097 MHz  
WDW EM  
SSB 0  
LB 0.30 Hz  
GB 0  
PC 1.00

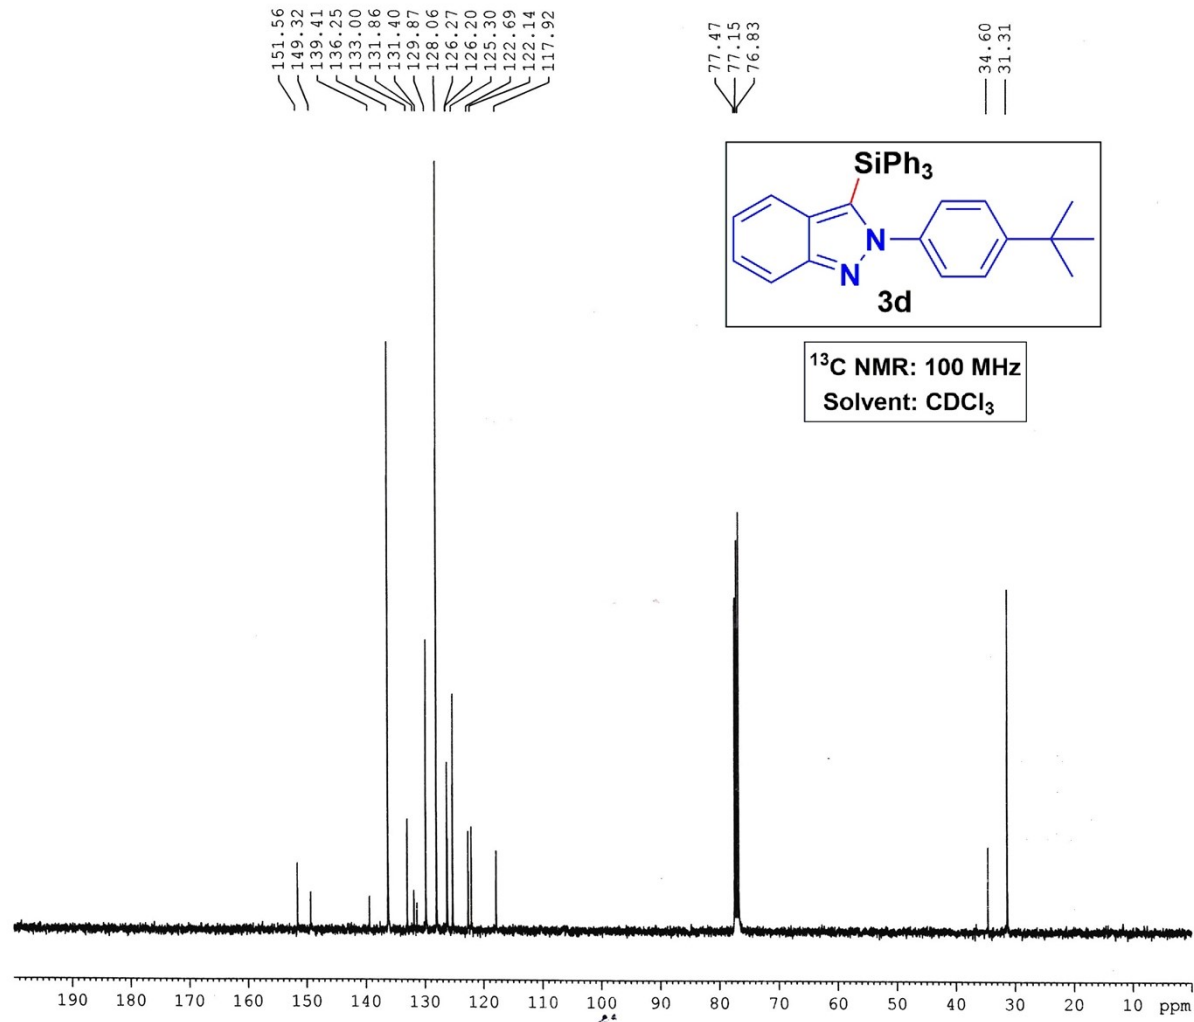

Current Data Parameters  
 NAME Dr. A HAJRA-2023-13C  
 EXPNO 309  
 PROCNO 1

F2 - Acquisition Parameters  
 Date\_ 20230729  
 Time 18.02  
 INSTRUM spect  
 PROBHD 5 mm PABBO BB/  
 PULPROG zgpg30  
 TD 32768  
 SOLVENT CDCl3  
 NS 320  
 DS 2  
 SWH 24038.461 Hz  
 FIDRES 0.733596 Hz  
 AQ 0.6815744 sec  
 RG 186.42  
 DW 20.800 usec  
 DE 6.50 usec  
 TE 298.7 K  
 D1 2.0000000 sec  
 D11 0.0300000 sec  
 TD0 1

----- CHANNEL f1 -----  
 SFO1 100.6278588 MHz  
 NUC1 13C  
 P1 8.90 usec  
 PLW1 54.0000000 W

----- CHANNEL f2 -----  
 SFO2 400.1516006 MHz  
 NUC2 1H  
 CPDPRG[2] waltz16  
 PCPD2 90.00 usec  
 PLW2 12.0000000 W  
 PLW12 0.32231000 W  
 PLW13 0.16212000 W

F2 - Processing parameters  
 SI 16384  
 SF 100.6177873 MHz  
 WDW EM  
 SSB 0  
 LB 1.00 Hz  
 GB 0  
 PC 1.40

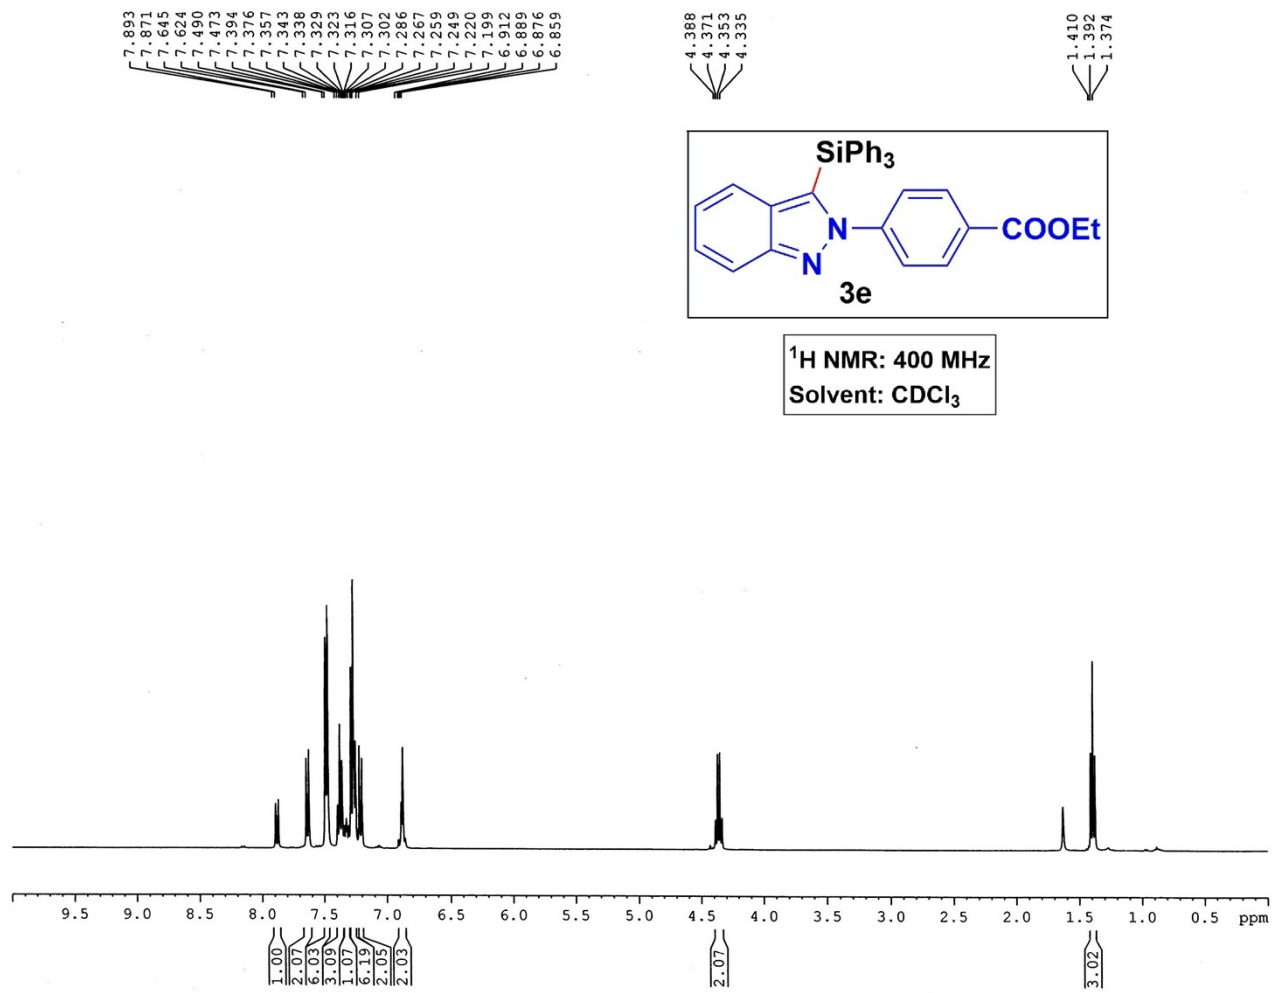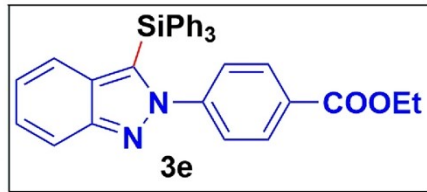

<sup>1</sup>H NMR: 400 MHz  
 Solvent: CDCl<sub>3</sub>

```

Current Data Parameters
NAME      Dr. A HAJRA 2023 1H
EXPNO    381
PROCNO   1

F2 - Acquisition Parameters
Date_    20230327
Time     16.40
INSTRUM  spect
PROBHD   5 mm PABBO BB/
PULPROG  zg30
TD       32768
SOLVENT  CDCl3
NS       8
DS       2
SWH      8223.685 Hz
FIDRES   0.250967 Hz
AQ       1.9922944 sec
RG       87.66
DW       60.800 usec
DE       6.50 usec
TE       296.4 K
D1       1.00000000 sec
TD0      1

===== CHANNEL f1 =====
SF01    400.1524711 MHz
NUC1     1H
P1       14.75 usec
PLW1    12.00000000 W

F2 - Processing parameters
SI       16384
SF       400.1500097 MHz
WDW      EM
SSB      0
LB       0.30 Hz
GB       0
PC       1.00
    
```

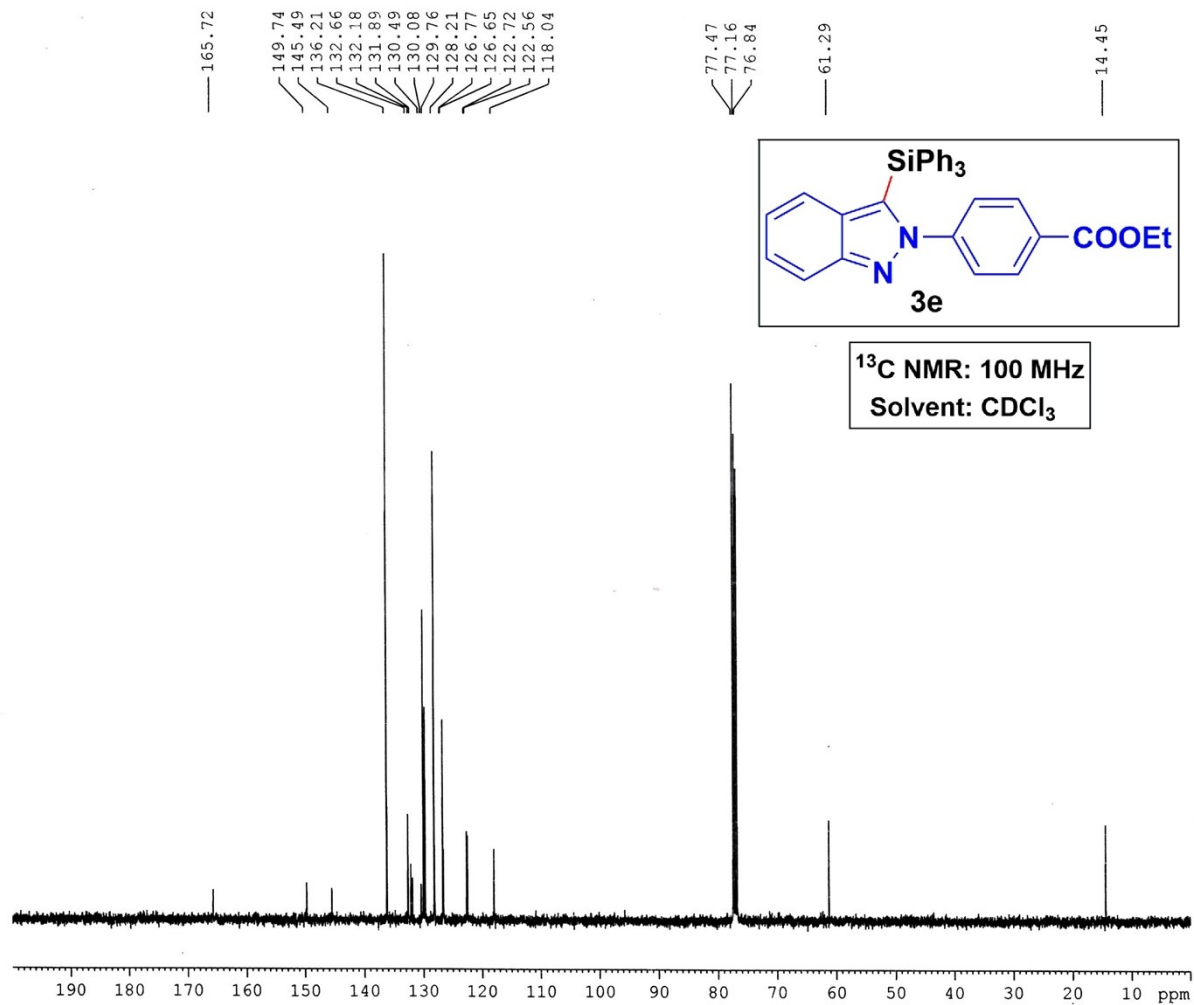

Current Data Parameters  
 NAME Dr. A HAJRA-2023-13C  
 EXPNO 106  
 PROCNO 1

F2 - Acquisition Parameters  
 Date\_ 20230327  
 Time 16.57  
 INSTRUM spect  
 PROBHD 5 mm PABBO BB/  
 PULPROG zgpg30  
 TD 32768  
 SOLVENT CDCl3  
 NS 210  
 DS 2  
 SWH 24038.461 Hz  
 FIDRES 0.733596 Hz  
 AQ 0.6615744 sec  
 RG 186.42  
 DW 20.800 usec  
 DE 6.50 usec  
 TE 296.9 K  
 D1 2.00000000 sec  
 D11 0.03000000 sec  
 TDO 1

----- CHANNEL f1 -----  
 SFO1 100.6278588 MHz  
 NUC1 13C  
 P1 8.90 usec  
 PLW1 54.00000000 W

----- CHANNEL f2 -----  
 SFO2 400.1516006 MHz  
 NUC2 1H  
 CPDPRG[2] waltz16  
 PCPD2 90.00 usec  
 PLW2 12.00000000 W  
 PLW12 0.32231000 W  
 PLW13 0.16212000 W

F2 - Processing parameters  
 SI 16384  
 SF 100.6177858 MHz  
 WDW EM  
 SSB 0  
 LB 1.00 Hz  
 GB 0  
 PC 1.40



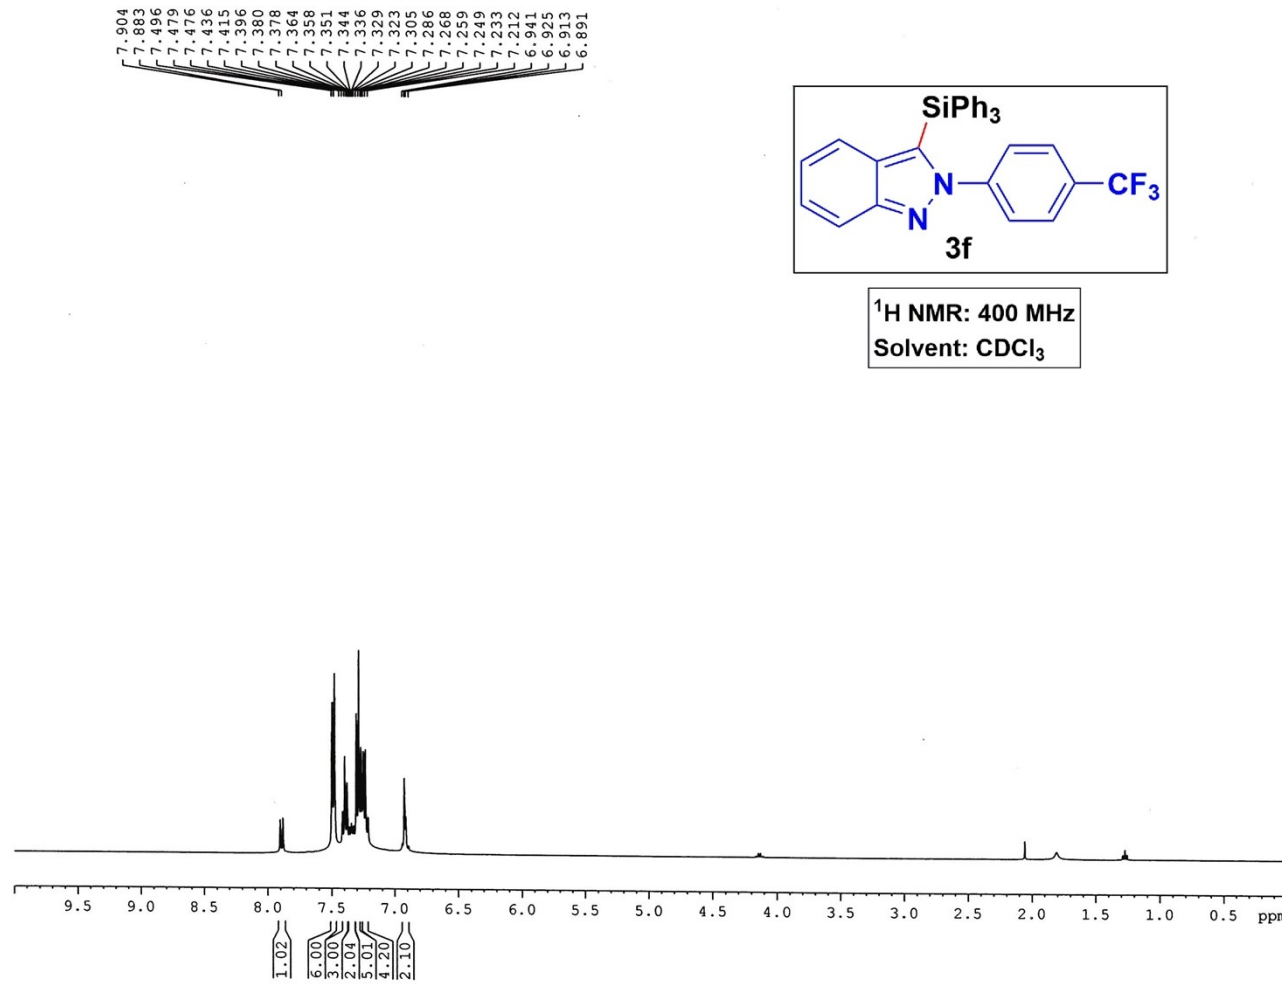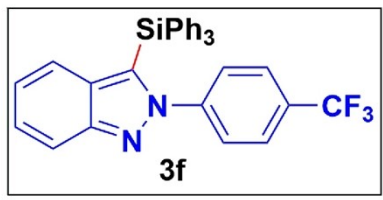

<sup>1</sup>H NMR: 400 MHz  
Solvent: CDCl<sub>3</sub>

```

Current Data Parameters
NAME      Dr. A HAJRA 2023 1H
EXPNO     692
PROCNO    1

F2 - Acquisition Parameters
Date_     20230615
Time      10.56
INSTRUM   spect
PROBHD    5 mm PABBO BB/
PULPROG   zg30
TD         32768
SOLVENT   CDC13
NS         8
DS         2
SWH       8223.685 Hz
FIDRES    0.250967 Hz
AQ         1.9922944 sec
RG         57.28
DW         60.800 usec
DE         6.50 usec
TE         299.2 K
D1         1.00000000 sec
TD0        1

===== CHANNEL f1 =====
SFO1      400.1524711 MHz
NUC1      1H
P1        14.75 usec
PLW1      12.00000000 W

F2 - Processing parameters
SI         16384
SF         400.1500102 MHz
WDW        EM
SSB        0
LB         0.30 Hz
GB         0
PC         1.00

```

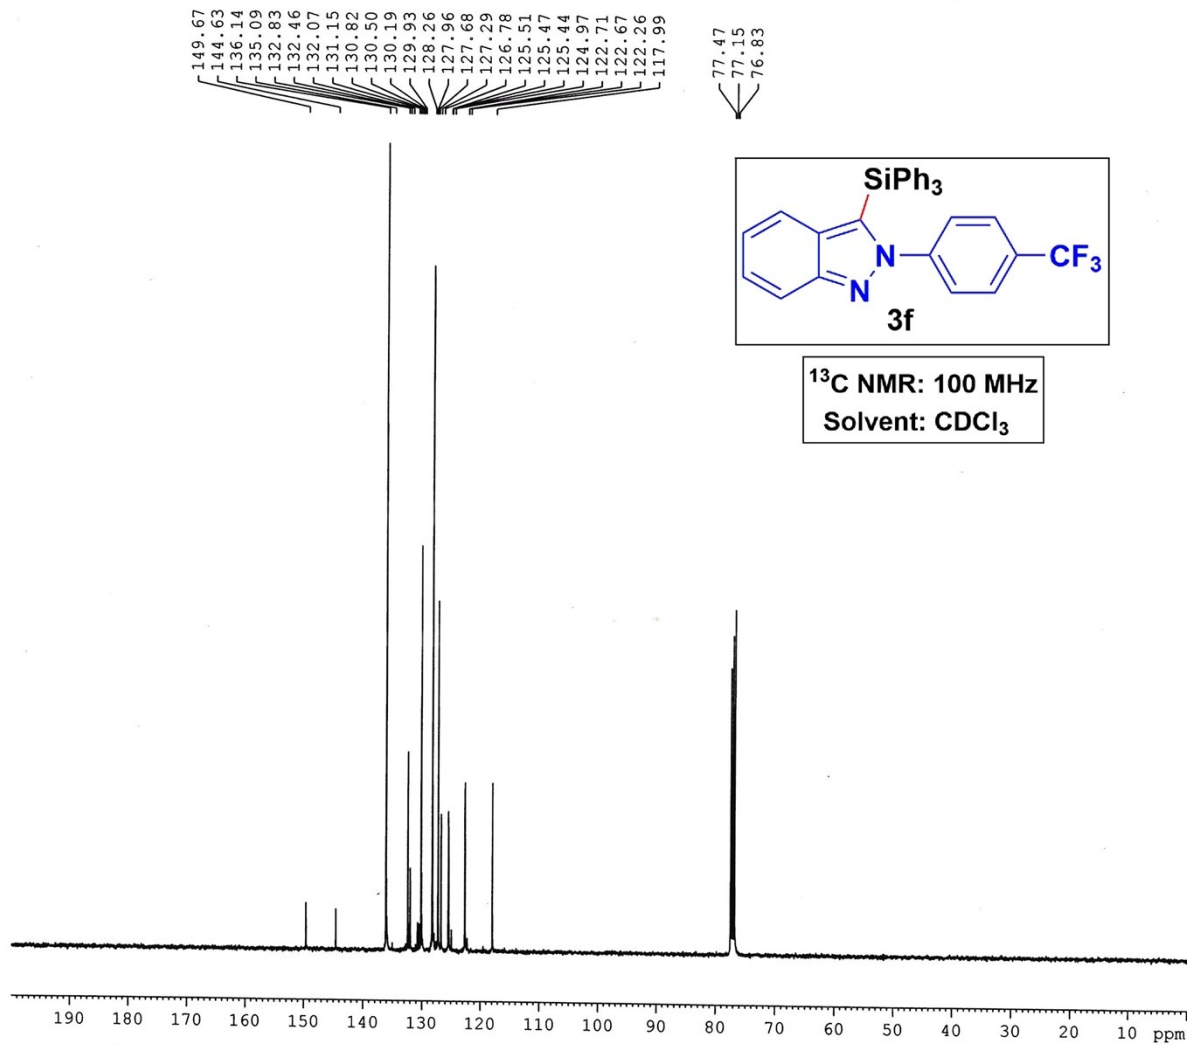

Current Data Parameters  
NAME Dr. A HAJRA-2023-13C  
EXPNO 436  
PROCNO 1

F2 - Acquisition Parameters  
Date\_ 20231119  
Time 11.18  
INSTRUM spect  
FROBHD 5 mm PABBO BB/  
PULPROG zgpg30  
TD 32768  
SOLVENT CDCl3  
NS 1200  
DS 2  
SWH 24038.461 Hz  
FIDRES 0.733596 Hz  
AQ 0.6815744 sec  
RG 186.42  
DW 20.800 usec  
DE 6.50 usec  
TE 292.9 K  
D1 2.00000000 sec  
D11 0.03000000 sec  
TD0 1

----- CHANNEL f1 -----  
SFO1 100.6278588 MHz  
NUC1 13C  
P1 8.90 usec  
PLW1 54.00000000 W

----- CHANNEL f2 -----  
SFO2 400.1516006 MHz  
NUC2 1H  
CPDPRG[2] waltz16  
PCPD2 90.00 usec  
PLW2 12.00000000 W  
PLW12 0.32231000 W  
PLW13 0.16212000 W

F2 - Processing parameters  
SI 16384  
SF 100.6177898 MHz  
WDW EM  
SSB 0  
LB 1.00 Hz  
GB 0  
PC 1.40

7.757  
7.735  
7.735  
7.357  
7.340  
7.338  
7.296  
7.277  
7.259  
7.220  
7.215  
7.206  
7.199  
7.188  
7.169  
7.151  
7.135  
6.854  
6.842  
6.938  
6.932  
6.925  
6.920  
6.792  
6.771  
6.756  
6.737  
6.531  
6.522  
6.501  
6.484  
6.479

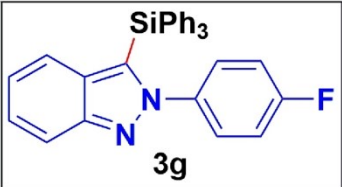

**<sup>1</sup>H NMR: 400 MHz**  
**Solvent: CDCl<sub>3</sub>**

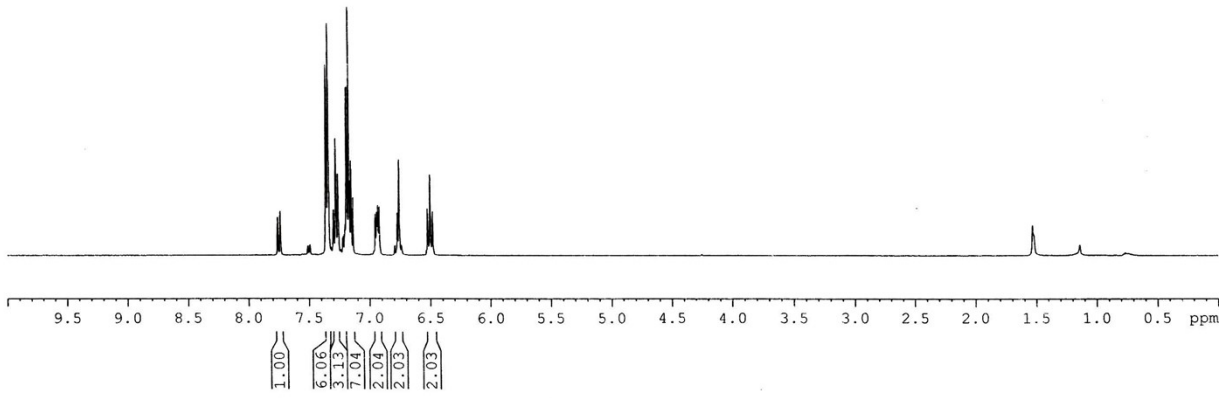

```

Current Data Parameters
NAME      Dr. A HAJRA 2023 1H
EXPNO     2
PROCNO    1

F2 - Acquisition Parameters
Date_     20230103
Time      18.20
INSTRUM   spect
PROBHD    5 mm PABBO BB/
PULPROG   zg30
TD         32768
SOLVENT   CDCl3
NS         8
DS         2
SWH        8223.685 Hz
FIDRES     0.250967 Hz
AQ         1.9922944 sec
RG         87.66
DW         60.800 usec
DE         6.50 usec
TE         290.8 K
D1         1.00000000 sec
TDO        1

===== CHANNEL f1 =====
SF01      400.1524711 MHz
NUC1       1H
P1         14.75 usec
PLW1      12.00000000 W

F2 - Processing parameters
SI         16364
SF         400.1500597 MHz
WDW        EM
SSB        0
LB         0.30 Hz
GB         0
PC         1.00
  
```

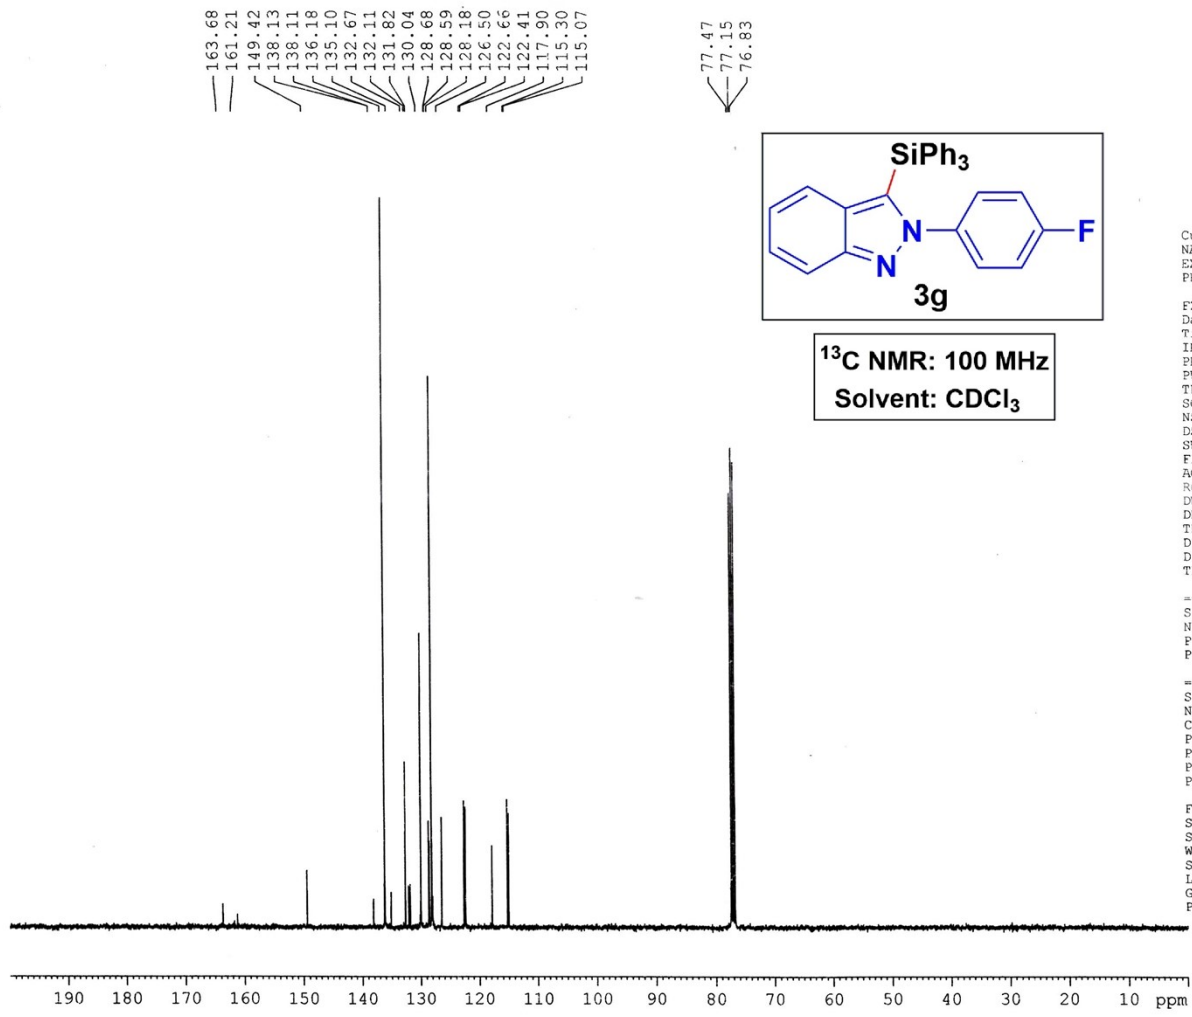

Current Data Parameters  
 NAME Dr. A HAJRA-2023-13C  
 EXPNO 2  
 PROCNO 1

F2 - Acquisition Parameters  
 Date\_ 20230103  
 Time 19.05  
 INSTRUM spect  
 PROBHD 5 mm FABBO BE/  
 PULPROG zgpg30  
 TD 32768  
 SOLVENT CDCl3  
 NS 750  
 DS 2  
 SWH 24038.461 Hz  
 FIDRES 0.733596 Hz  
 AQ 0.6815744 sec  
 RG 186.42  
 DW 20.800 usec  
 DE 6.50 usec  
 TE 291.2 K  
 DI 2.00000000 sec  
 D11 0.03000000 sec  
 TD0 1

===== CHANNEL f1 =====  
 SFO1 100.6278588 MHz  
 NUC1 13C  
 P1 8.90 usec  
 PLW1 54.00000000 W

===== CHANNEL f2 =====  
 SFO2 400.1516006 MHz  
 NUC2 1H  
 CPDPRG[2] waltz16  
 PCPD2 90.00 usec  
 PLW2 12.00000000 W  
 PLW12 0.32231000 W  
 PLW13 0.16212000 W

F2 - Processing parameters  
 SI 16384  
 SF 100.6177887 MHz  
 WDW EM  
 SSB 0  
 LB 1.00 Hz  
 GB 0  
 PC 1.40

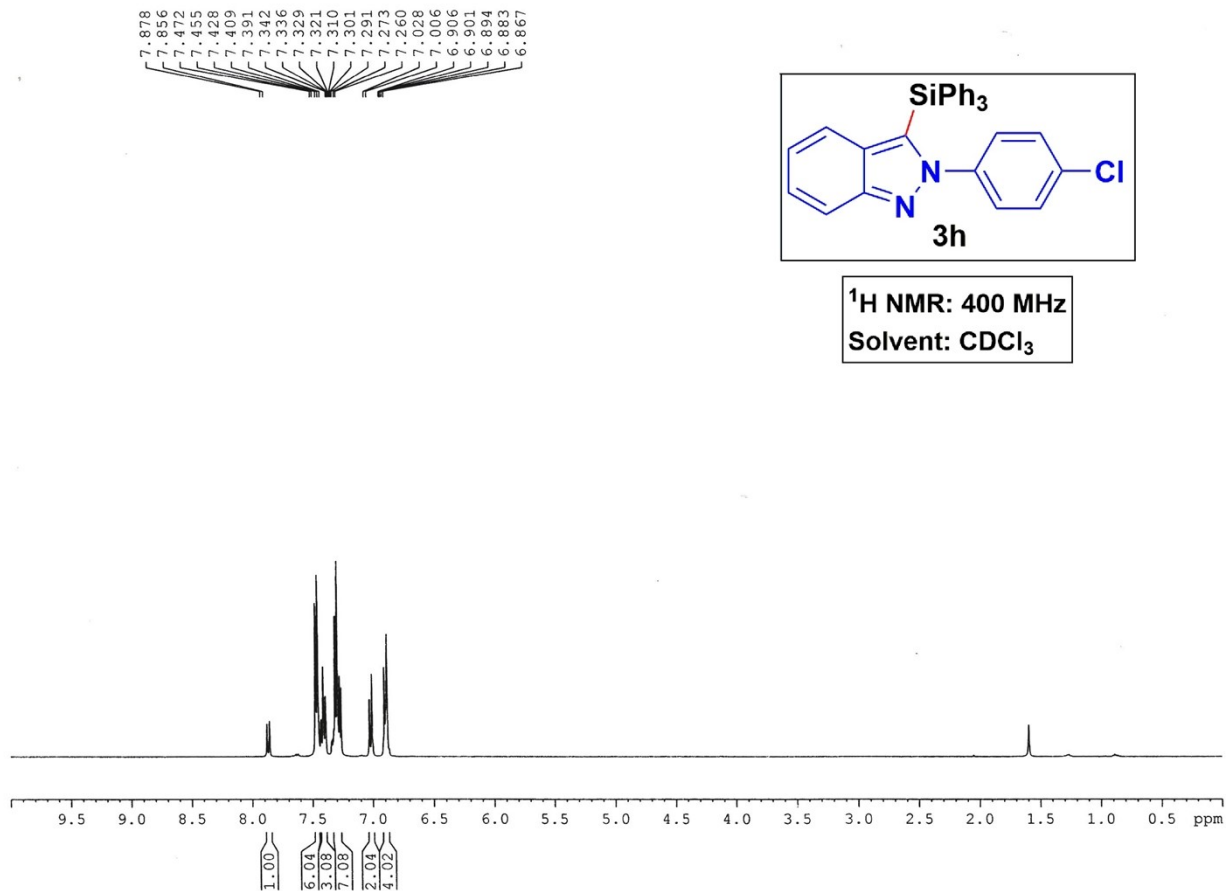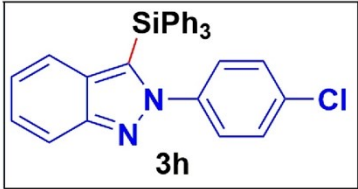

<sup>1</sup>H NMR: 400 MHz  
Solvent: CDCl<sub>3</sub>

Current Data Parameters  
NAME Dr. A HAJRA 2023 1H  
EXPNO 194  
PROCNO 1

F2 - Acquisition Parameters  
Date\_ 20230223  
Time 19.49  
INSTRUM spect  
PROBHD 5 mm PABBO BB/  
PULPROG zg30  
TD 32768  
SOLVENT CDCl<sub>3</sub>  
NS 8  
DS 2  
SWH 8223.685 Hz  
FIDRES 0.250967 Hz  
AQ 1.9922944 sec  
RG 135.7  
DW 60.800 usec  
DE 6.50 usec  
TE 294.5 K  
D1 1.00000000 sec  
TD0 1

===== CHANNEL f1 =====  
SF01 400.1524711 MHz  
NUC1 1H  
P1 14.75 usec  
PLW1 12.00000000 W

F2 - Processing parameters  
SI 16384  
SF 400.1500092 MHz  
WDW EM  
SSB 0  
LB 0.30 Hz  
GB 0  
PC 1.00

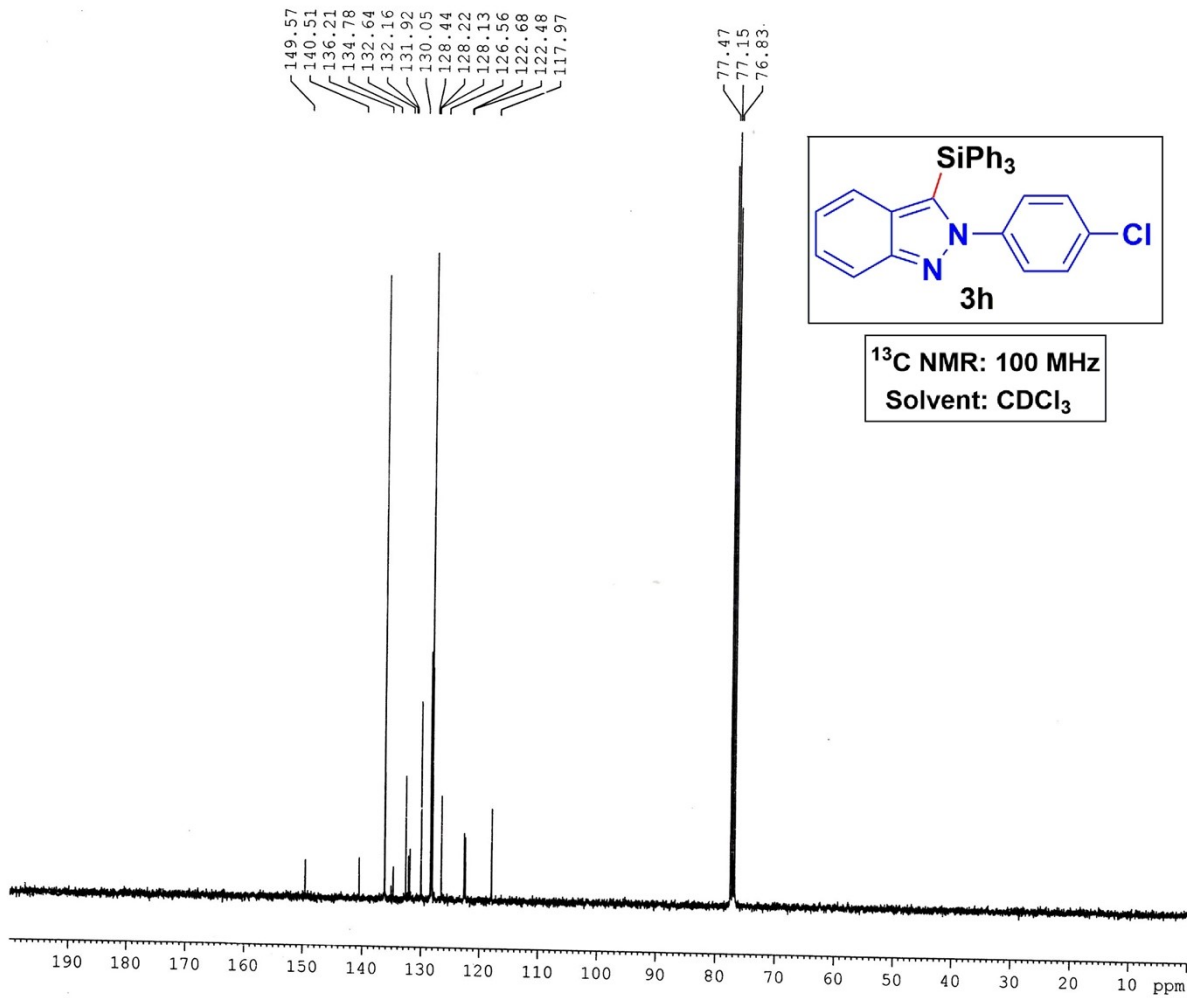

Current Data Parameters  
 NAME Dr. A HAJRA-2023-13C  
 EXPNO 64  
 PROCNO 1

F2 - Acquisition Parameters  
 Date\_ 20230223  
 Time 20.32  
 INSTRUM spect  
 PROBHD 5 mm PABBO BB/  
 PULPROG zgpg30  
 TD 32768  
 SOLVENT CDCl3  
 NS 800  
 DS 2  
 SWH 24038.461 Hz  
 FIDRES 0.733596 Hz  
 AQ 0.6815744 sec  
 RG 186.42  
 TM 20.800 usec  
 DE 6.50 usec  
 TE 295.0 K  
 D1 2.00000000 sec  
 D11 0.03000000 sec  
 TDO 1

----- CHANNEL f1 -----  
 SFO1 100.6278588 MHz  
 NUC1 13C  
 P1 8.90 usec  
 PLW1 54.00000000 W

----- CHANNEL f2 -----  
 SFO2 400.1516006 MHz  
 NUC2 1H  
 CPDPRG[2] waltz16  
 PCPD2 90.00 usec  
 PLW2 12.00000000 W  
 PLW12 0.32231000 W  
 PLW13 0.16212000 W

F2 - Processing parameters  
 SI 16384  
 SF 100.6177858 MHz  
 WDW EM  
 SSB 0  
 LB 1.00 Hz  
 GB 0  
 PC 1.40

7.877  
7.855  
7.468  
7.450  
7.432  
7.413  
7.395  
7.335  
7.330  
7.322  
7.311  
7.292  
7.274  
7.260  
7.060  
7.039  
6.963  
6.942  
6.917  
6.894  
6.883  
6.868

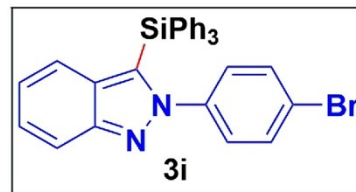

<sup>1</sup>H NMR: 400 MHz  
Solvent: CDCl<sub>3</sub>

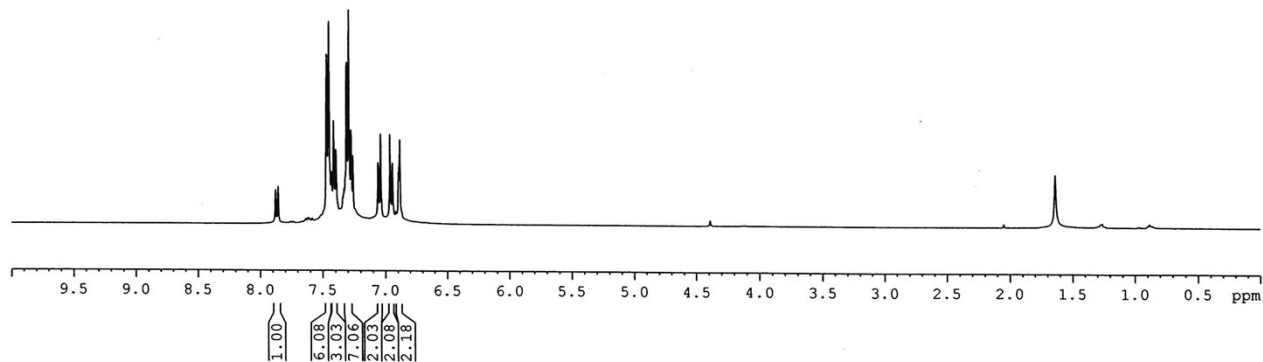

Current Data Parameters  
NAME Dr. A HAJRA 2023 1H  
EXPNO 343  
PROCNO 1

F2 - Acquisition Parameters  
Date\_ 20230321  
Time 13.26  
INSTRUM spect  
PROBHD 5 mm PABBO BB/  
PULPROG zg30  
TD 32768  
SOLVENT CDCl3  
NS 8  
DS 2  
SWH 8223.685 Hz  
FIDRES 0.250967 Hz  
AQ 1.9922944 sec  
RG 135.7  
DW 60.800 usec  
DE 6.50 usec  
TE 293.5 K  
D1 1.00000000 sec  
TD0 1

===== CHANNEL f1 =====  
SF01 400.1524711 MHz  
NUC1 1H  
P1 14.75 usec  
PLW1 12.00000000 W

F2 - Processing parameters  
SI 16384  
SF 400.1500097 MHz  
WDW EM  
SSB 0  
LB 0.30 Hz  
GB 0  
PC 1.00

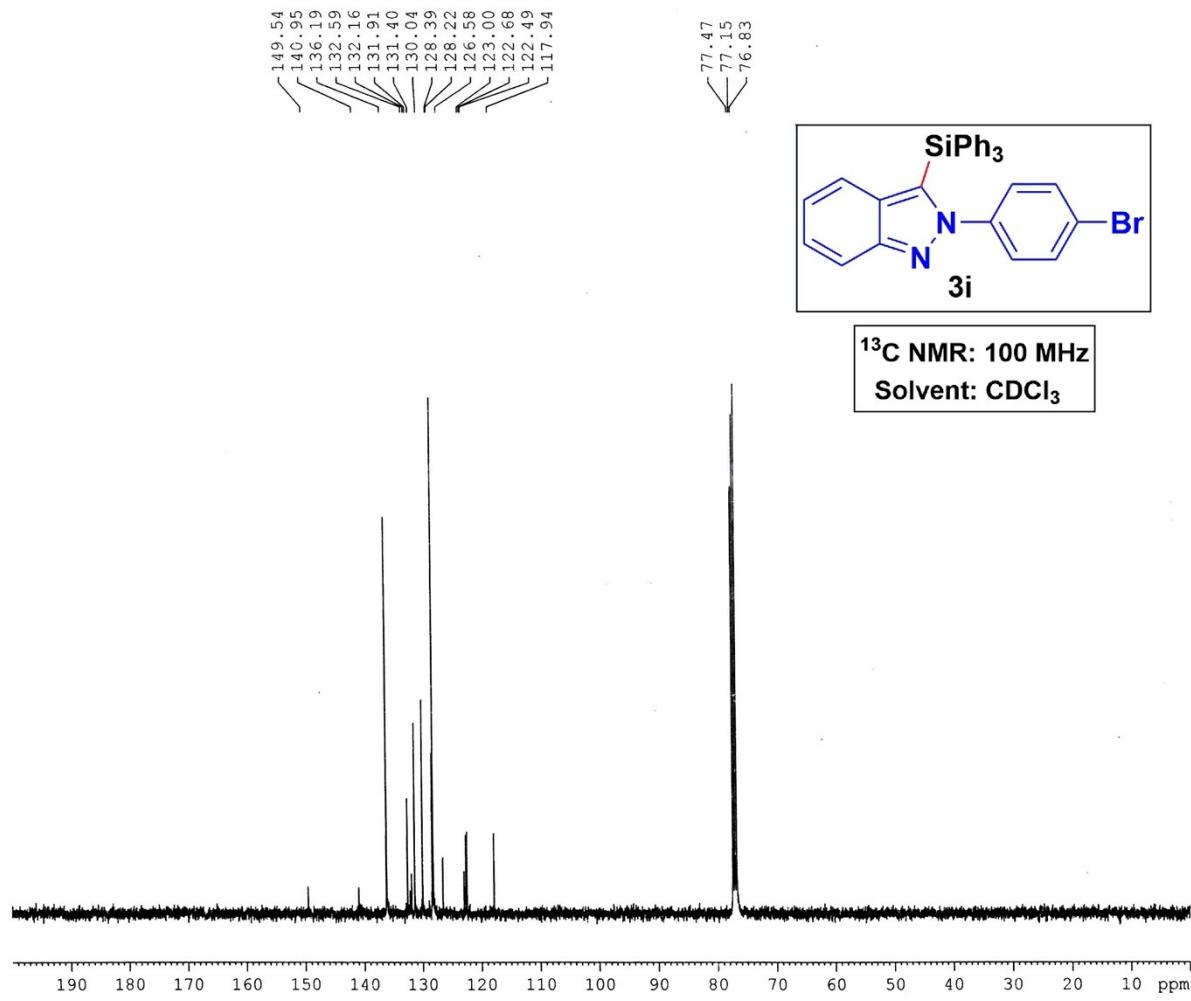

Current Data Parameters  
 NAME Dr. A HAJRA-2023-13C  
 EXPNO 92  
 PROCNO 1

F2 - Acquisition Parameters  
 Date\_ 20230321  
 Time\_ 13.45  
 INSTRUM spect  
 PROBHD 5 mm PABBO BB/  
 PULPROG zgpg30  
 TD 32768  
 SOLVENT CDCl<sub>3</sub>  
 NS 300  
 DS 2  
 SWH 24038.461 Hz  
 FIDRES 0.733596 Hz  
 AQ 0.6815744 sec  
 RG 186.42  
 DW 20.800 usec  
 DE 6.50 usec  
 TE 294.4 K  
 D1 2.0000000 sec  
 D11 0.0300000 sec  
 TD0 1

===== CHANNEL f1 =====  
 SFO1 100.6278588 MHz  
 NUC1 13C  
 P1 8.90 usec  
 PLW1 54.0000000 W

===== CHANNEL f2 =====  
 SFO2 400.1516006 MHz  
 NUC2 1H  
 CPDPRG[2] waltz16  
 FCPD2 90.00 usec  
 PLW2 12.0000000 W  
 PLW12 0.32231000 W  
 PLW13 0.16212000 W

F2 - Processing parameters  
 SI 16384  
 SF 100.6177873 MHz  
 WDW EM  
 SSB 0  
 LB 1.00 Hz  
 GB 0  
 PC 1.40



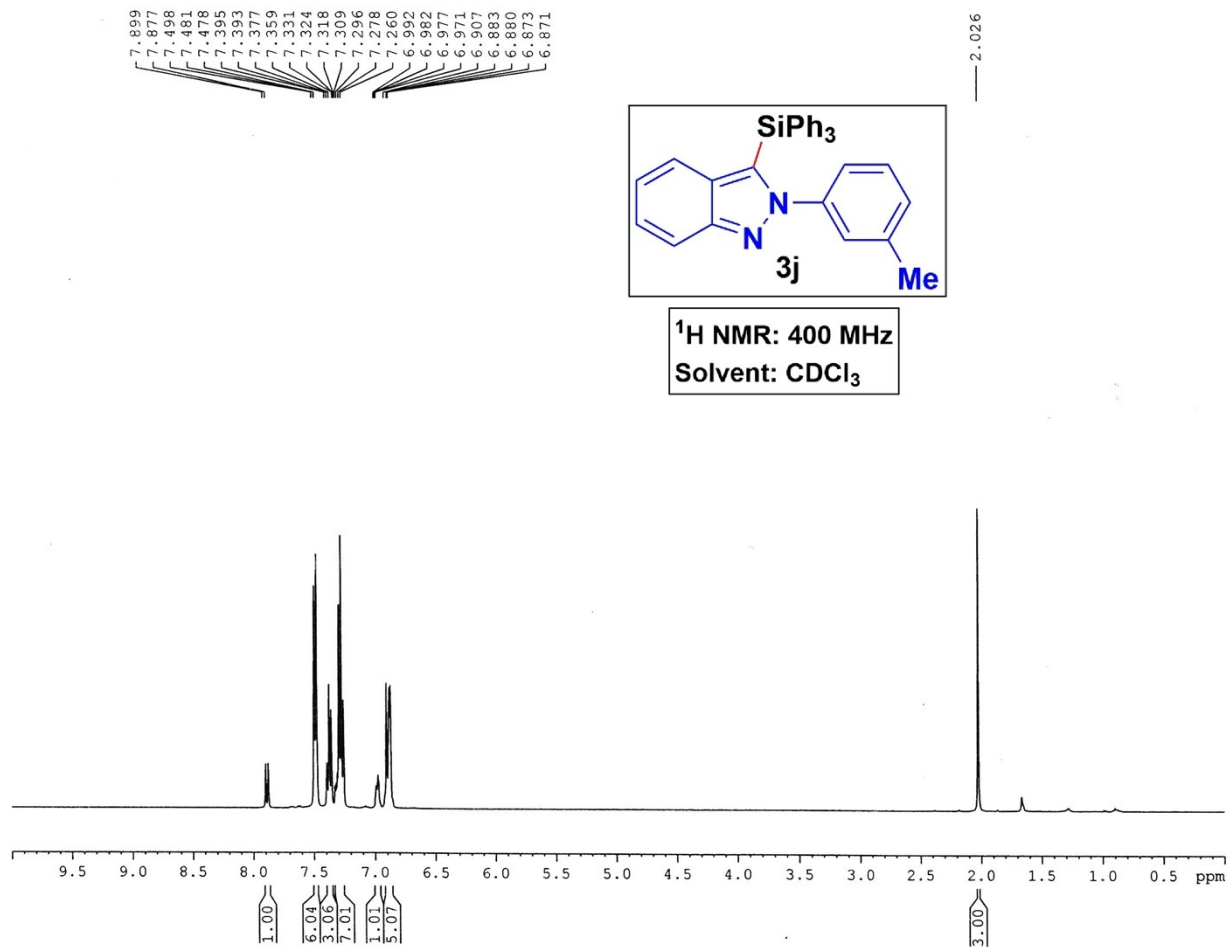

Current Data Parameters  
NAME Dr. A HAJRA 2023 1H  
EXPNO 304  
PROCNO 1

F2 - Acquisition Parameters  
Date\_ 20230308  
Time\_ 17.35  
INSTRUM spect  
PROBHD 5 mm PABBO BB/  
PULPROG zg30  
TD 32768  
SOLVENT CDCl3  
NS 8  
DS 2  
SWH 8223.685 Hz  
FIDRES 0.250967 Hz  
AQ 1.9922944 sec  
RG 62.69  
DW 60.800 usec  
DE 6.50 usec  
TE 296.8 K  
D1 1.00000000 sec  
TD0 1

===== CHANNEL f1 =====  
SFO1 400.1524711 MHz  
NUC1 1H  
P1 14.75 usec  
PLW1 12.00000000 W

F2 - Processing parameters  
SI 16384  
SF 400.1500117 MHz  
WDW EM  
SSB 0  
LB 0.30 Hz  
GB 0  
FC 1.00

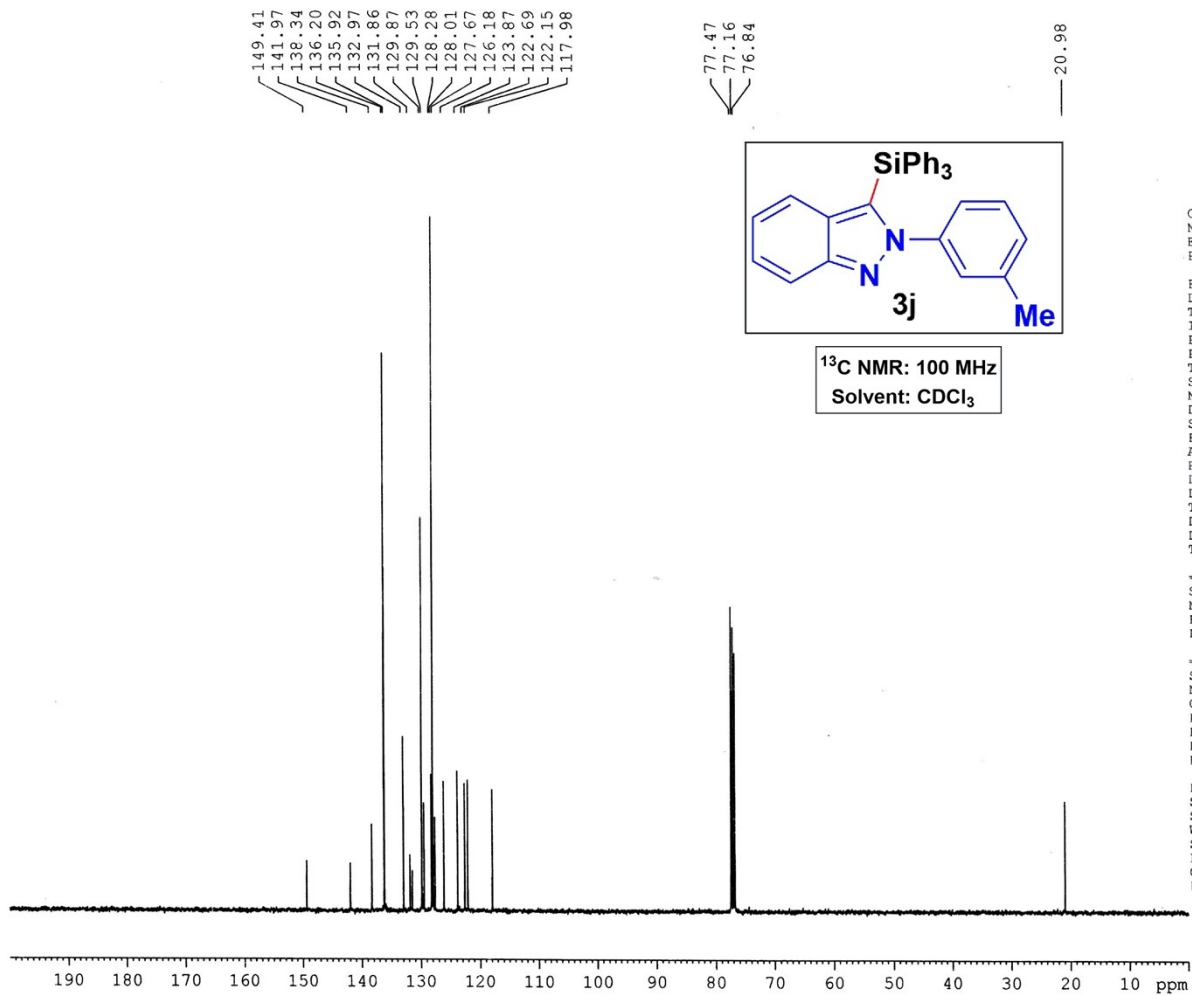

Current Data Parameters  
NAME Dr. A HAJRA-2023-13C  
EXPNO 77  
PROCNO 1

F2 - Acquisition Parameters  
Date\_ 20230308  
Time 18.00  
INSTRUM spect  
PROBHD 5 mm PABBO BB/  
PULPROG zgpg30  
TD 32768  
SOLVENT CDCl3  
NS 440  
DS 2  
SWH 24038.461 Hz  
FIDRES 0.733596 Hz  
AQ 0.6815744 sec  
RG 186.42  
DW 20.800 usec  
DE 6.50 usec  
TE 297.3 K  
D1 2.00000000 sec  
D11 0.03000000 sec  
TD0 1

----- CHANNEL f1 -----  
SFO1 100.6278588 MHz  
NUC1 13C  
P1 8.90 usec  
PLW1 54.00000000 W

----- CHANNEL f2 -----  
SFO2 400.1516006 MHz  
NUC2 1H  
CPDPRG2 waltz16  
PCPD2 90.00 usec  
PLW2 12.00000000 W  
PLW12 0.32231000 W  
PLW13 0.16212000 W

F2 - Processing parameters  
SI 16384  
SF 100.6177887 MHz  
WDW EM  
SSB 0  
LB 1.00 Hz  
GB 0  
PC 1.40

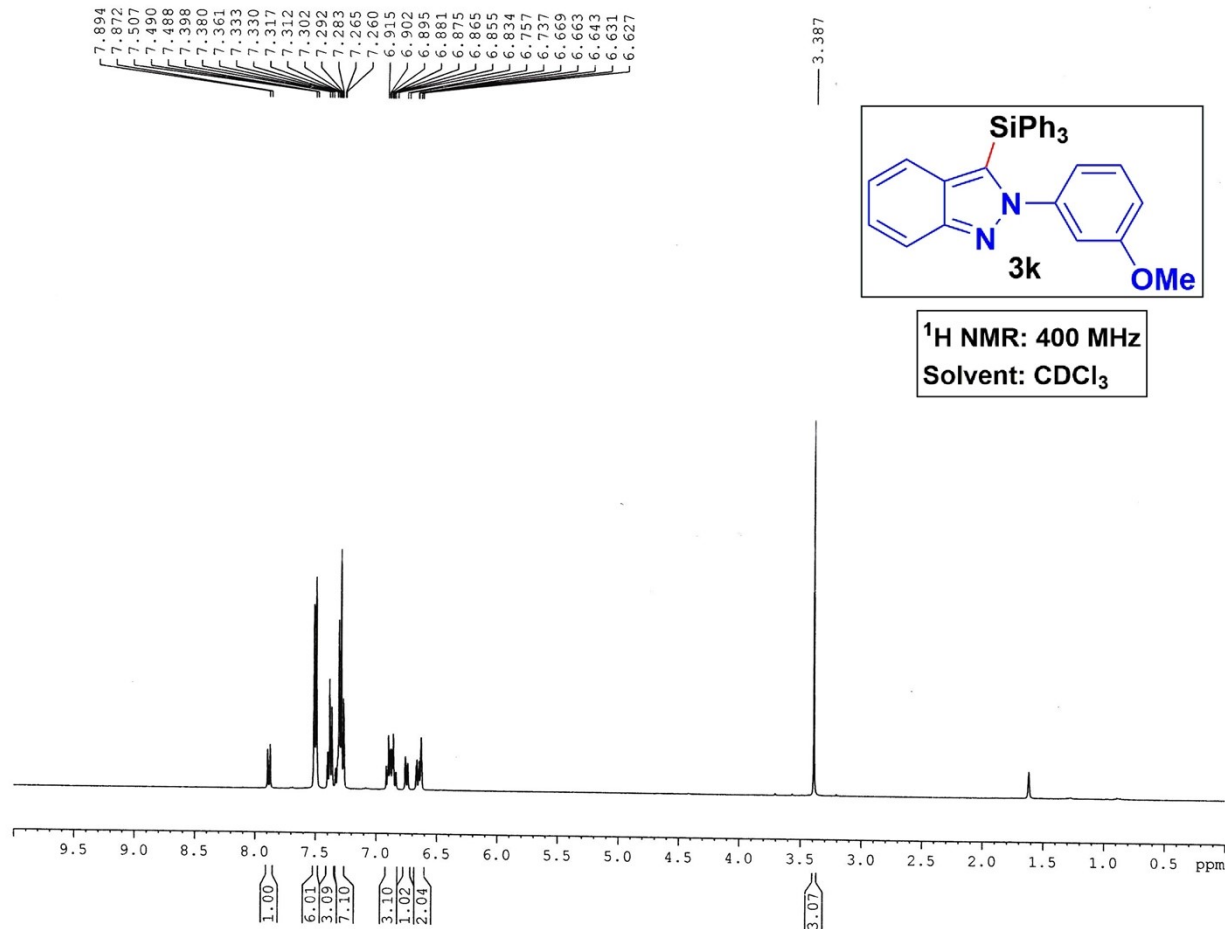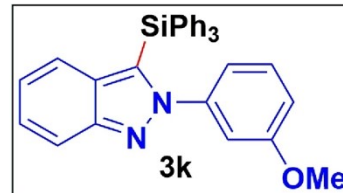

<sup>1</sup>H NMR: 400 MHz  
Solvent: CDCl<sub>3</sub>

Current Data Parameters  
NAME Dr. A HAJRA 2023 1H  
EXPNO 220  
PROCNO 1

F2 - Acquisition Parameters  
Date\_ 20230304  
Time\_ 16.38  
INSTRUM spect  
PROBHD 5 mm PABBO BB/  
PULPROG zg30  
TD 32768  
SOLVENT CDCl3  
NS 8  
DS 2  
SWH 8223.685 Hz  
FIDRES 0.250967 Hz  
AQ 1.9922944 sec  
RG 87.66  
DW 60.800 usec  
DE 6.50 usec  
TE 295.5 K  
D1 1.00000000 sec  
TD0 1

===== CHANNEL f1 =====  
SFO1 400.1524711 MHz  
NUC1 1H  
P1 14.75 usec  
PLW1 12.00000000 W

F2 - Processing parameters  
SI 16384  
SF 400.1500097 MHz  
WDW EM  
SSB 0  
LB 0.30 Hz  
GB 0  
PC 1.00

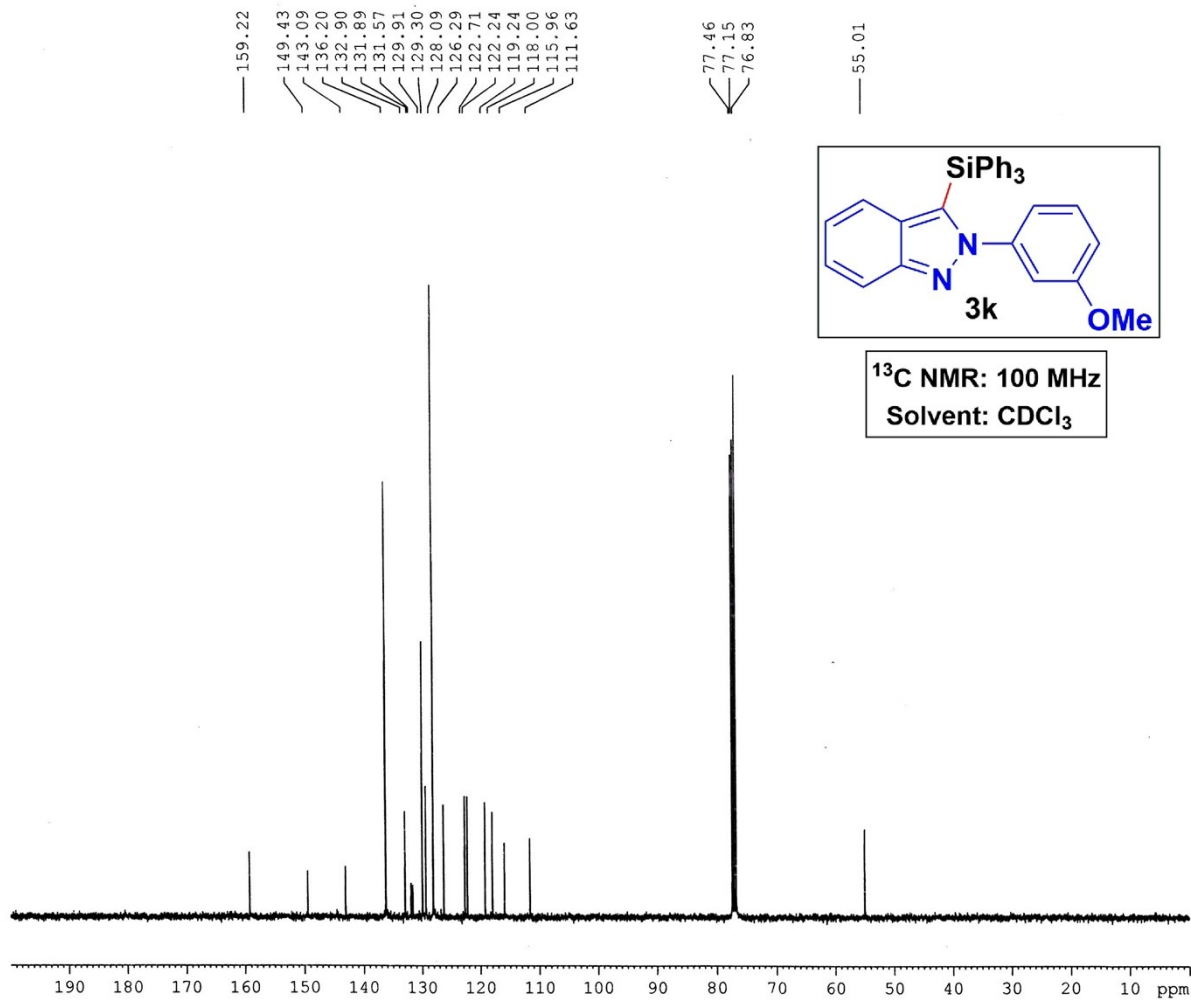

Current Data Parameters  
 NAME Dr. A HAJRA-2023-13C  
 EXPNO 73  
 PROCNO 1

F2 - Acquisition Parameters  
 Date\_ 20230304  
 Time 17.03  
 INSTRUM spect  
 PROBHD 5 mm PABBO BB/  
 PULPROG zgpg30  
 TD 32768  
 SOLVENT CDCl3  
 NS 490  
 DS 2  
 SWH 24038.461 Hz  
 FIDRES 0.733596 Hz  
 AQ 0.6815744 sec  
 RG 186.42  
 DW 20.800 usec  
 DE 6.50 usec  
 TE 296.0 K  
 D1 2.0000000 sec  
 D11 0.03000000 sec  
 TDO 1

===== CHANNEL f1 =====  
 SFO1 100.6278588 MHz  
 NUC1 13C  
 P1 8.90 usec  
 PLW1 54.00000000 W

===== CHANNEL f2 =====  
 SFO2 400.1516006 MHz  
 NUC2 1H  
 CPDPRG[2] waltz16  
 PCPD2 90.00 usec  
 PLW2 12.00000000 W  
 PLW12 0.32231000 W  
 PLW13 0.16212000 W

F2 - Processing parameters  
 SI 16384  
 SF 100.6177872 MHz  
 WDW EM  
 SSB 0  
 LB 1.00 Hz  
 GB 0  
 FC 1.40

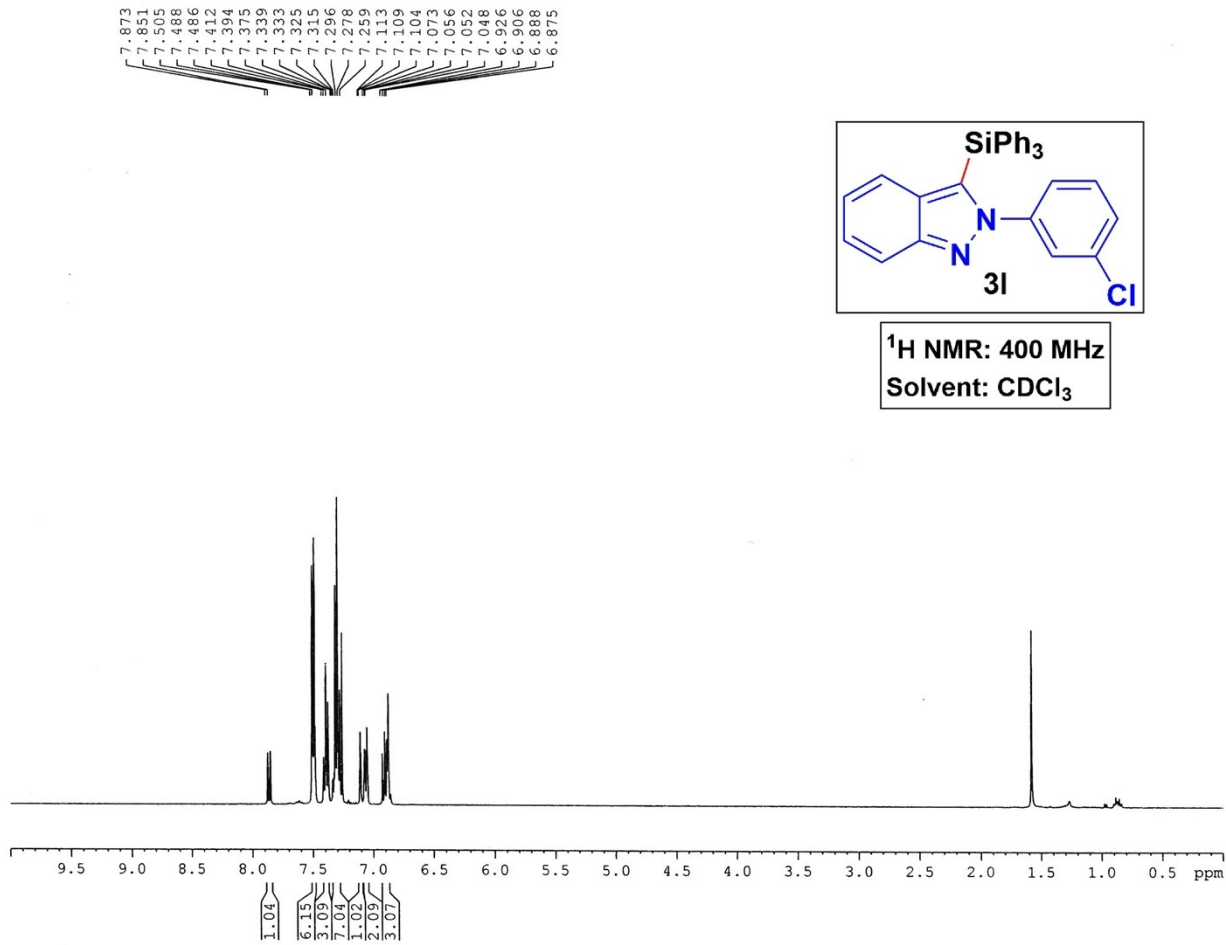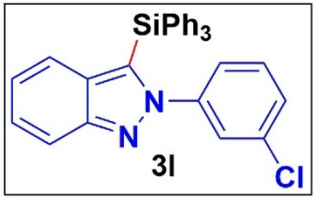

<sup>1</sup>H NMR: 400 MHz  
Solvent: CDCl<sub>3</sub>

Current Data Parameters  
NAME Dr. A HAJRA 2023 1H  
EXPNO 388  
PROCNO 1

F2 - Acquisition Parameters  
Date\_ 20230329  
Time\_ 9.32  
INSTRUM spect  
PROBHD 5 mm PABBO BB/  
PULPROG zg30  
TD 32768  
SOLVENT CDCl3  
NS 8  
DS 2  
SWH 8223.685 Hz  
FIDRES 0.250967 Hz  
AQ 1.9922944 sec  
RG 168.31  
DW 60.800 usec  
DE 6.50 usec  
TE 296.3 K  
D1 1.00000000 sec  
TD0 1

===== CHANNEL f1 =====  
SF01 400.1524711 MHz  
NUC1 1H  
P1 14.75 usec  
PLW1 12.00000000 W

F2 - Processing parameters  
SI 16384  
SF 400.1500096 MHz  
WDW EM  
SSB 0  
LB 0.30 Hz  
GB 0  
PC 1.00

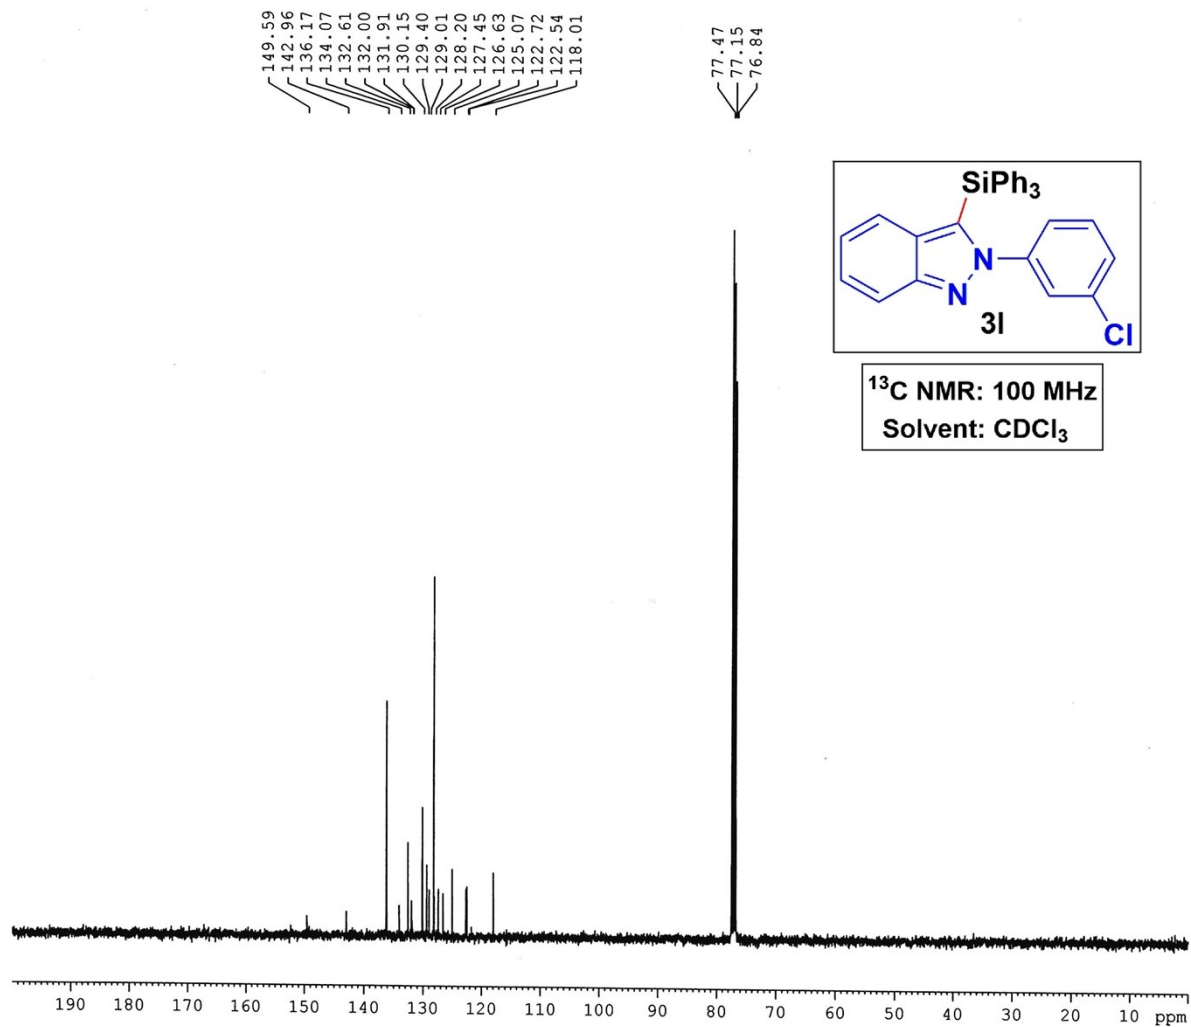

Current Data Parameters  
 NAME Dr. A HAJRA-2023-13C  
 EXPNO 108  
 PROCNO 1

F2 - Acquisition Parameters  
 Date\_ 20230329  
 Time 9.58  
 INSTRUM spect  
 PROBHD 5 mm PABBO BB/  
 PULPROG zgpg30  
 TD 32768  
 SOLVENT CDC13  
 NS 420  
 DS 2  
 SWH 24038.461 Hz  
 FIDRES 0.733596 Hz  
 AQ 0.6815744 sec  
 RG 186.42  
 DW 20.800 usec  
 DE 6.50 usec  
 TE 296.9 K  
 D1 2.00000000 sec  
 D11 0.03000000 sec  
 TDO 1

----- CHANNEL f1 -----  
 SFO1 100.6278588 MHz  
 NUC1 13C  
 P1 8.90 usec  
 PLW1 54.00000000 W

----- CHANNEL f2 -----  
 SFO2 400.1516006 MHz  
 NUC2 1H  
 CPDPRG2 waltz16  
 PCPD2 90.00 usec  
 PLW2 12.00000000 W  
 PLW12 0.32231000 W  
 PLW13 0.16212000 W

F2 - Processing parameters  
 SI 16384  
 SF 100.6177844 MHz  
 WDW EM  
 SSB 0  
 LB 1.00 Hz  
 GB 0  
 PC 1.40

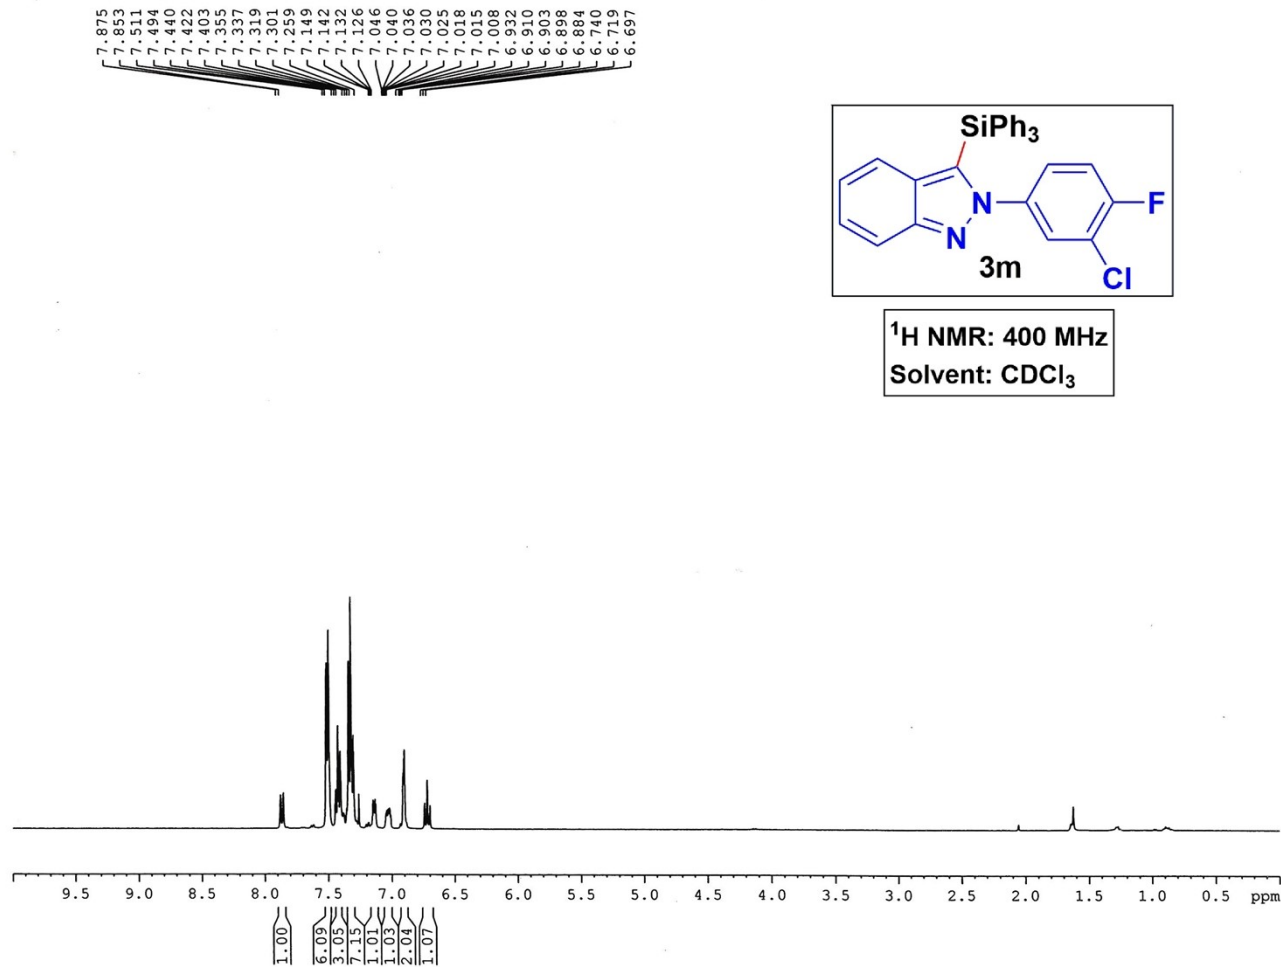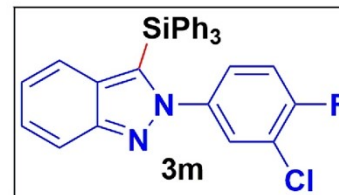

<sup>1</sup>H NMR: 400 MHz  
Solvent: CDCl<sub>3</sub>

Current Data Parameters  
NAME Dr. A HAJRA 2023 1H  
EXPNO 316  
PROCNO 1

F2 - Acquisition Parameters  
Date\_ 20230312  
Time\_ 16.13  
INSTRUM spect  
PROBHD 5 mm PABBO BB/  
PULPROG zg30  
TD 32768  
SOLVENT CDCl3  
NS 8  
DS 2  
SWH 8223.685 Hz  
FIDRES 0.250967 Hz  
AQ 1.9922944 sec  
RG 77.59  
DW 60.800 usec  
DE 6.50 usec  
TE 295.8 K  
D1 1.00000000 sec  
TD0 1

===== CHANNEL f1 =====  
SFO1 400.1524711 MHz  
NUC1 1H  
P1 14.75 usec  
PLW1 12.00000000 W

F2 - Processing parameters  
SI 16384  
SF 400.1500098 MHz  
WDW EM  
SSB 0  
LB 0.30 Hz  
GB 0  
PC 1.00

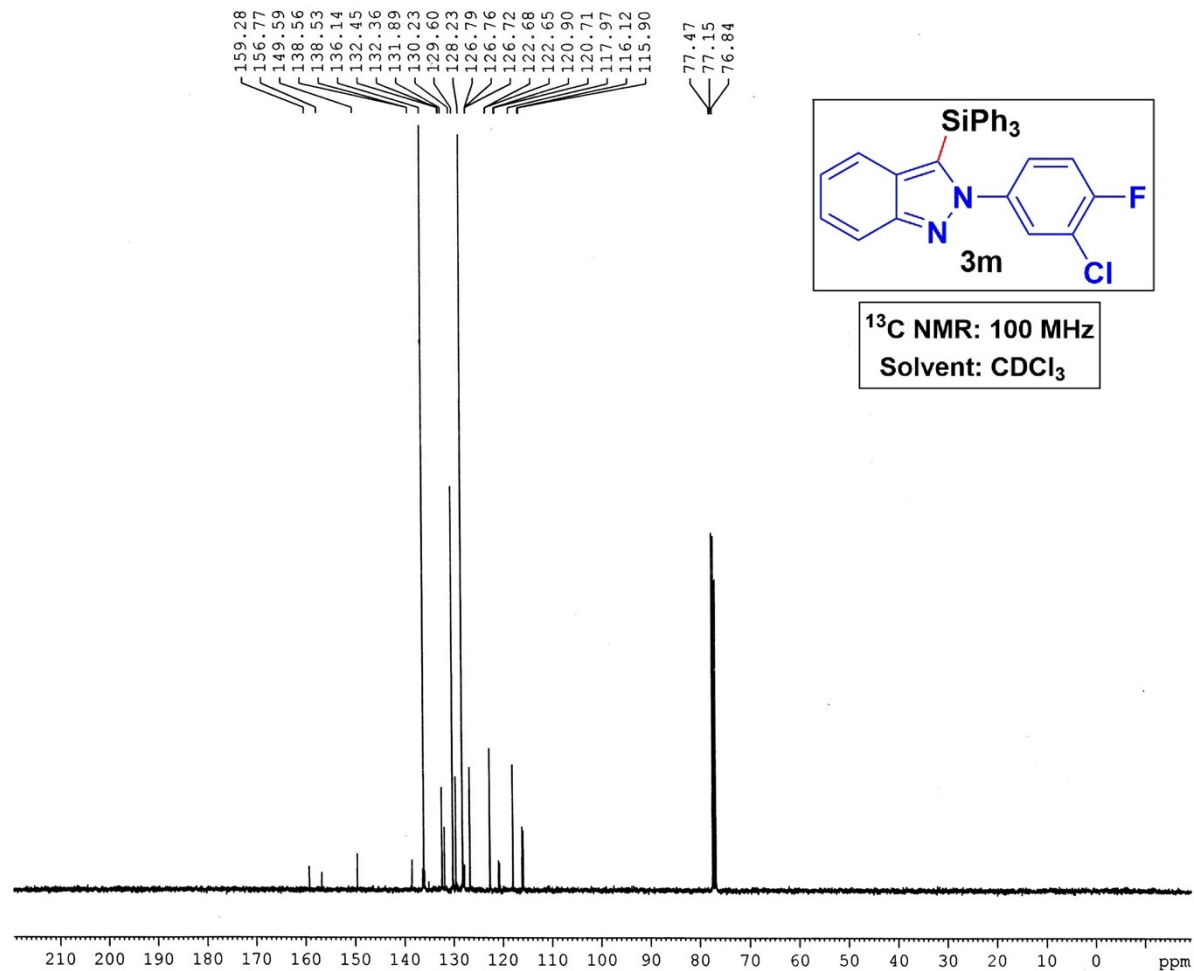

Current Data Parameters  
NAME Dr. A HAJRA-2023-13C  
EXPNO 80  
PROCNO 1

F2 - Acquisition Parameters  
Date\_ 20230313  
Time 10.44  
INSTRUM spect  
PROBHD 5 mm PABBO BB/  
PULPROG zgpg30  
TD 32768  
SOLVENT CDCl<sub>3</sub>  
NS 380  
DS 2  
SWH 24038.461 Hz  
FIDRES 0.733596 Hz  
AQ 0.6815744 sec  
RG 186.42  
DW 20.800 usec  
DE 6.50 usec  
TE 297.6 K  
D1 2.0000000 sec  
D11 0.0300000 sec  
TD0 1

===== CHANNEL f1 =====  
SFO1 100.6278588 MHz  
NUC1 13C  
P1 8.90 usec  
PLW1 54.0000000 W

===== CHANNEL f2 =====  
SFO2 400.1516006 MHz  
NUC2 1H  
CPDPRG[2] waltz16  
PCPD2 90.00 usec  
PLW2 12.0000000 W  
PLW12 0.32231000 W  
PLW13 0.16212000 W

F2 - Processing parameters  
SI 16384  
SF 100.6177873 MHz  
WDB EM  
SSB 0  
LB 1.00 Hz  
GB 0  
PC 1.40



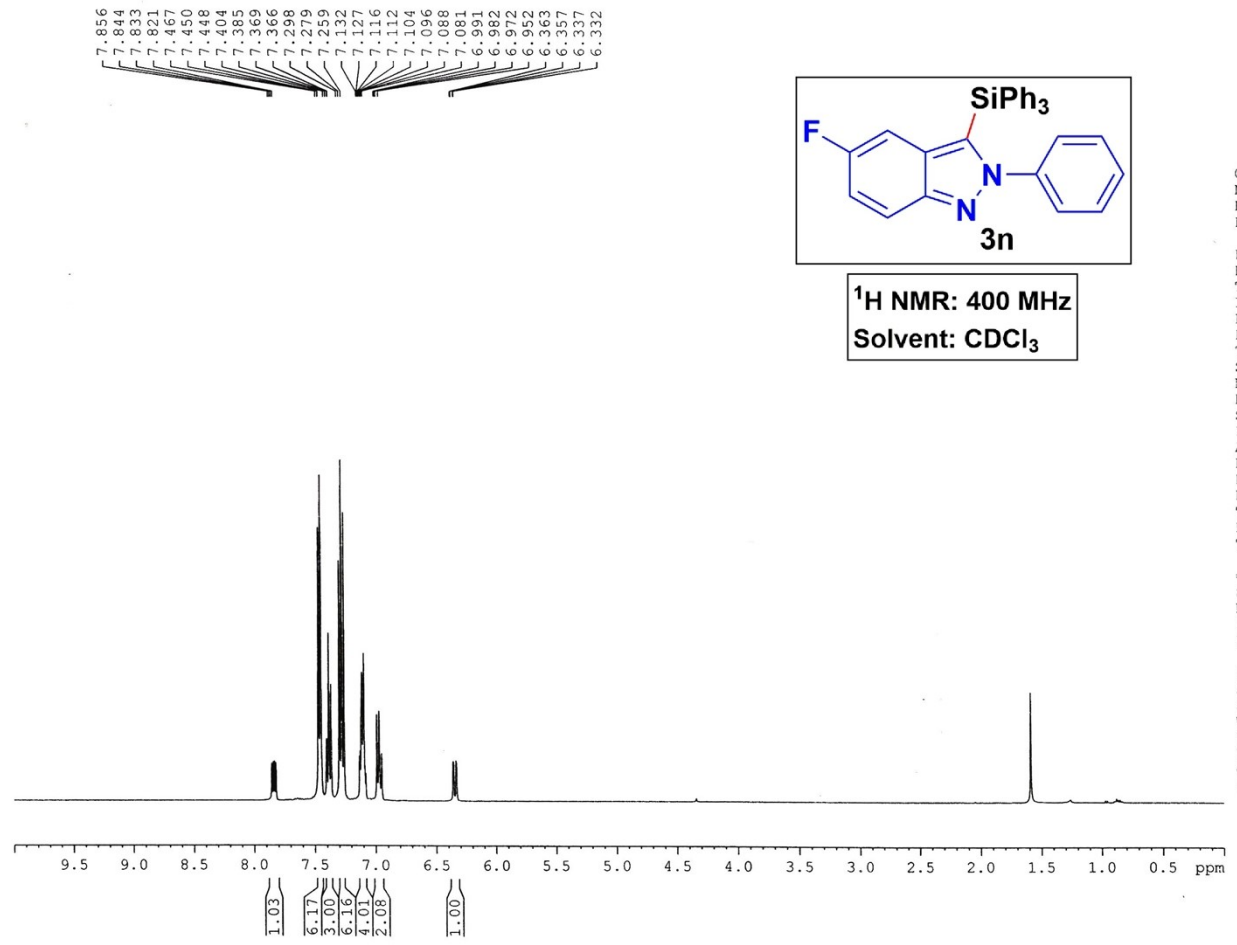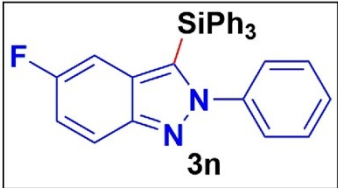

<sup>1</sup>H NMR: 400 MHz  
Solvent: CDCl<sub>3</sub>

Current Data Parameters  
NAME Dr. A HAJRA 2023 1H  
EXPNO 151  
PROCNO 1

F2 - Acquisition Parameters  
Date\_ 20230214  
Time 19.24  
INSTRUM spect  
PROBHD 5 mm PABBO BB/  
PULPROG zg30  
TD 32768  
SOLVENT CDCl3  
NS 8  
DS 2  
SWH 8223.685 Hz  
FIDRES 0.250967 Hz  
AQ 1.9922944 sec  
RG 148.91  
DW 60.800 usec  
DE 6.50 usec  
TE 291.8 K  
D1 1.00000000 sec  
TDO 1

===== CHANNEL f1 =====  
SFO1 400.1524711 MHz  
NUC1 1H  
P1 14.75 usec  
PLW1 12.00000000 W

F2 - Processing parameters  
SI 16384  
SF 400.1500097 MHz  
WDW EM  
SSB 0  
LB 0.30 Hz  
GB 0  
PC 1.00

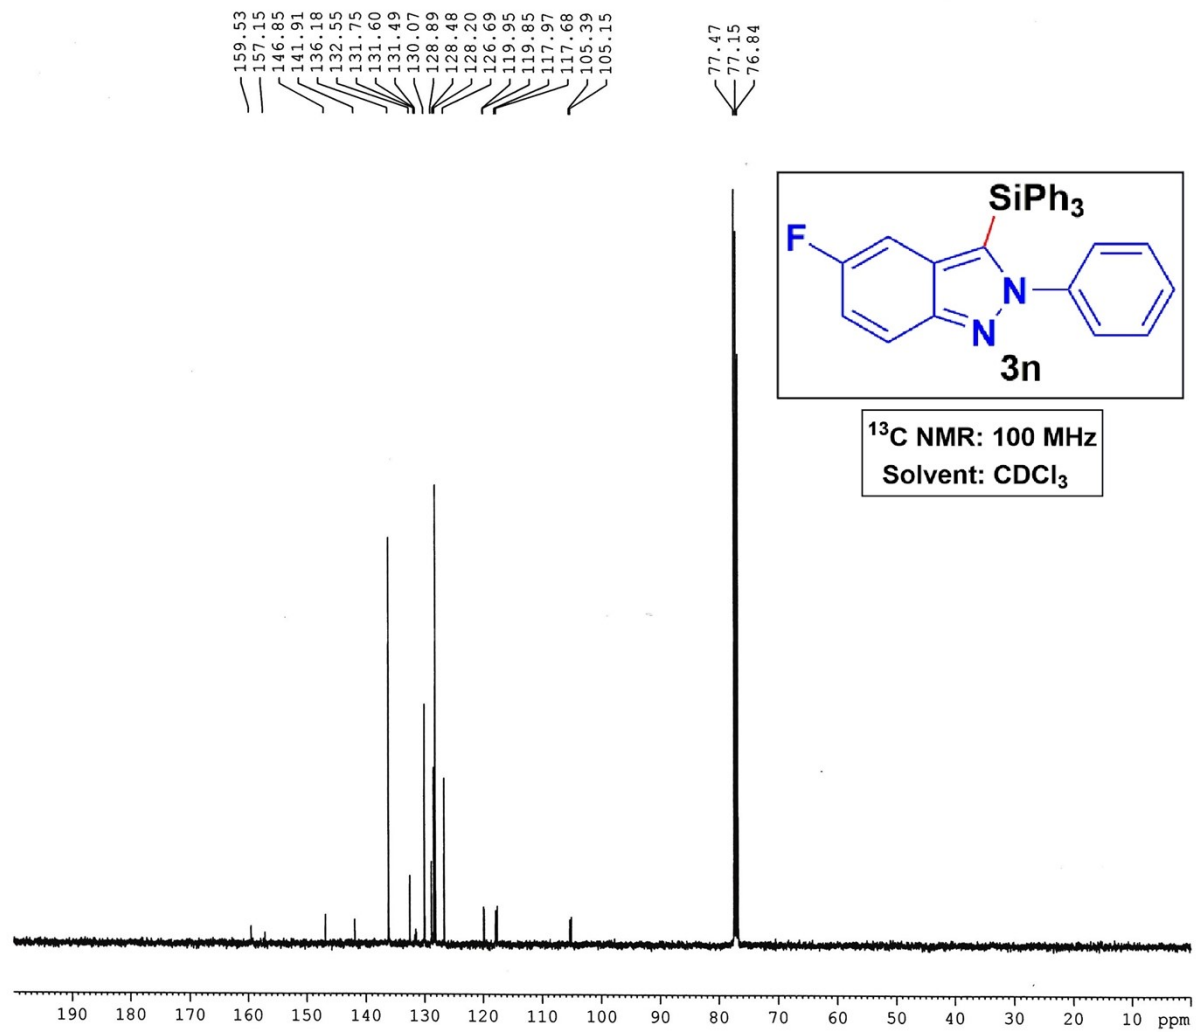

159.53  
157.15  
146.85  
141.91  
136.18  
132.55  
131.75  
131.60  
131.49  
130.07  
128.89  
128.48  
128.20  
126.69  
119.95  
119.85  
117.97  
117.68  
105.39  
105.15

77.47  
77.15  
76.84

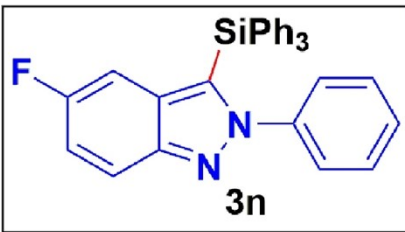

**<sup>13</sup>C NMR: 100 MHz**  
**Solvent: CDCl<sub>3</sub>**

```

Current Data Parameters
NAME      Dr. A HAJRA-2023-13C
EXPNO     49
PROCNO    1

F2 - Acquisition Parameters
Date_     20230215
Time      10.53
INSTRUM   spect
PROBHD    5 mm PABBO BB/
PULPROG   zgpg30
TD         32768
SOLVENT   CDCl3
NS         950
DS         2
SWH        24038.461 Hz
FIDRES     0.733596 Hz
AQ         0.6815744 sec
RG         186.42
DW         20.800 usec
DE         6.50 usec
TE         292.9 K
D1         2.00000000 sec
D11        0.03000000 sec
TDO        1

----- CHANNEL f1 -----
SFO1      100.6278588 MHz
NUC1       13C
P1         8.90 usec
PLW1       54.00000000 W

----- CHANNEL f2 -----
SFO2      400.1516006 MHz
NUC2       1H
CPDPRG[2]  waltz16
PCPD2      90.00 usec
PLW2       12.00000000 W
PLW12      0.32231000 W
PLW13      0.16212000 W

F2 - Processing parameters
SI         16384
SF         100.6177858 MHz
WDW        EM
SSB        0
LB         1.00 Hz
GB         0
PC         1.40

```

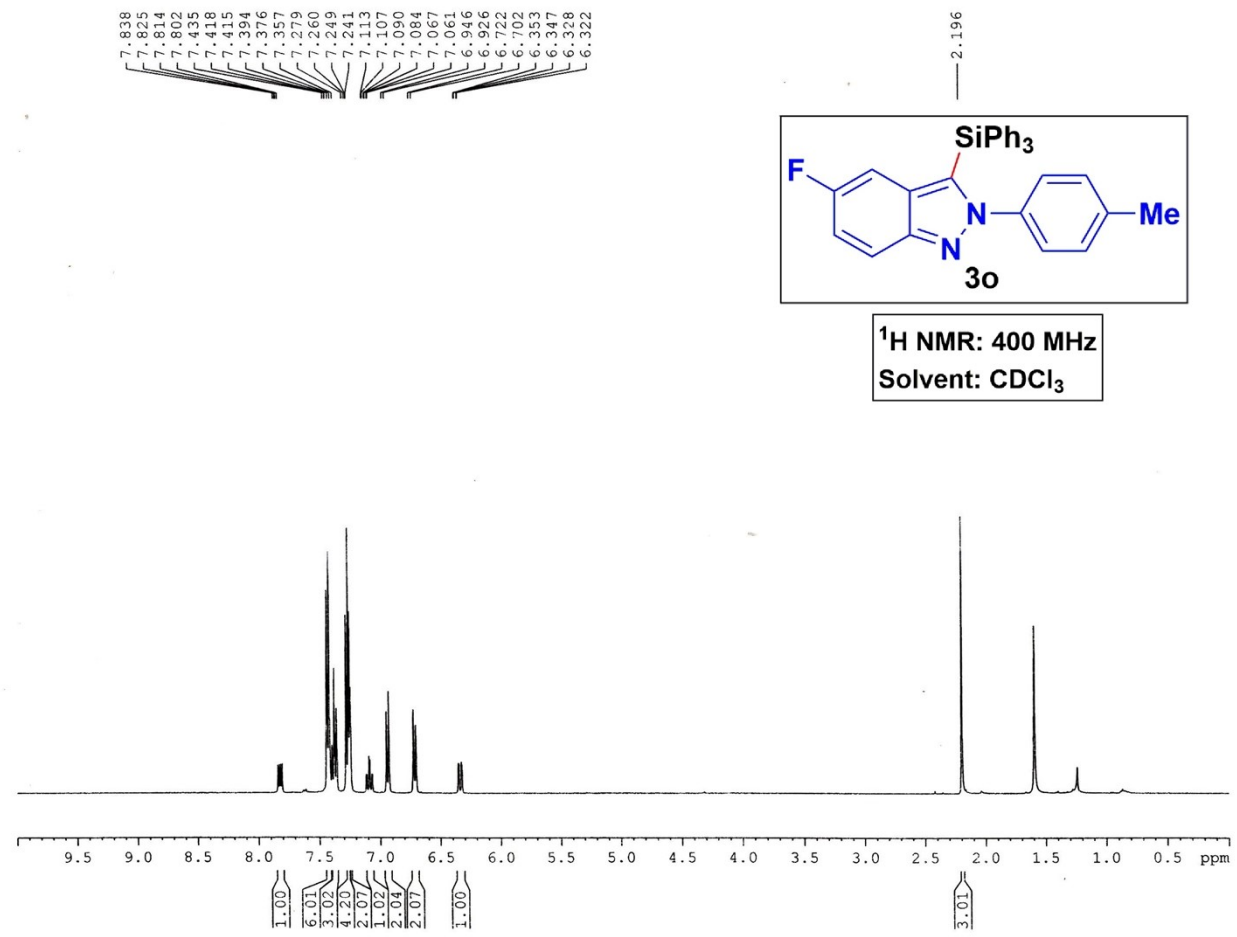

Current Data Parameters  
 NAME Dr. A HAJRA 2023 1H  
 EXPNO 4  
 PROCNO 1

F2 - Acquisition Parameters  
 Date\_ 20230105  
 Time 17.00  
 INSTRUM spect  
 PROBHD 5 mm PABBO BB/  
 PULPROG zg30  
 TD 32768  
 SOLVENT CDCl3  
 NS 8  
 DS 2  
 SWH 8223.685 Hz  
 FIDRES 0.250967 Hz  
 AQ 1.9922944 sec  
 RG 168.31  
 DW 60.800 usec  
 DE 6.50 usec  
 TE 290.1 K  
 D1 1.00000000 sec  
 TDO 1

===== CHANNEL f1 =====  
 SFO1 400.1524711 MHz  
 NUC1 1H  
 P1 14.75 usec  
 PLW1 12.00000000 W

F2 - Processing parameters  
 SI 16384  
 SF 400.1500137 MHz  
 WDW EM  
 SSB 0  
 LB 0.30 Hz  
 GB 0  
 PC 1.00

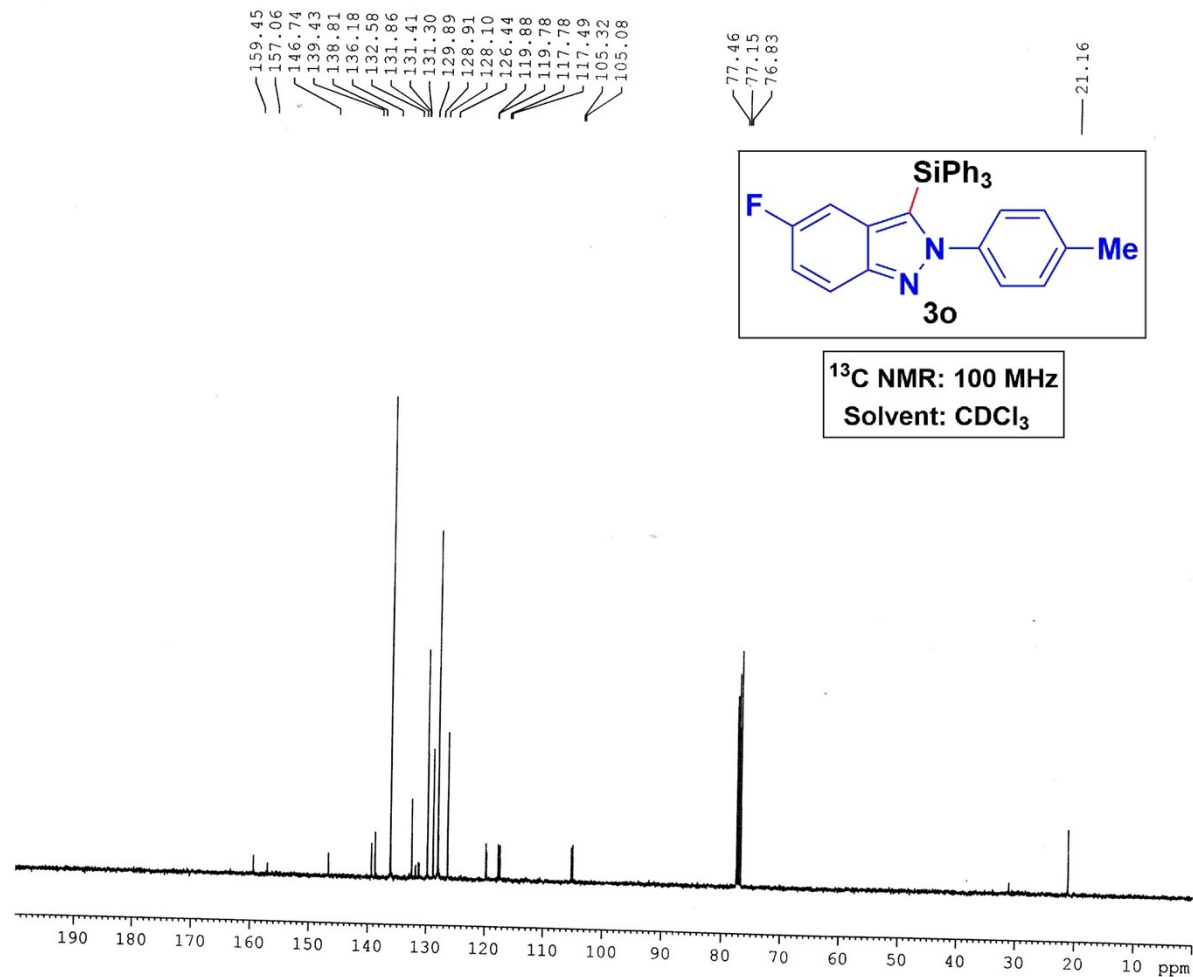

Current Data Parameters  
NAME Dr. A HAJRA-2023-13C  
EXPNO 14  
PROCNO 1

F2 - Acquisition Parameters  
Date\_ 20230115  
Time 16.11  
INSTRUM spect  
PROBHD 5 mm PABBO BB/  
PULPROG zgpg30  
TD 32768  
SOLVENT CDCl3  
NS 210  
DS 2  
SWH 24038.461 Hz  
FIDRES 0.733596 Hz  
AQ 0.6815744 sec  
RG 186.42  
DW 20.800 usec  
DE 6.50 usec  
TE 290.6 K  
D1 2.00000000 sec  
D11 0.03000000 sec  
TD0 1

===== CHANNEL f1 =====  
SFO1 100.6278588 MHz  
NUC1 13C  
P1 8.90 usec  
PLW1 54.00000000 W

===== CHANNEL f2 =====  
SFO2 400.1516006 MHz  
NUC2 1H  
CFDPRG[2] waltz16  
PCPD2 90.00 usec  
PLW2 12.00000000 W  
PLW12 0.32231000 W  
PLW13 0.16212000 W

F2 - Processing parameters  
SI 16384  
SF 100.6177902 MHz  
WDW EM  
SSB 0  
LB 1.00 Hz  
GB 0  
PC 1.40

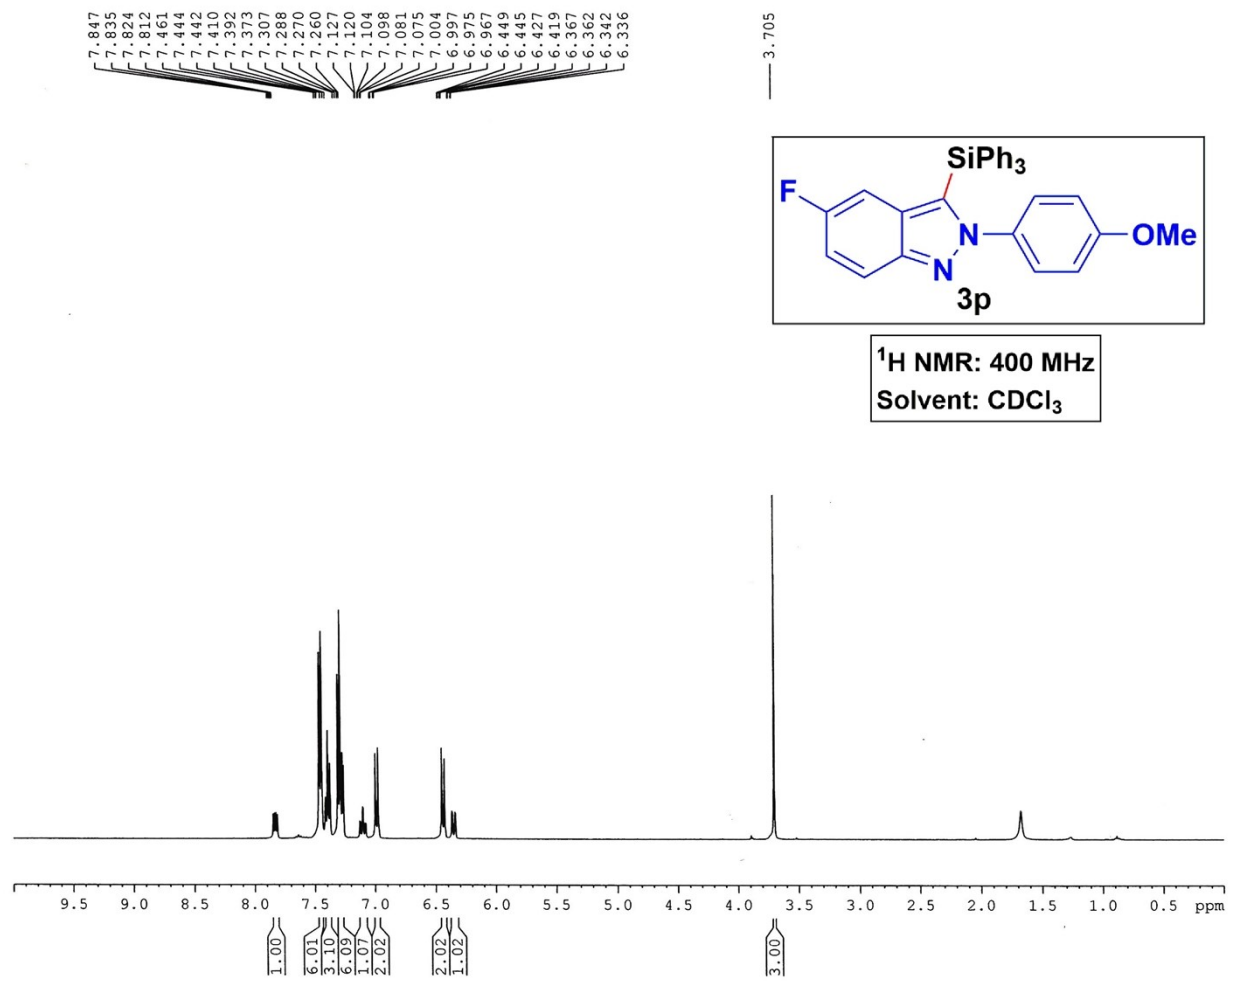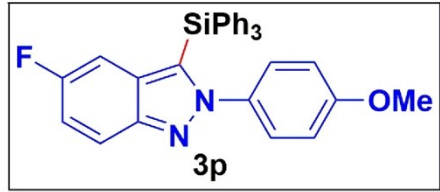

<sup>1</sup>H NMR: 400 MHz  
Solvent: CDCl<sub>3</sub>

Current Data Parameters  
 NAME Dr. A HAJRA 2023 1H  
 EXPNO 658  
 PROCNO 1

F2 - Acquisition Parameters  
 Date\_ 20230601  
 Time 12.17  
 INSTRUM spect  
 PROBHD 5 mm PABBO BB/  
 PULPROG zg30  
 TD 32768  
 SOLVENT CDCl3  
 NS 8  
 DS 2  
 SWH 8223.685 Hz  
 FIDRES 0.250967 Hz  
 AQ 1.9922944 sec  
 RG 135.7  
 DW 60.800 usec  
 DE 6.50 usec  
 TE 296.0 K  
 D1 1.00000000 sec  
 TD0 1

==== CHANNEL f1 =====  
 SFO1 400.1524711 MHz  
 NUC1 1H  
 P1 14.75 usec  
 PLW1 12.00000000 W

F2 - Processing parameters  
 SI 16384  
 SF 400.1500097 MHz  
 WDW EM  
 SSB 0  
 LB 0.30 Hz  
 GB 0  
 PC 1.00

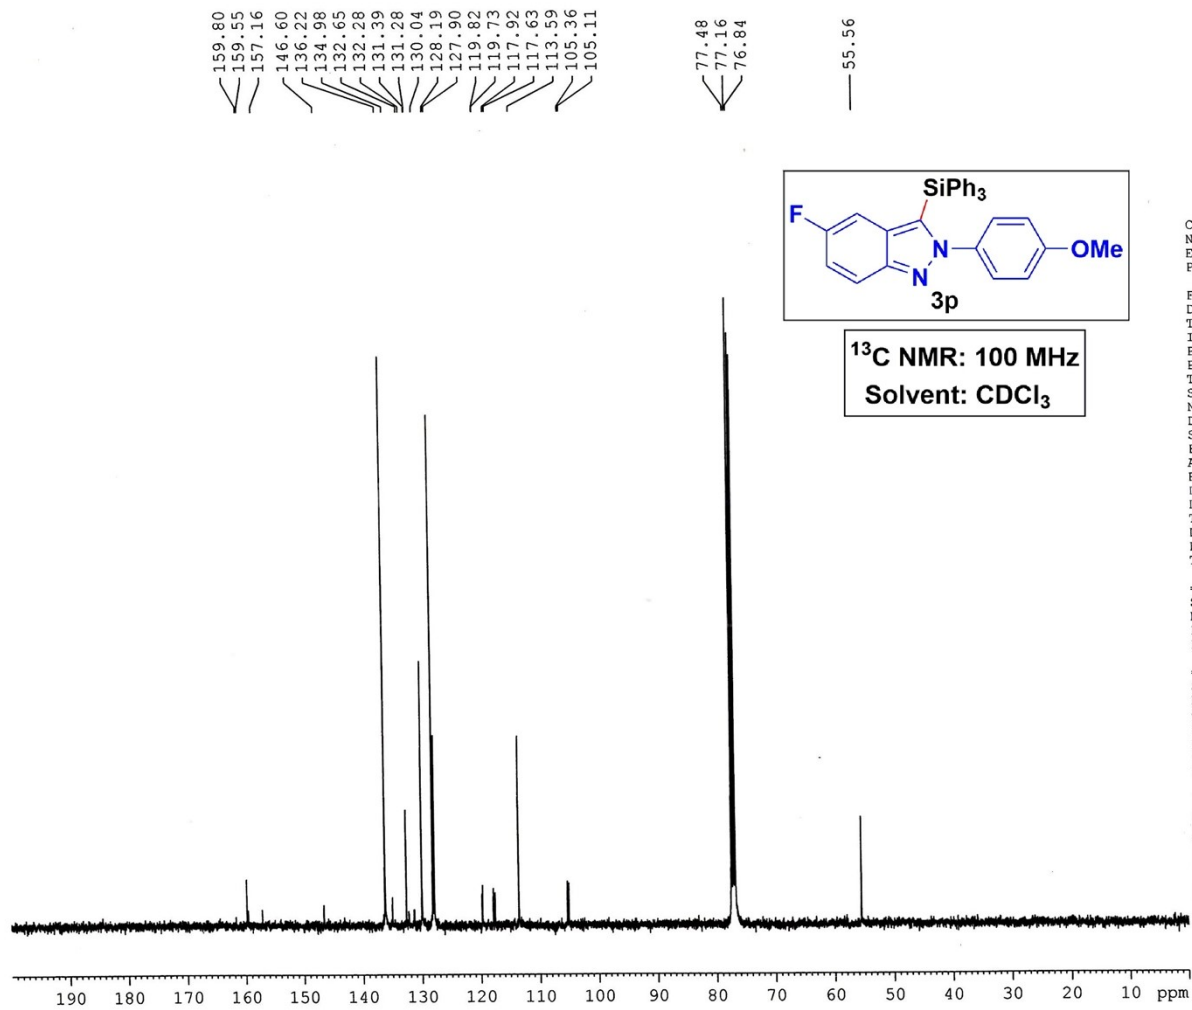

Current Data Parameters  
NAME Dr. A HAJRA-2023-13C  
EXPNO 211  
PROCNO 1

F2 - Acquisition Parameters  
Date\_ 20230602  
Time 17.29  
INSTRUM spect  
PROBHD 5 mm PABBO BB/  
PULPROG zgpg30  
TD 32768  
SOLVENT CDCl3  
NS 900  
DS 2  
SWH 24038.461 Hz  
FIDRES 0.733596 Hz  
AQ 0.6815744 sec  
RG 135.7  
DW 20.800 usec  
DE 6.50 usec  
TE 300.6 K  
D1 2.0000000 sec  
D11 0.0300000 sec  
TD0 1

----- CHANNEL f1 -----  
SFO1 100.6278588 MHz  
NUC1 13C  
P1 8.90 usec  
PLW1 54.00000000 W

----- CHANNEL f2 -----  
SFO2 400.1516006 MHz  
NUC2 1H  
CPDPRG2 waltz16  
PCPD2 90.00 usec  
PLW2 12.00000000 W  
PLW12 0.32231000 W  
PLW13 0.16212000 W

F2 - Processing parameters  
SI 16384  
SF 100.6177843 MHz  
WDW EM  
SSB 0  
LB 1.00 Hz  
GB 0  
PC 1.40

7.853  
7.841  
7.830  
7.818  
7.470  
7.451  
7.425  
7.406  
7.327  
7.308  
7.290  
7.259  
7.147  
7.142  
7.124  
7.120  
7.102  
7.097  
7.023  
7.005  
6.915  
6.894  
6.393  
6.368

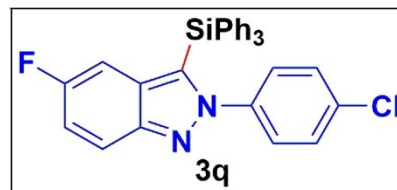

**<sup>1</sup>H NMR: 400 MHz**  
**Solvent: CDCl<sub>3</sub>**

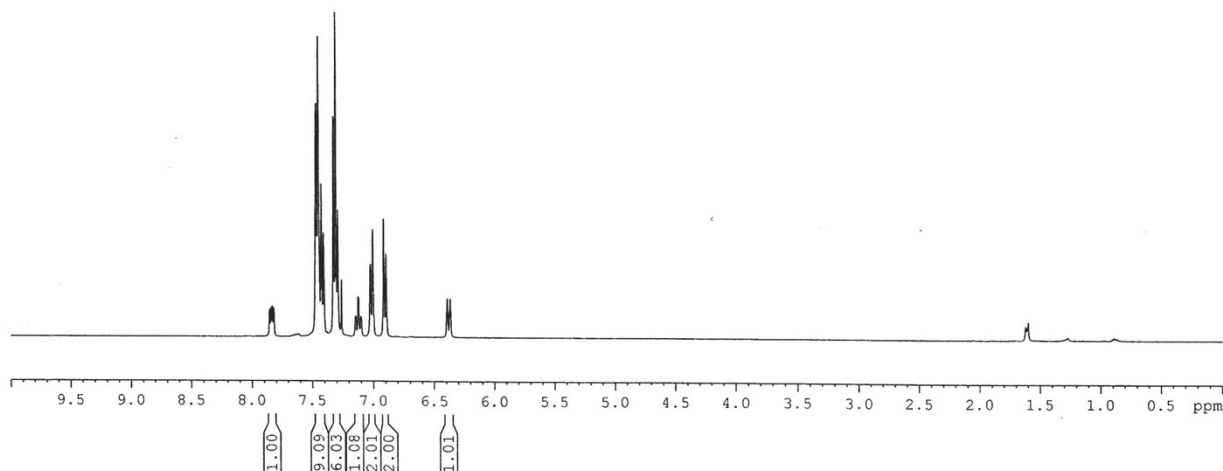

Current Data Parameters  
NAME Dr. A HAJRA 2023 1H  
EXPNO 202  
PROCNO 1

F2 - Acquisition Parameters  
Date\_ 20230227  
Time 17.17  
INSTRUM spect  
PROBHD 5 mm PABRO BB/  
PULPROG zg30  
TD 32768  
SOLVENT CDCl3  
NS 8  
DS 2  
SWH 8223.685 Hz  
FIDRES 0.250967 Hz  
AQ 1.9922944 sec  
RG 77.59  
DW 60.800 usec  
DE 6.50 usec  
TE 294.6 K  
D1 1.00000000 sec  
TDO 1

===== CHANNEL f1 =====  
SF01 400.1524711 MHz  
NUC1 1H  
P1 14.75 usec  
PLW1 12.00000000 W

F2 - Processing parameters  
SI 16384  
SF 400.1500097 MHz  
WDW EM  
SSB 0  
LB 0.30 Hz  
GB 0  
PC 1.00

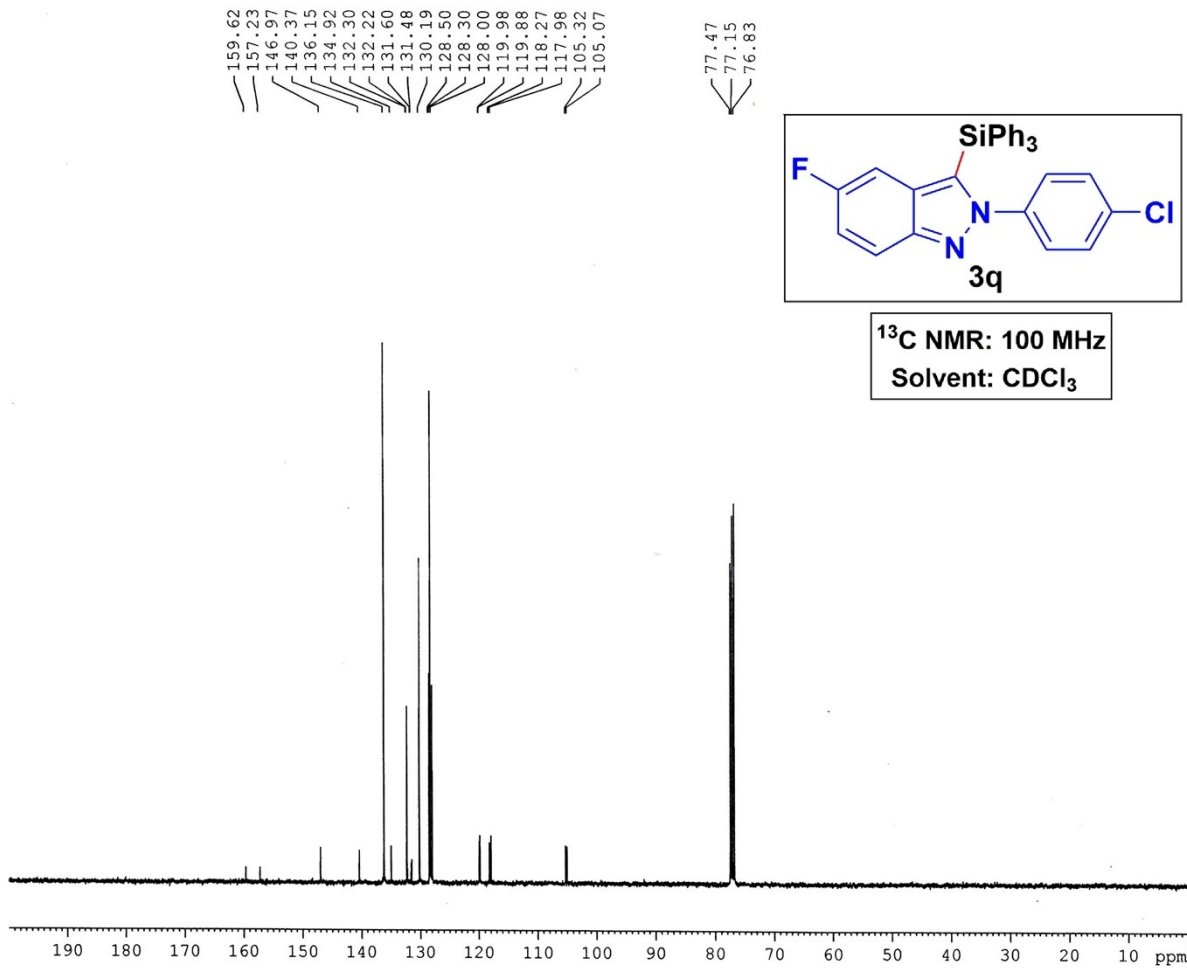

Current Data Parameters  
 NAME Dr. A HAJRA-2023-13C  
 EXPNO 68  
 PROCNO 1

F2 - Acquisition Parameters  
 Date\_ 20230227  
 Time 17.53  
 INSTRUM spect  
 PROBHD 5 mm PABBO BB/  
 PULPROG zgpg30  
 TD 32768  
 SOLVENT CDCl3  
 NS 720  
 DS 2  
 SWH 24038.461 Hz  
 FIDRES 0.733596 Hz  
 AQ 0.6815744 sec  
 RG 186.42  
 DW 20.800 usec  
 DE 6.50 usec  
 TE 294.8 K  
 D1 2.00000000 sec  
 D11 0.03000000 sec  
 TDO 1

----- CHANNEL f1 -----  
 SFO1 100.6278588 MHz  
 NUC1 13C  
 P1 8.90 usec  
 PLW1 54.00000000 W

----- CHANNEL f2 -----  
 SFO2 400.1516006 MHz  
 NUC2 1H  
 CPDPRG2 waltz16  
 FCPD2 90.00 usec  
 PLW2 12.00000000 W  
 PLW12 0.32231000 W  
 PLW13 0.16212000 W

F2 - Processing parameters  
 SI 16384  
 SF 100.6177873 MHz  
 WDM EM  
 SSB 0  
 LB 1.00 Hz  
 GB 0  
 PC 1.40



7.802  
7.780  
7.460  
7.442  
7.403  
7.384  
7.366  
7.297  
7.278  
7.260  
7.244  
7.240  
7.235  
7.217  
7.212  
7.126  
7.107  
7.089  
6.985  
6.966  
6.946  
6.690  
6.687

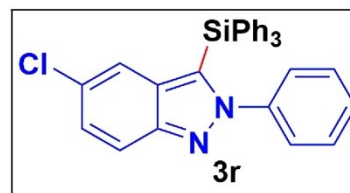

**<sup>1</sup>H NMR: 400 MHz**  
**Solvent: CDCl<sub>3</sub>**

Current Data Parameters  
NAME Dr. A HAJRA 2023 1H  
EXPNO 11  
PROCNO 1

F2 - Acquisition Parameters  
Date\_ 20230108  
Time\_ 17.45  
INSTRUM spect  
PROBHD 5 mm PABBO BB/  
PULPROG zg30  
TD 32768  
SOLVENT CDCl3  
NS 8  
DS 2  
SWH 8223.685 Hz  
FIDRES 0.250967 Hz  
AQ 1.9922944 sec  
RG 77.59  
DW 60.800 usec  
DE 6.50 usec  
TE 290.5 K  
D1 1.00000000 sec  
TDO 1

===== CHANNEL f1 =====  
SF01 400.1524711 MHz  
NUC1 1H  
P1 14.75 usec  
PLW1 12.00000000 W

F2 - Processing parameters  
SI 16384  
SF 400.1500156 MHz  
WDW EM  
SSB 0  
LB 0.30 Hz  
GB 0  
PC 1.00

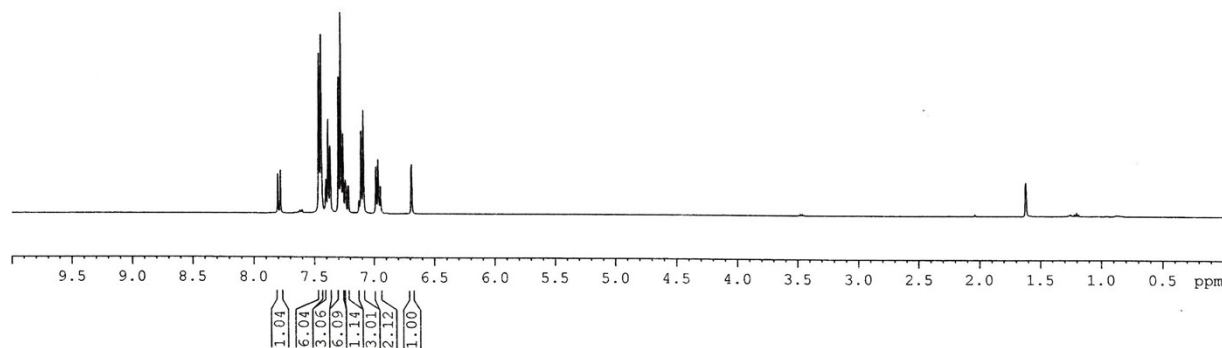

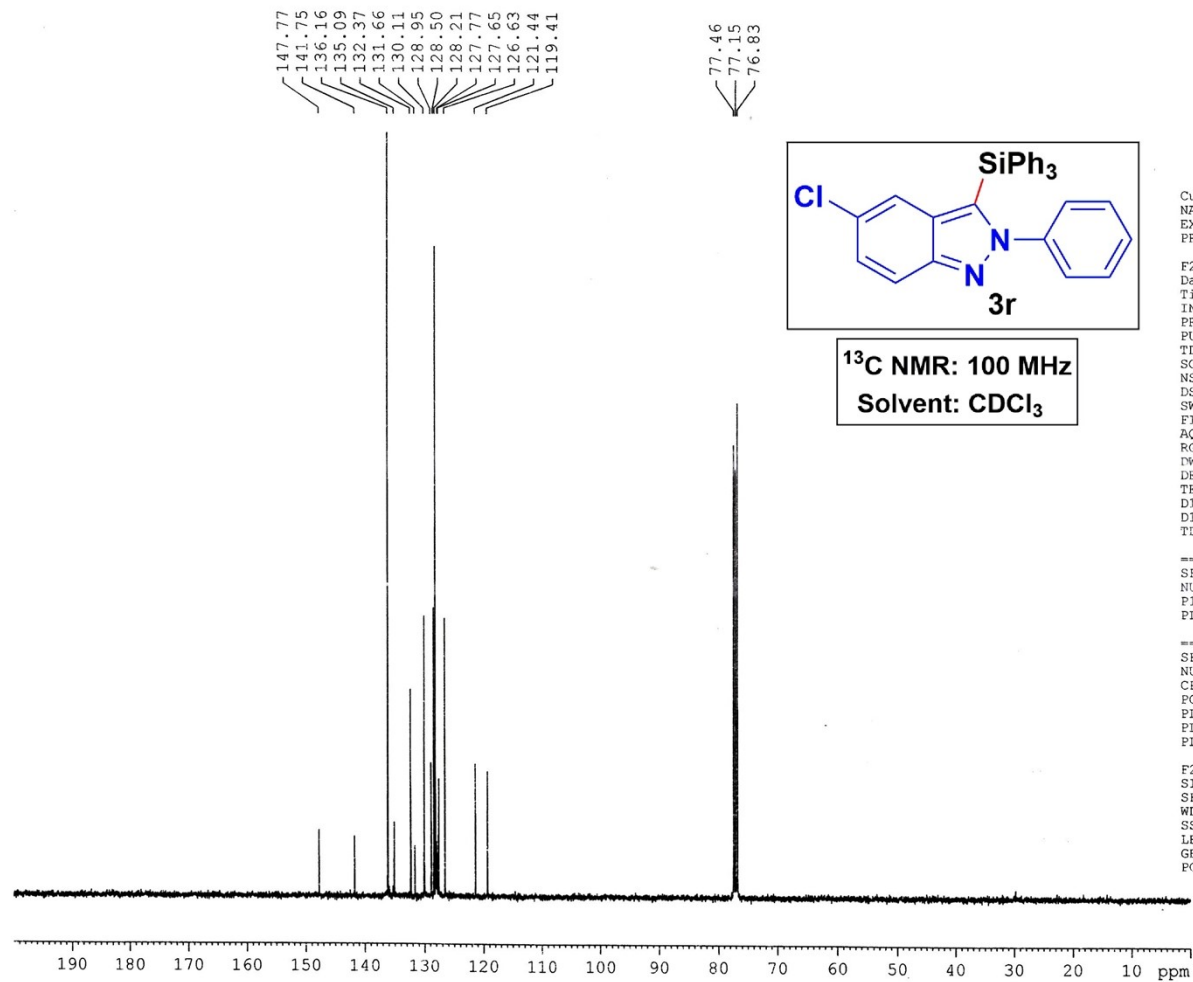

Current Data Parameters  
NAME Dr. A. HAJRA-2023-13C  
EXNO 5  
PROCNO 1

F2 - Acquisition Parameters  
Date\_ 20230107  
Time\_ 14.59  
INSTRUM spect  
PROBHD 5 mm PABBO BB/  
PULPROG zgpg30  
TD 32768  
SOLVENT CDCl3  
NS 520  
DS 2  
SWH 24038.461 Hz  
FIDRES 0.733596 Hz  
AQ 0.6815744 sec  
RG 186.42  
PW 20.800 usec  
DE 6.50 usec  
TE 289.4 K  
D1 2.00000000 sec  
D11 0.03000000 sec  
TDO 1

----- CHANNEL f1 -----  
SFO1 100.6278588 MHz  
NUC1 13C  
P1 8.90 usec  
PLW1 54.00000000 W

----- CHANNEL f2 -----  
SFO2 400.1516006 MHz  
NUC2 1H  
CPDPRG[2] waltz16  
PCPD2 90.00 usec  
PLW2 12.00000000 W  
PLW12 0.32231000 W  
PLW13 0.16212000 W

F2 - Processing parameters  
SI 16384  
SF 100.6177902 MHz  
WDW EM  
SSB 0  
LB 1.00 Hz  
GB 0  
PC 1.40

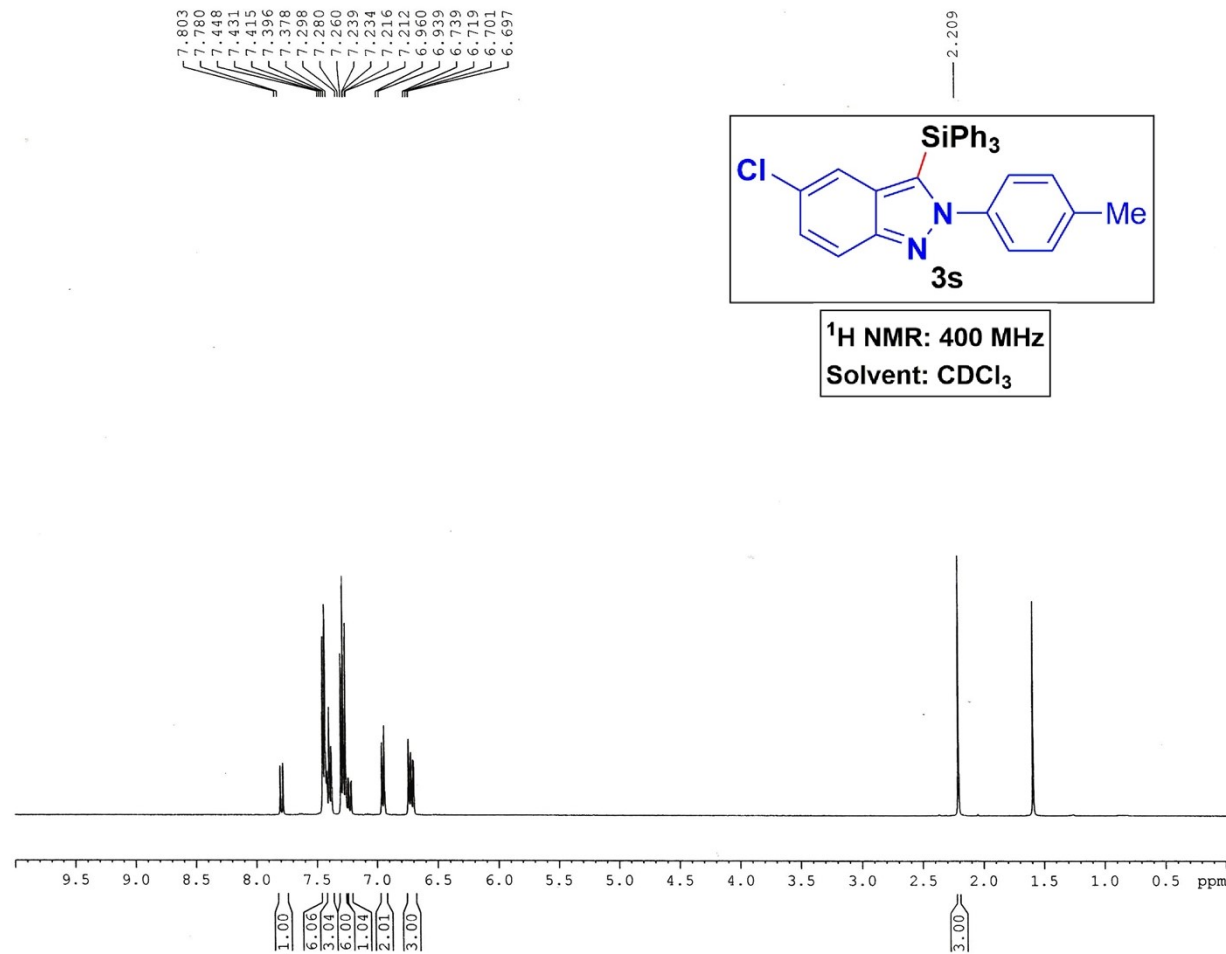

Current Data Parameters  
 NAME Dr. A HAJRA 2023 1H  
 EXPNO 360  
 PROCNO 1

F2 - Acquisition Parameters  
 Date\_ 20230324  
 Time 8.52  
 INSTRUM spect  
 PROBHD 5 mm PABBO BB/  
 PULPROG zg30  
 TD 32768  
 SOLVENT CDCl<sub>3</sub>  
 NS 8  
 DS 2  
 SWH 8223.685 Hz  
 FIDRES 0.250967 Hz  
 AQ 1.9922944 sec  
 RG 148.91  
 DW 60.800 usec  
 DE 6.50 usec  
 TE 295.4 K  
 D1 1.00000000 sec  
 TD0 1

===== CHANNEL f1 =====  
 SF01 400.1524711 MHz  
 NUC1 1H  
 P1 14.75 usec  
 PLW1 12.00000000 W

F2 - Processing parameters  
 SI 16384  
 SF 400.1500097 MHz  
 WDW EM  
 SSB 0  
 LB 0.30 Hz  
 GB 0  
 PC 1.00

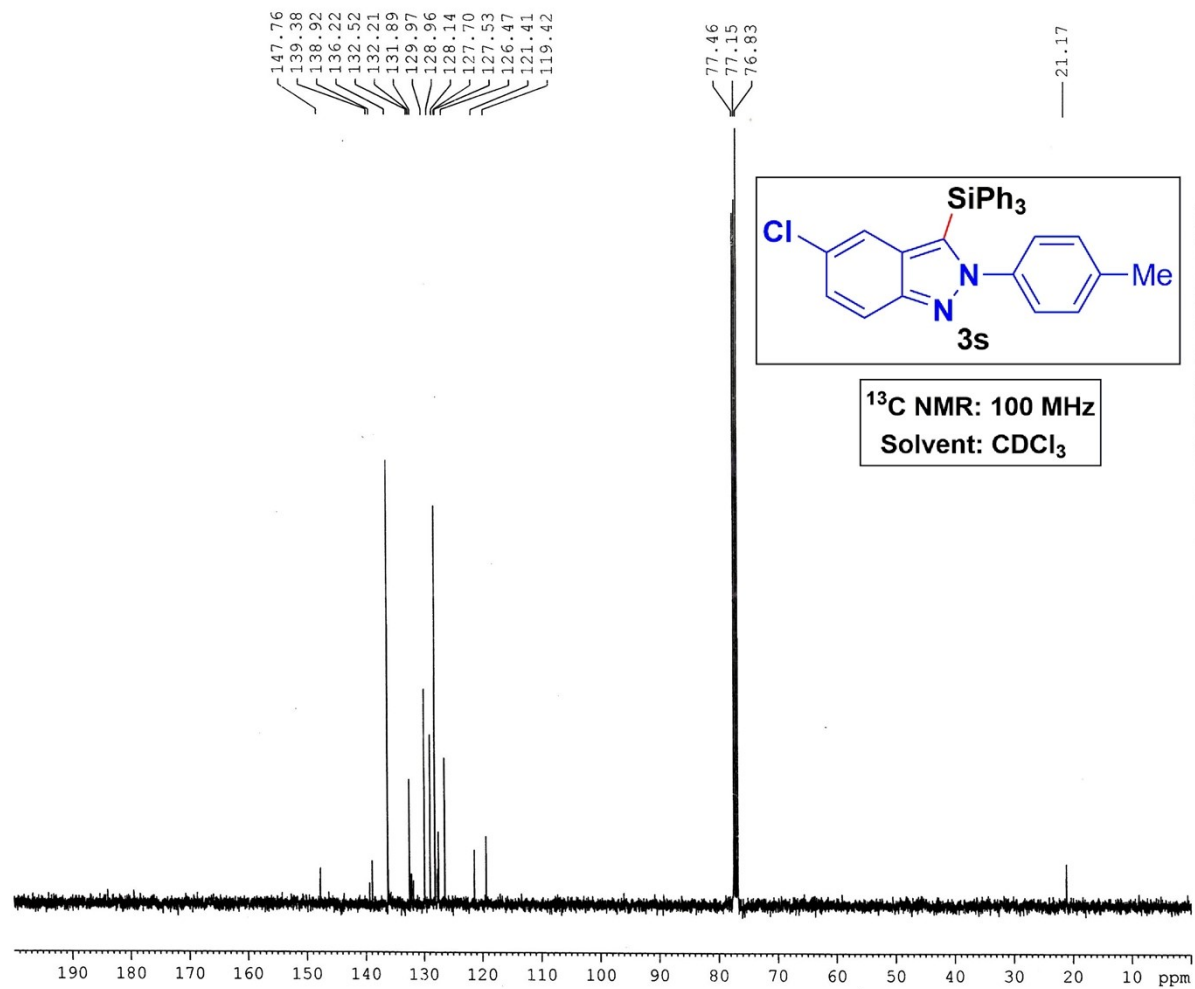

Current Data Parameters  
 NAME Dr. A HAJRA-2023-13C  
 EXPNO 99  
 PROCNO 1

F2 - Acquisition Parameters  
 Date\_ 20230324  
 Time 9:14  
 INSTRUM spect  
 PROBHD 5 mm PABBO BB/  
 PULPROG zgpg30  
 TD 32768  
 SOLVENT CDCl3  
 NS 320  
 DS 2  
 SWH 24038.461 Hz  
 FIDRES 0.733596 Hz  
 AQ 0.6815744 sec  
 RG 186.42  
 DW 20.800 usec  
 DE 6.50 usec  
 TE 295.9 K  
 DI 2.00000000 sec  
 D11 0.03000000 sec  
 TD0 1

===== CHANNEL f1 =====  
 SFO1 100.6278588 MHz  
 NUC1 13C  
 P1 8.90 usec  
 PLW1 54.00000000 W

===== CHANNEL f2 =====  
 SFO2 400.1516006 MHz  
 NUC2 1H  
 CPDPRG[2] waltz16  
 PCPD2 90.00 usec  
 PLW2 12.00000000 W  
 PLW12 0.32231000 W  
 PLW13 0.16212000 W

F2 - Processing parameters  
 SI 16384  
 SF 100.6177858 MHz  
 WDW EM  
 SSB 0  
 LB 1.00 Hz  
 GB 0  
 PC 1.40

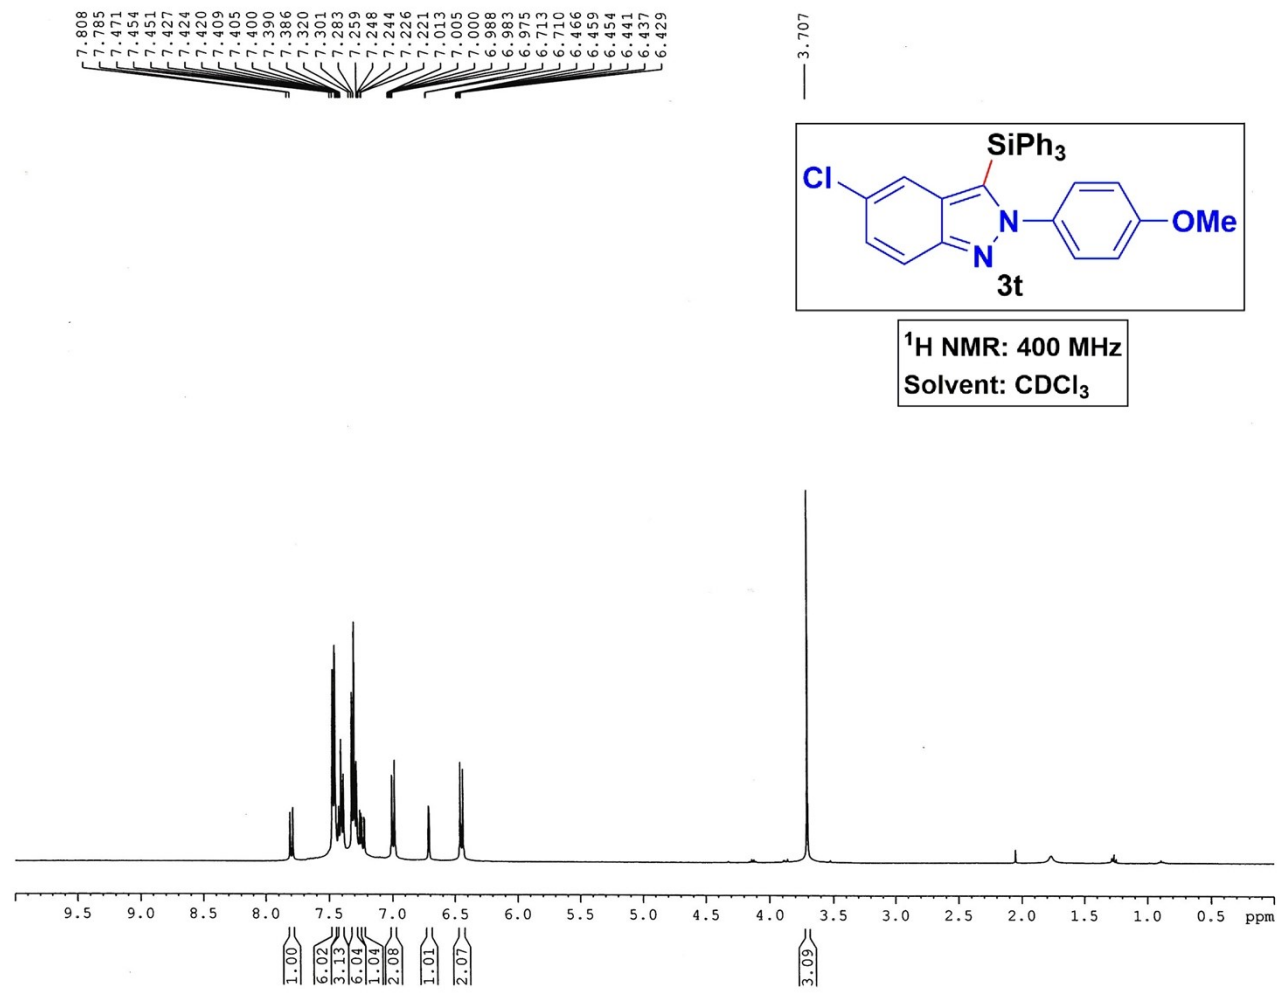

Current Data Parameters  
NAME Dr. A HAJRA 2023 1H  
EXPNO 664  
PROCNO 1

F2 - Acquisition Parameters  
Date\_ 20230602  
Time\_ 16.19  
INSTRUM spect  
PROBHD 5 mm PABBO BB/  
PULPROG zg30  
TD 32768  
SOLVENT CDCl3  
NS 8  
DS 2  
SWH 8223.685 Hz  
FIDRES 0.250967 Hz  
AQ 1.9922944 sec  
RG 77.59  
DW 60.800 usec  
DE 6.50 usec  
TE 297.9 K  
D1 1.00000000 sec  
TDO 1

===== CHANNEL f1 =====  
SF01 400.1524711 MHz  
NUC1 1H  
P1 14.75 usec  
PLW1 12.00000000 W

F2 - Processing parameters  
SI 16384  
SF 400.1500097 MHz  
WDW EM  
SSB 0  
LB 0.30 Hz  
GB 0  
PC 1.00

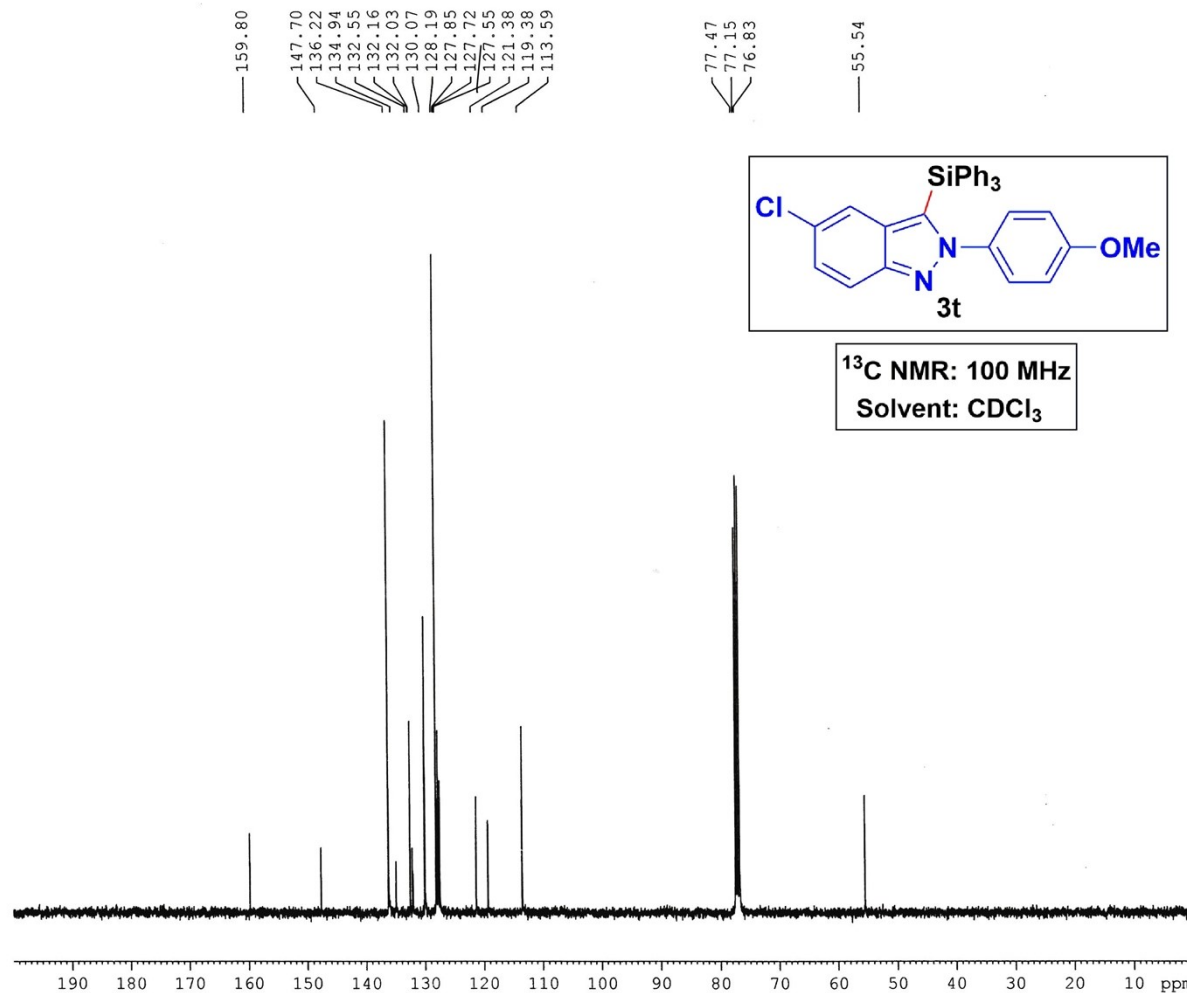

Current Data Parameters  
 NAME Dr. A HAJRA-2023-13C  
 EXPNO 210  
 PROCNO 1

F2 - Acquisition Parameters  
 Date\_ 20230602  
 Time\_ 16.41  
 INSTRUM spect  
 PROBHD 5 mm PABBO BB/  
 PULPROG zgpg30  
 TD 32768  
 SOLVENT CDCl3  
 NS 300  
 DS 2  
 SWH 24038.461 Hz  
 FIDRES 0.733596 Hz  
 AQ 0.6815744 sec  
 RG 135.7  
 DW 20.800 usec  
 DE 6.50 usec  
 TE 298.4 K  
 D1 2.0000000 sec  
 D11 0.0300000 sec  
 TD0 1

===== CHANNEL f1 =====  
 SFO1 100.6278588 MHz  
 NUC1 13C  
 P1 8.90 usec  
 PLW1 54.0000000 W

===== CHANNEL f2 =====  
 SFO2 400.1516006 MHz  
 NUC2 1H  
 CPDPRG[2] waltz16  
 PCPD2 90.00 usec  
 PLW2 12.0000000 W  
 PLW12 0.32231000 W  
 PLW13 0.16212000 W

F2 - Processing parameters  
 SI 16384  
 SF 100.6177872 MHz  
 WDW EM  
 SSB 0  
 LB 1.00 Hz  
 GB 0  
 PC 1.40

7.817  
7.795  
7.785  
7.768  
7.765  
7.739  
7.720  
7.742  
7.724  
7.705  
7.272  
7.268  
7.259  
7.250  
7.245  
7.039  
7.018  
6.929  
6.907  
6.753  
6.749

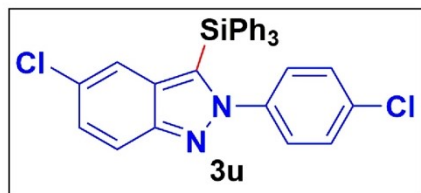

<sup>1</sup>H NMR: 400 MHz  
Solvent: CDCl<sub>3</sub>

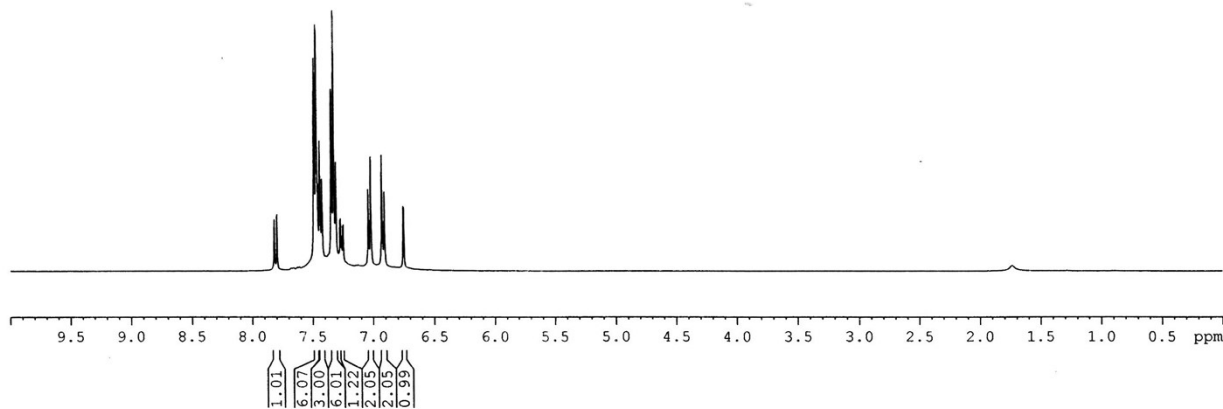

Current Data Parameters  
NAME Dr. A HAJRA 2023 1H  
EXPNO 691  
PROCNO 1

F2 - Acquisition Parameters  
Date\_ 20230615  
Time 10.20  
INSTRUM spect  
PROBHD 5 mm PABBO BB/  
PULPROG zg30  
TD 32768  
SOLVENT CDCl3  
NS 8  
DS 2  
SWH 8223.685 Hz  
FIDRES 0.250967 Hz  
AQ 1.9922944 sec  
RG 57.28  
DW 60.800 usec  
DE 6.50 usec  
TE 298.4 K  
D1 1.00000000 sec  
TD0 1

==== CHANNEL f1 =====  
SFO1 400.1524711 MHz  
NUC1 1H  
P1 14.75 usec  
PLW1 12.00000000 W

F2 - Processing parameters  
SI 16384  
SF 400.1500099 MHz  
WDW EM  
SSB 0  
LB 0.30 Hz  
GB 0  
PC 1.00

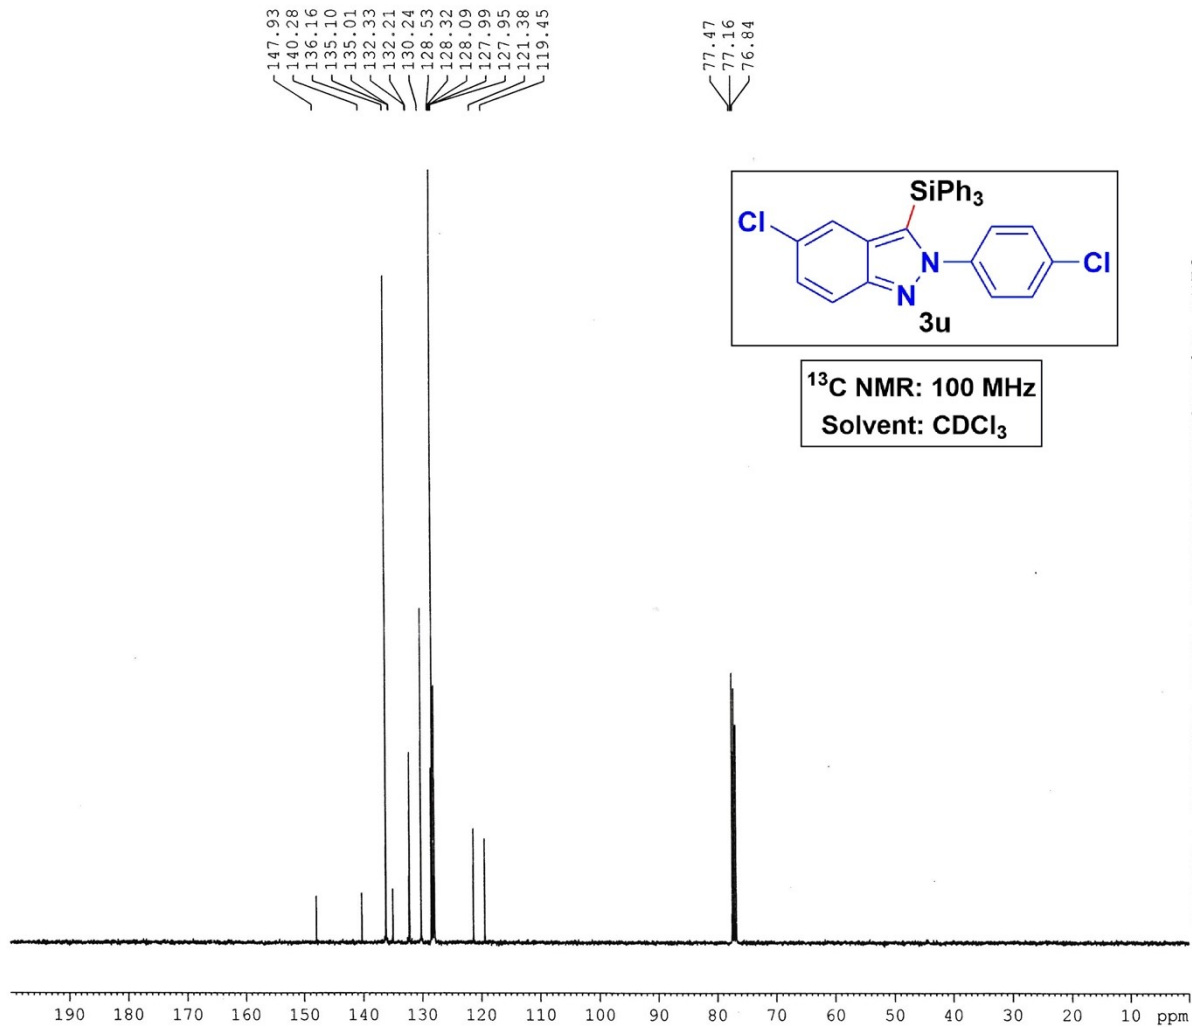

Current Data Parameters  
 NAME Dr. A HAJRA-2023-13C  
 EXPNO 221  
 PROCNO 1

F2 - Acquisition Parameters  
 Date\_ 20230615  
 Time 10.46  
 INSTRUM spect  
 PROBHD 5 mm PABBO BB/  
 PULPROG zgpg30  
 TD 32768  
 SOLVENT CDCl3  
 NS 320  
 DS 2  
 SWH 24038.461 Hz  
 FIDRES 0.733596 Hz  
 AQ 0.6815744 sec  
 RG 135.7  
 DW 20.800 usec  
 DE 6.50 usec  
 TE 299.5 K  
 D1 2.00000000 sec  
 D11 0.03000000 sec  
 TD0 1

===== CHANNEL f1 =====  
 SFO1 100.6278588 MHz  
 NUC1 13C  
 P1 8.90 usec  
 PLW1 54.00000000 W

===== CHANNEL f2 =====  
 SFO2 400.1516006 MHz  
 NUC2 1H  
 CPDPRG2 waltz16  
 PCPD2 90.00 usec  
 PLW2 12.00000000 W  
 PLW12 0.32231000 W  
 PLW13 0.16212000 W

F2 - Processing parameters  
 SI 16384  
 SF 100.6177887 MHz  
 WDW EM  
 SSB 0  
 LB 1.00 Hz  
 GB 0  
 FC 1.40



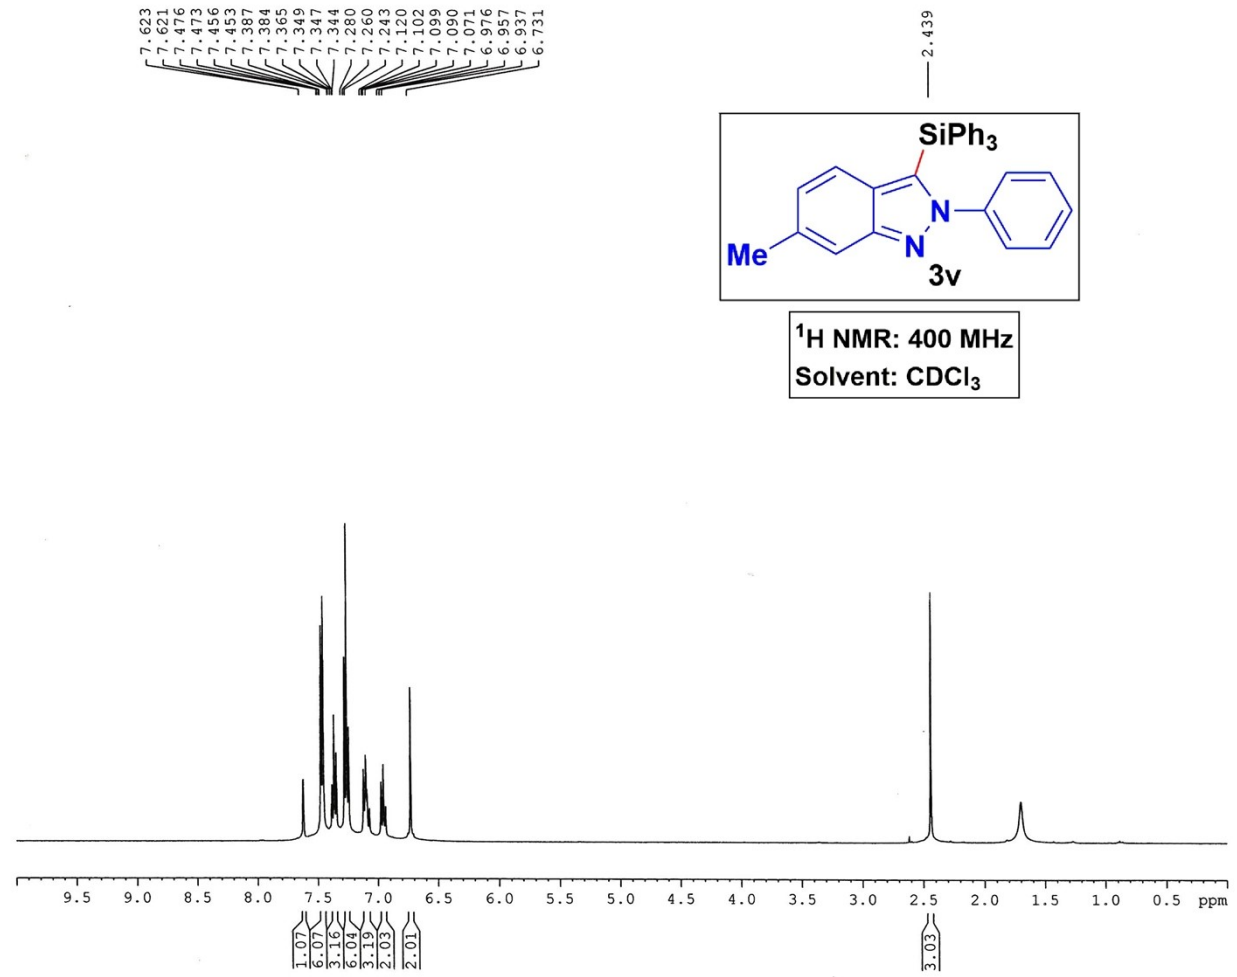

Current Data Parameters  
NAME Dr. A HAJRA 2023 1H  
EXPNO 869  
PROCNO 1

F2 - Acquisition Parameters  
Date\_ 20230720  
Time\_ 11.46  
INSTRUM spect  
PROBHD 5 mm PABBO BB/  
PULPROG zg30  
TD 32768  
SOLVENT CDCl3  
NS 8  
DS 2  
SWH 8223.685 Hz  
FIDRES 0.250967 Hz  
AQ 1.9922944 sec  
RG 135.7  
DW 60.800 usec  
DE 6.50 usec  
TE 297.1 K  
D1 1.00000000 sec  
TD0 1

===== CHANNEL f1 =====  
SF01 400.1524711 MHz  
NUC1 1H  
P1 14.75 usec  
PLW1 12.00000000 W

F2 - Processing parameters  
SI 16384  
SF 400.1500097 MHz  
WDW EM  
SSB 0  
LB 0.30 Hz  
GB 0  
PC 1.00

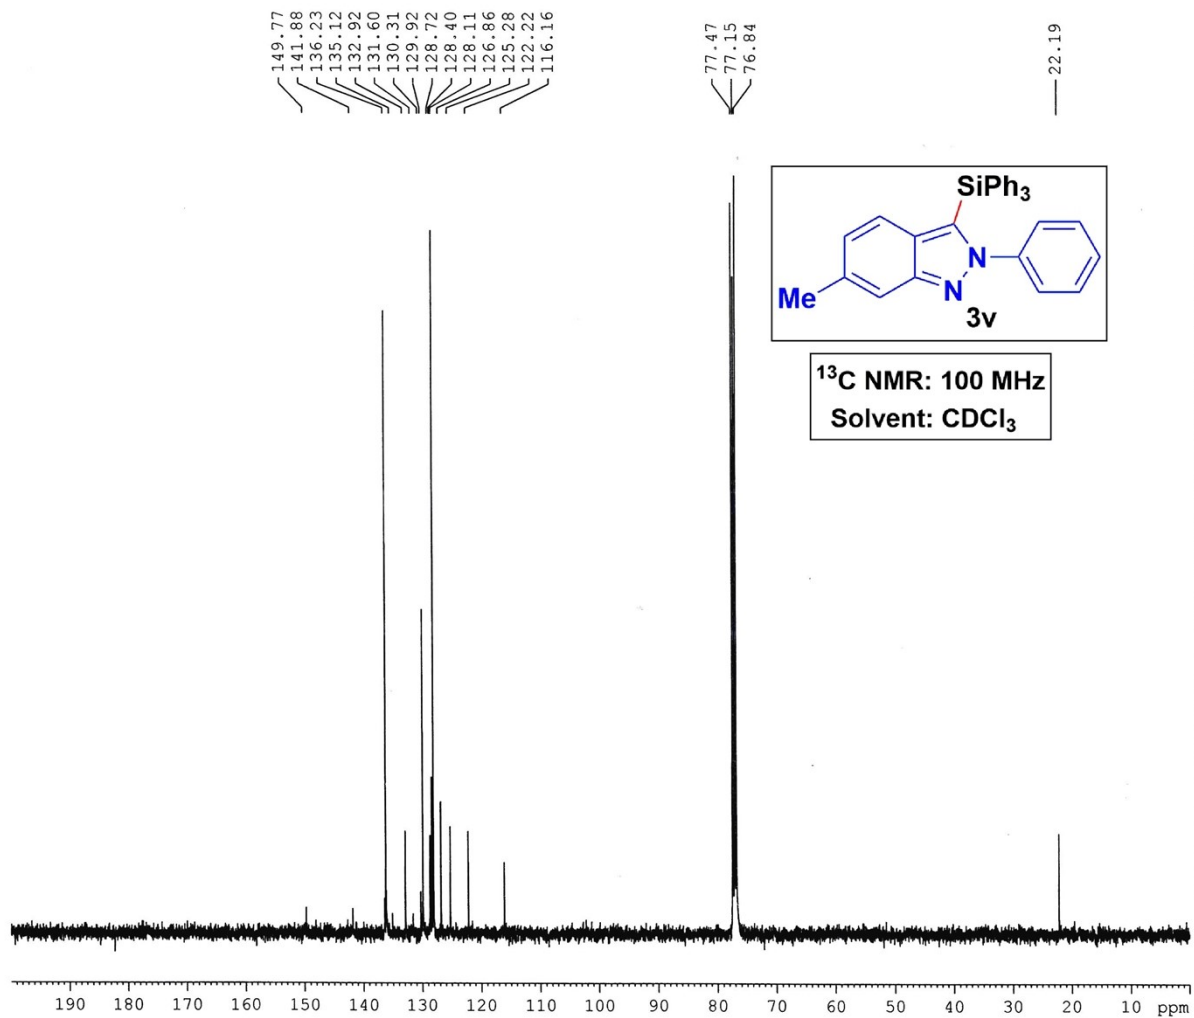

Current Data Parameters  
NAME Dr. A HAJRA-2023-13C  
EXNO 293  
PROCNO 1

F2 - Acquisition Parameters  
Date\_ 20230721  
Time 21.16  
INSTRUM spect  
PROBHD 5 mm PABBO BB/  
PULPROG zgpg30  
TD 32768  
SOLVENT CDCl3  
NS 520  
DS 2  
SWH 24038.461 Hz  
FIDRES 0.733596 Hz  
AQ 0.6815744 sec  
RG 186.42  
DW 20.800 usec  
DE 6.50 usec  
TE 299.4 K  
D1 2.00000000 sec  
D11 0.03000000 sec  
TDO 1

----- CHANNEL f1 -----  
SFO1 100.6278588 MHz  
NUC1 13C  
P1 8.90 usec  
PLW1 54.00000000 W

----- CHANNEL f2 -----  
SFO2 400.1516006 MHz  
NUC2 1H  
CPDPRG[2] waltz16  
PCPD2 90.00 usec  
PLW2 12.00000000 W  
PLW12 0.32231000 W  
PLW13 0.16212000 W

F2 - Processing parameters  
SI 16384  
SF 100.6177851 MHz  
WDW EM  
SSB 0  
LB 1.00 Hz  
GB 0  
PC 1.40

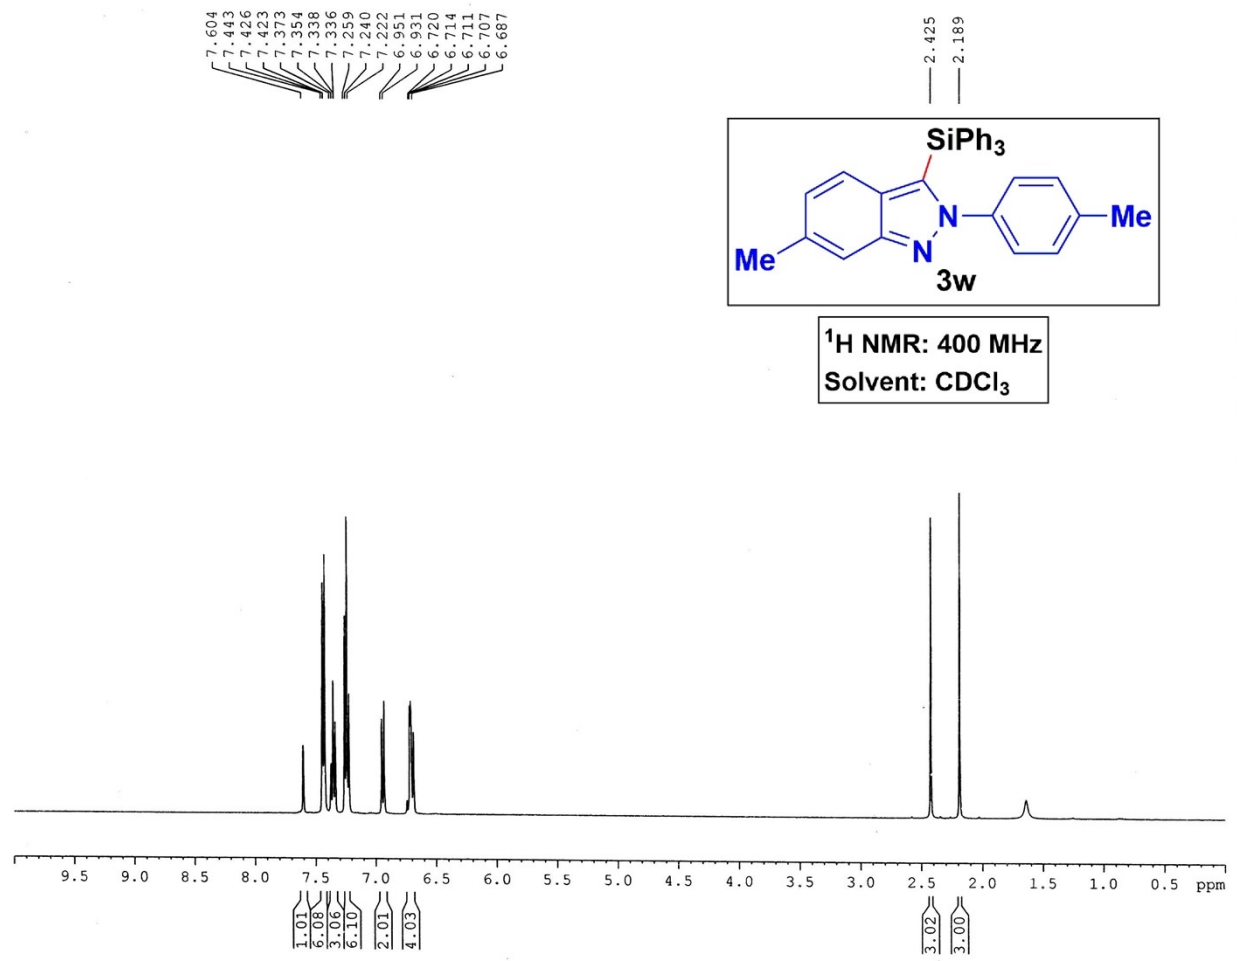

Current Data Parameters  
 NAME Dr. A HAJRA 2023 1H  
 EXPNO 331  
 PROCNO 1

F2 - Acquisition Parameters  
 Date\_ 20230316  
 Time\_ 16.13  
 INSTRUM spect  
 PROBHD 5 mm PABBO BB/  
 PULPROG zg30  
 TD 32768  
 SOLVENT CDCl3  
 NS 8  
 DS 2  
 SWH 8223.685 Hz  
 FIDRES 0.250967 Hz  
 AQ 1.9922944 sec  
 RG 120.16  
 DW 60.800 usec  
 DE 6.50 usec  
 TE 297.1 K  
 D1 1.00000000 sec  
 TDO 1

===== CHANNEL f1 =====  
 SF01 400.1524711 MHz  
 NUC1 1H  
 P1 14.75 usec  
 PLW1 12.00000000 W

F2 - Processing parameters  
 SI 16384  
 SF 400.1500152 MHz  
 WDW EM  
 SSB 0  
 LB 0.30 Hz  
 GB 0  
 FC 1.00

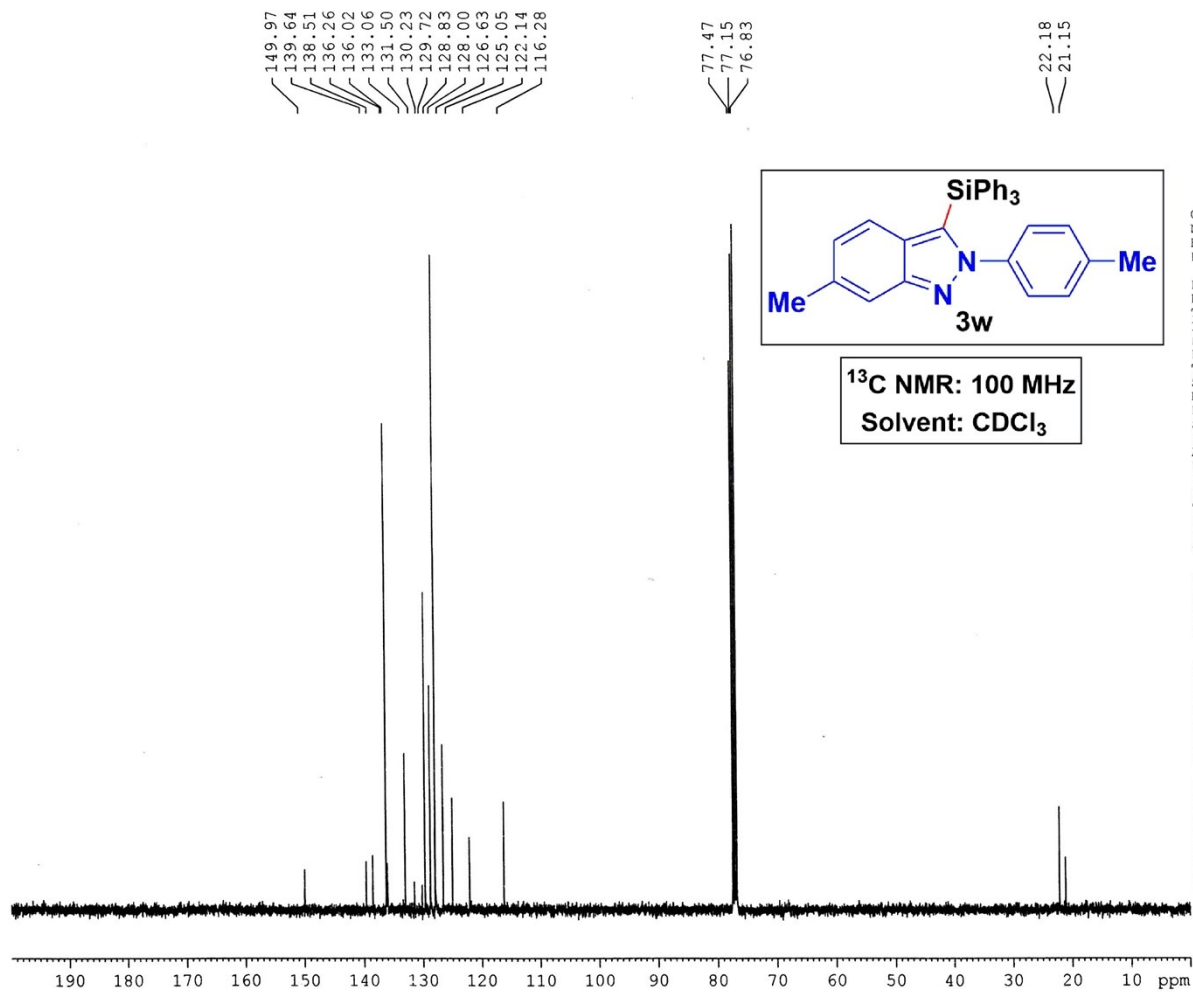

Current Data Parameters  
 NAME Dr. A HAJRA-2023-13C  
 EXPNO 88  
 PROCNO 1

F2 - Acquisition Parameters  
 Date - 20230316  
 Time - 16.31  
 INSTRUM spect  
 PROBHD 5 mm PABBO BB/  
 PULPROG zgpg30  
 TD 32768  
 SOLVENT CDCl3  
 NS 320  
 DS 2  
 SWH 24038.461 Hz  
 FIDRES 0.733596 Hz  
 AQ 0.6815744 sec  
 RG 186.42  
 DW 20.800 usec  
 DE 6.50 usec  
 TE 297.3 K  
 D1 2.0000000 sec  
 D11 0.0300000 sec  
 TD0 1

----- CHANNEL f1 -----  
 SFO1 100.6278588 MHz  
 NUC1 13C  
 P1 8.90 usec  
 PLW1 54.0000000 W

----- CHANNEL f2 -----  
 SFO2 400.1516006 MHz  
 NUC2 1H  
 CPDPRG[2] waltz16  
 PCPD2 90.00 usec  
 PLW2 12.0000000 W  
 PLW12 0.32231000 W  
 PLW13 0.16212000 W

F2 - Processing parameters  
 SI 16384  
 SF 100.6177858 MHz  
 WDW EM  
 SSB 0  
 LB 1.00 Hz  
 GB 0  
 FC 1.40

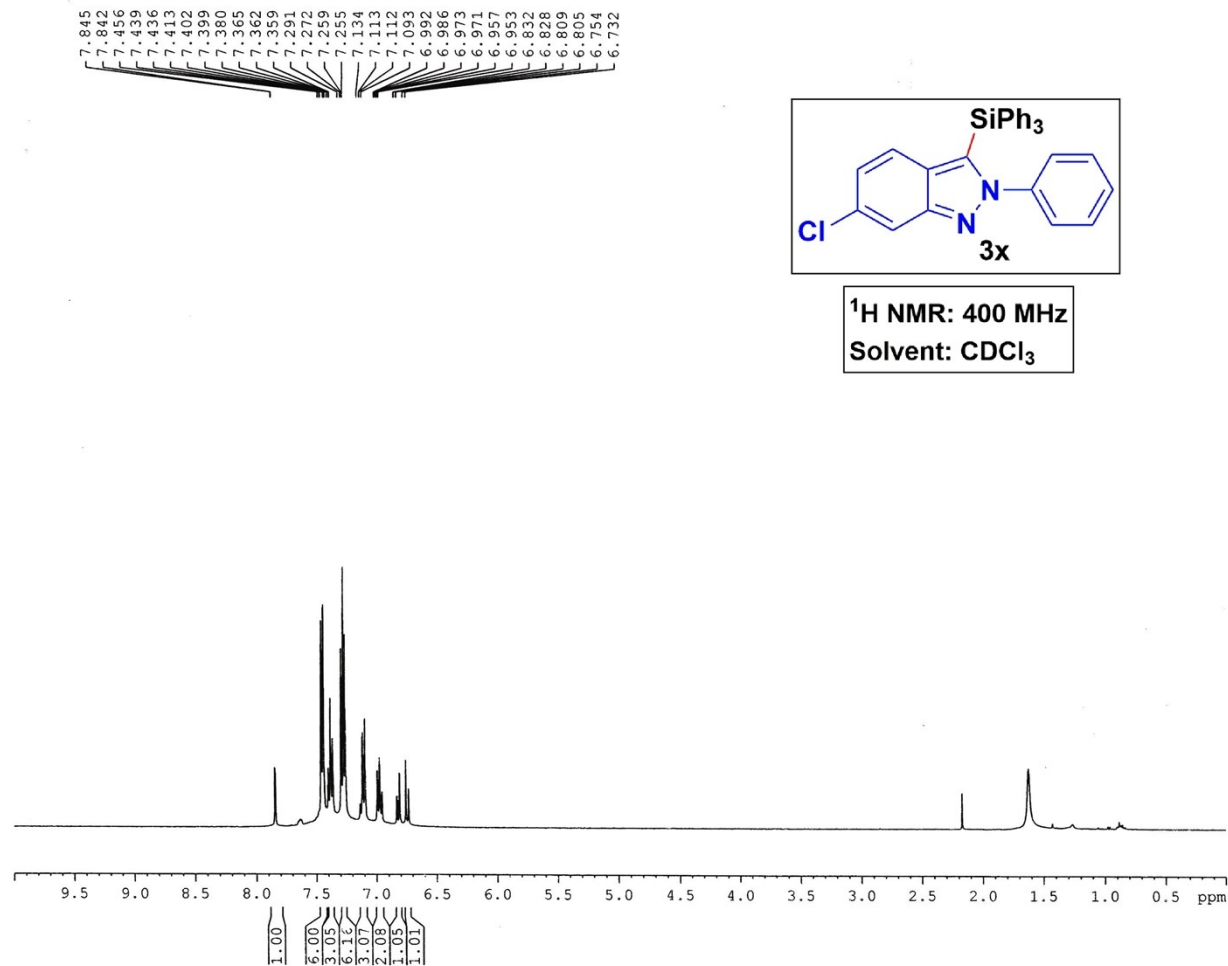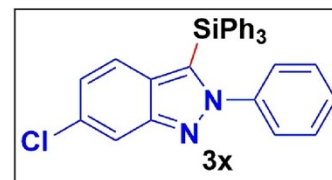

**<sup>1</sup>H NMR: 400 MHz**  
**Solvent: CDCl<sub>3</sub>**

Current Data Parameters  
 NAME Dr. A HAJRA 2023 1H  
 EXPNO 906  
 PROCNO 1

F2 - Acquisition Parameters  
 Date\_ 20230728  
 Time 16.39  
 INSTRUM spect  
 PROBHD 5 mm PABBO BB/  
 PULPROG zg30  
 TD 32768  
 SOLVENT CDCl3  
 NS 8  
 DS 2  
 SWH 8223.685 Hz  
 FIDRES 0.250967 Hz  
 AQ 1.922944 sec  
 RG 148.91  
 DW 60.800 usec  
 DE 6.50 usec  
 TE 297.9 K  
 D1 1.00000000 sec  
 TD0 1

===== CHANNEL f1 =====  
 SF01 400.1524711 MHz  
 NUC1 1H  
 P1 14.75 usec  
 PLW1 12.00000000 W

F2 - Processing parameters  
 SI 16384  
 SF 400.1500097 MHz  
 WDW EM  
 SSB 0  
 LB 0.30 Hz  
 GB 0  
 PC 1.00

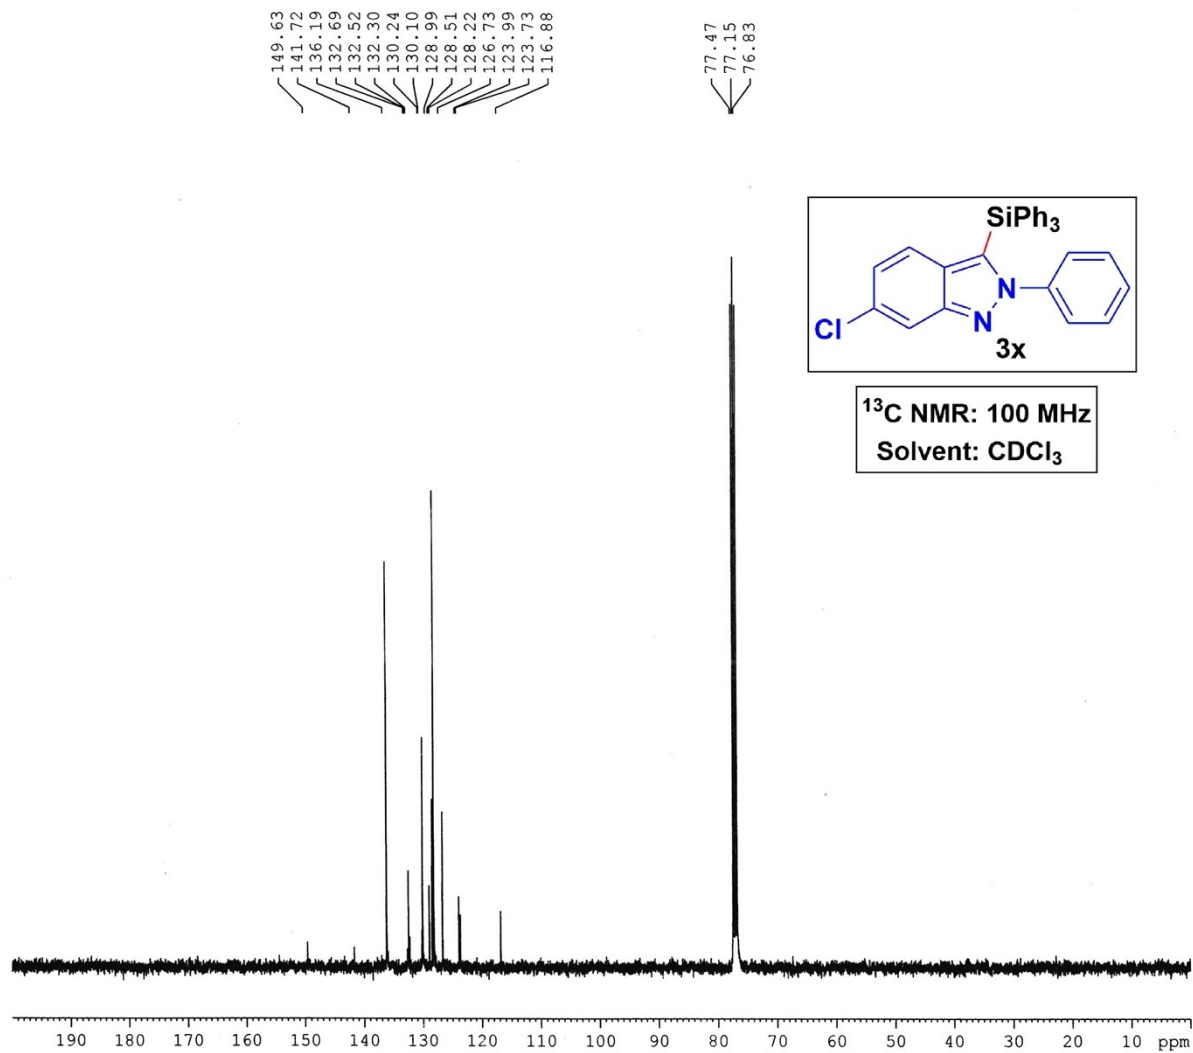

Current Data Parameters  
NAME Dr. A HAJRA-2023-13C  
EXPNO 307  
PROCNO 1

F2 - Acquisition Parameters  
Date\_ 20230728  
Time 17.16  
INSTRUM spect  
PROBHD 5 mm PABBO BB/  
PULPROG zgpg30  
TD 32768  
SOLVENT CDCl3  
NS 590  
DS 2  
SWH 24038.461 Hz  
FIDRES 0.733596 Hz  
AQ 0.6815744 sec  
RG 186.42  
DW 20.800 usec  
DE 6.50 usec  
TE 298.5 K  
D1 2.00000000 sec  
D11 0.03000000 sec  
TDO 1

----- CHANNEL f1 -----  
SF01 100.6276588 MHz  
NUC1 13C  
P1 8.90 usec  
PLW1 54.00000000 W

----- CHANNEL f2 -----  
SF02 400.1516006 MHz  
NUC2 1H  
CPDPRG[2] waltz16  
PCPD2 90.00 usec  
PLW2 12.00000000 W  
PLW12 0.32231000 W  
PLW13 0.16212000 W

F2 - Processing parameters  
SI 16384  
SF 100.6177844 MHz  
WDW EM  
SSB 0  
LB 1.00 Hz  
GB 0  
PC 1.40

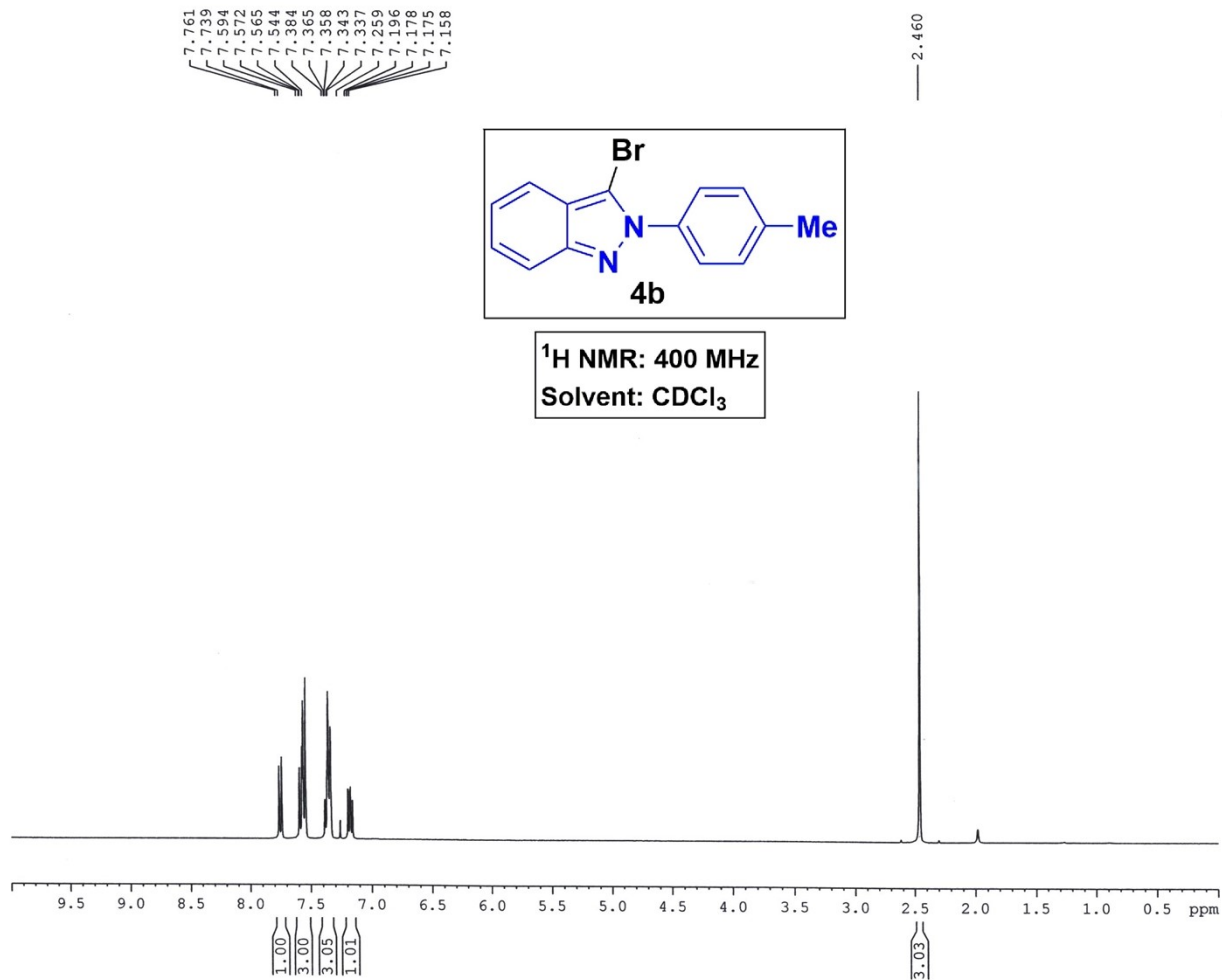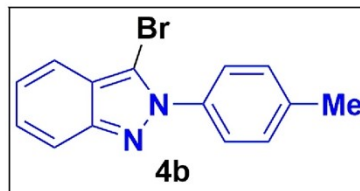

**<sup>1</sup>H NMR: 400 MHz**  
**Solvent: CDCl<sub>3</sub>**

Current Data Parameters  
NAME Dr. A HAJRA 2023 1H  
EXPNO 1299  
PROCNO 1

F2 - Acquisition Parameters  
Date\_ 20231218  
Time 10.45  
INSTRUM spect  
PROBHD 5 mm PABBO BB/  
PULPROG zg30  
TD 32768  
SOLVENT CDCl3  
NS 8  
DS 2  
SWH 8223.685 Hz  
FIDRES 0.250967 Hz  
AQ 1.9922944 sec  
RG 54.07  
DW 60.800 usec  
DE 6.50 usec  
TE 286.9 K  
D1 1.00000000 sec  
TD0 1

===== CHANNEL f1 =====  
SFO1 400.1524711 MHz  
NUC1 1H  
P1 14.75 usec  
PLW1 12.00000000 W

F2 - Processing parameters  
SI 16384  
SF 400.1500095 MHz  
WDW EM  
SSB 0  
LB 0.30 Hz  
GB 0  
PC 1.00

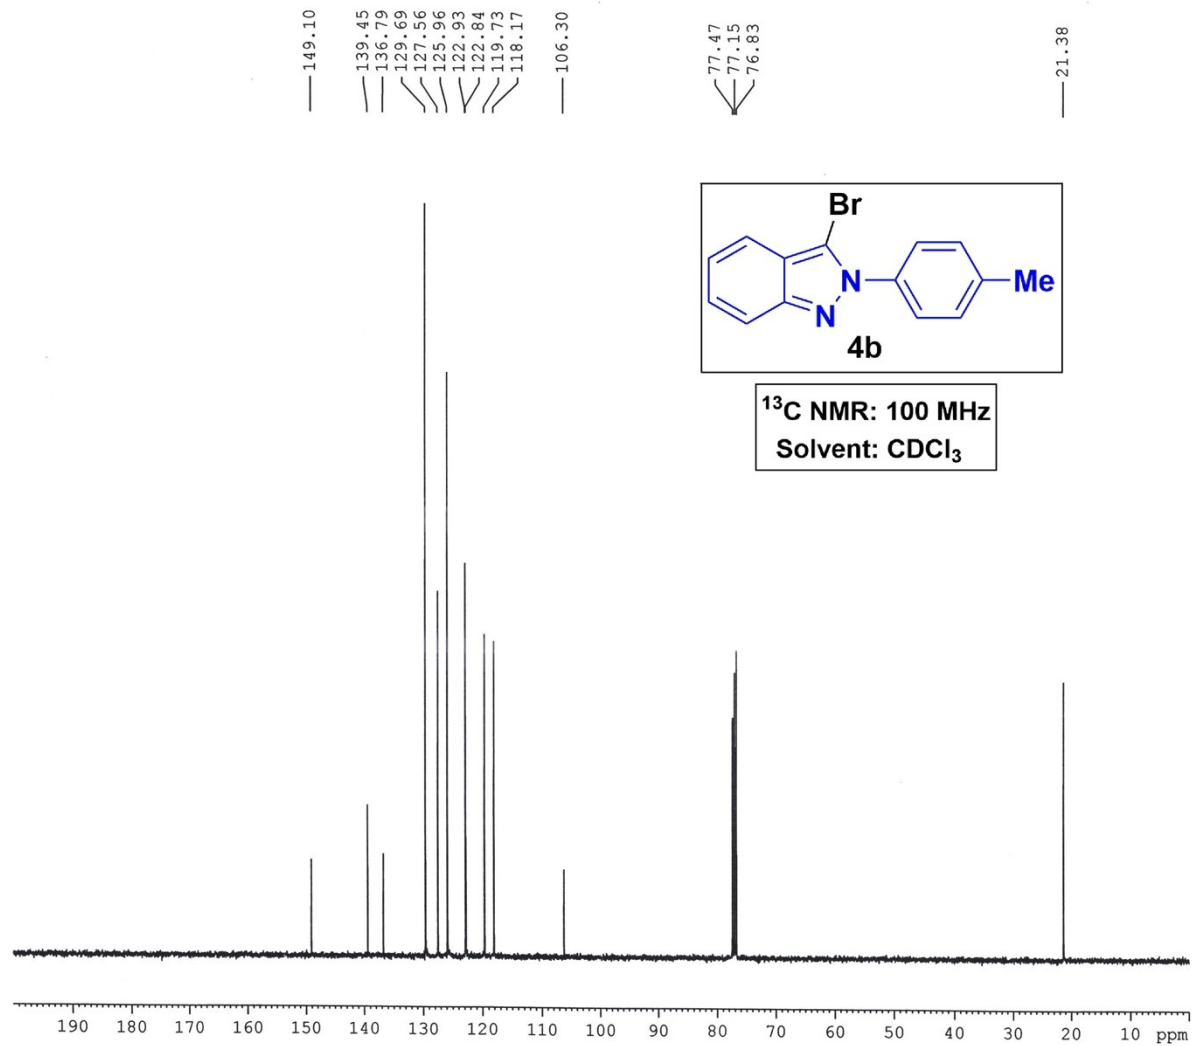

Current Data Parameters  
 NAME Dr. A HAJRA-2023-13C  
 EXPNO 449  
 PROCNO 1

F2 - Acquisition Parameters  
 Date\_ 20231218  
 Time 11.00  
 INSTRUM spect  
 PROBHD 5 mm PABBO BB/  
 PULPROG zgpg30  
 TD 32768  
 SOLVENT CDCl3  
 NS 215  
 DS 2  
 SWH 24038.461 Hz  
 FIDRES 0.733596 Hz  
 AQ 0.6815744 sec  
 RG 186.42  
 DW 20.800 usec  
 DE 6.50 usec  
 TE 287.7 K  
 D1 2.0000000 sec  
 D11 0.0300000 sec  
 TDO 1

----- CHANNEL f1 -----  
 SF01 100.6278588 MHz  
 NUC1 13C  
 P1 8.90 usec  
 PLW1 54.0000000 W

----- CHANNEL f2 -----  
 SF02 400.1516006 MHz  
 NUC2 1H  
 CPDPRG2 waltz16  
 FCPD2 90.00 usec  
 PLW2 12.0000000 W  
 PLW12 0.32231000 W  
 PLW13 0.16212000 W

F2 - Processing parameters  
 SI 16384  
 SF 100.6177961 MHz  
 WDW EM  
 SSB 0  
 LB 1.00 Hz  
 GB 0  
 PC 1.40
